# Supplementary material for: Discovery of a Series of Macrocycles as Potent Inhibitors of Leishmania Infantum
Source: PubMed Central journal article supplement (PMC11513892; doi:10.1021/acs.jmedchem.4c01370), 2024-10-08

## SUPPORTING INFORMATION

### Discovery of a Series of Macrocycles as Potent Inhibitors of *Leishmania Infantum*

Federico Riu,<sup>a</sup> Larissa Alena Ruppitsch,<sup>a</sup> Duc Duy Vo,<sup>a,b</sup> Richard S. Hong,<sup>c</sup> Mohit Tyagi,<sup>a</sup> An Matheeussen,<sup>d</sup> Sarah Hendrickx,<sup>d</sup> Vasanthanathan Poongavanam,<sup>a</sup> Guy Caljon,<sup>d</sup> Ahmad Y. Sheikh,<sup>e</sup> Peter Sjö,<sup>f,\*</sup> Jan Kihlberg<sup>a,\*</sup>

<sup>a</sup>*Department of Chemistry – BMC, Uppsala University, 751 23 Uppsala, Sweden*

<sup>b</sup>*Science for Life Laboratory, Department of Cell and Molecular Biology, Uppsala University, 751 24 Uppsala, Sweden*

<sup>c</sup>*Molecular Profiling and Drug Delivery, Research & Development, AbbVie Inc., Worcester, MA 01605, USA*

<sup>d</sup>*Laboratory of Microbiology, Parasitology and Hygiene, University of Antwerp, Universiteitsplein 1, 2610 Wilrijk, Belgium*

<sup>e</sup>*Molecular Profiling and Drug Delivery, Research & Development, AbbVie Inc, North Chicago, IL 60064, USA*

<sup>f</sup>*Drugs for Neglected Diseases initiative (DNDi), 15 Chemin Camille-Vidart, 1202 Geneva, Switzerland*

#### Corresponding authors

Peter Sjö, [psjo@dndi.org](mailto:psjo@dndi.org), ORCID: 0000-0002-6768-0536

Jan Kihlberg, [jan.kihlberg@kemi.uu.se](mailto:jan.kihlberg@kemi.uu.se), ORCID: 0000-0002-4205-6040

## CONTENTS

- Page S3  
*In vitro* potencies for inhibition of the growth of four kinetoplastid parasites by compounds **1-12** (Table S1).
- Page S3  
*Endo* and *exo* conformations for compound **3**, obtained using the Monte Carlo-QM protocol for conformational sampling (Figure S1).
- Page S4  
*Endo* and *exo* conformations for compound **5**, obtained using the Monte Carlo-QM protocol for conformational sampling (Figure S2).
- Page S4  
Metabolically labile sites (indicated by red circles) observed for compound **3** after incubation with rat liver microsomes. (Figure S3).
- Page S5  
Correlations between **A**) the permeability across MDCK-MDR1 cell monolayers and LogD<sub>7.4</sub> and **B**) the potency for inhibition of the growth of *L. infantum* and the cell permeability for compounds **1-12** (Figure S4).
- Pages S6-S51  
NMR spectra.
- Pages S52-S57  
HPLC chromatograms and mass spectra.

**Table S1.** *In vitro* potencies for inhibition of the growth of four kinetoplastid parasites by compounds **1-12**.<sup>a</sup>

| COMPOUNDS        |                          | 1         | 2       | 3         | 4         | 5         | 6         | 7         | 8         | 9         | 10        | 11       | 12        |
|------------------|--------------------------|-----------|---------|-----------|-----------|-----------|-----------|-----------|-----------|-----------|-----------|----------|-----------|
| EC <sub>50</sub> | <i>T. b. brucei</i>      | 6.1 (2.0) | 37 (24) | 15 (10)   | 33 (0.2)  | 7.4 (3.0) | 12 (11)   | 49 (15)   | 8.1 (0.1) | 7.7 (0)   | 8.5 (0.8) | 36 (19)  | 30 (1.4)  |
|                  | <i>T. b. rhodesiense</i> | 6.0 (1.4) | 29 (26) | 9.1 (4.6) | 6.1 (0.9) | 5.6 (2.4) | 6.3 (2.4) | 9.7 (1.4) | 6.4 (0.1) | 1.9 (0.1) | 2.1 (0.4) | 24 (10)  | 21 (13)   |
|                  | <i>T. cruzi</i>          | 15 (4.7)  | 41 (26) | 20 (18)   | 64 (0)    | 18 (14)   | 19 (11)   | 36 (5.6)  | 6.1 (2.1) | 19 (11)   | 50 (15)   | 33 (7.9) | 64 (0)    |
|                  | <i>L. infantum</i>       | 33 (0.4)  | 31 (19) | 1.8 (1.9) | 38 (26)   | 17 (14)   | 12 (5.9)  | 16 (4.7)  | 8.2 (0.1) | 6.6 (1.5) | 2.1 (0.6) | 38 (7.8) | 7.1 (1.0) |

<sup>a</sup> Mean values, with standard deviation in parenthesis, from 2 to 14 measurements.

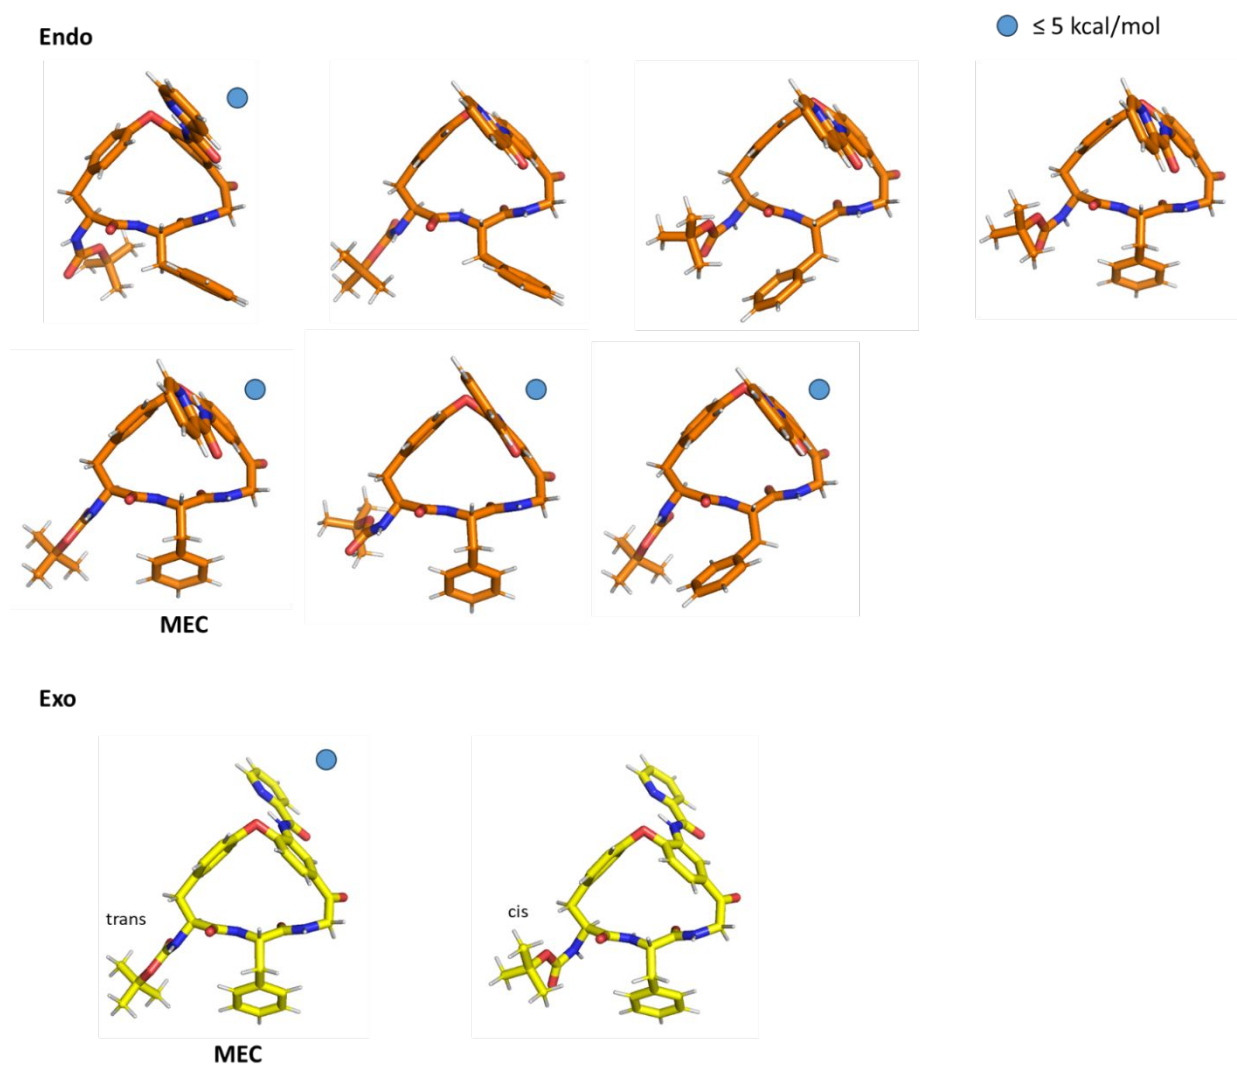

**Figure S1.** *Endo* and *exo* conformations for compound **3**, obtained using the Monte Carlo-QM protocol for conformational sampling. Minimum energy conformations (MECs) and all conformations within 5 kcal/mol of the MECs are shown.

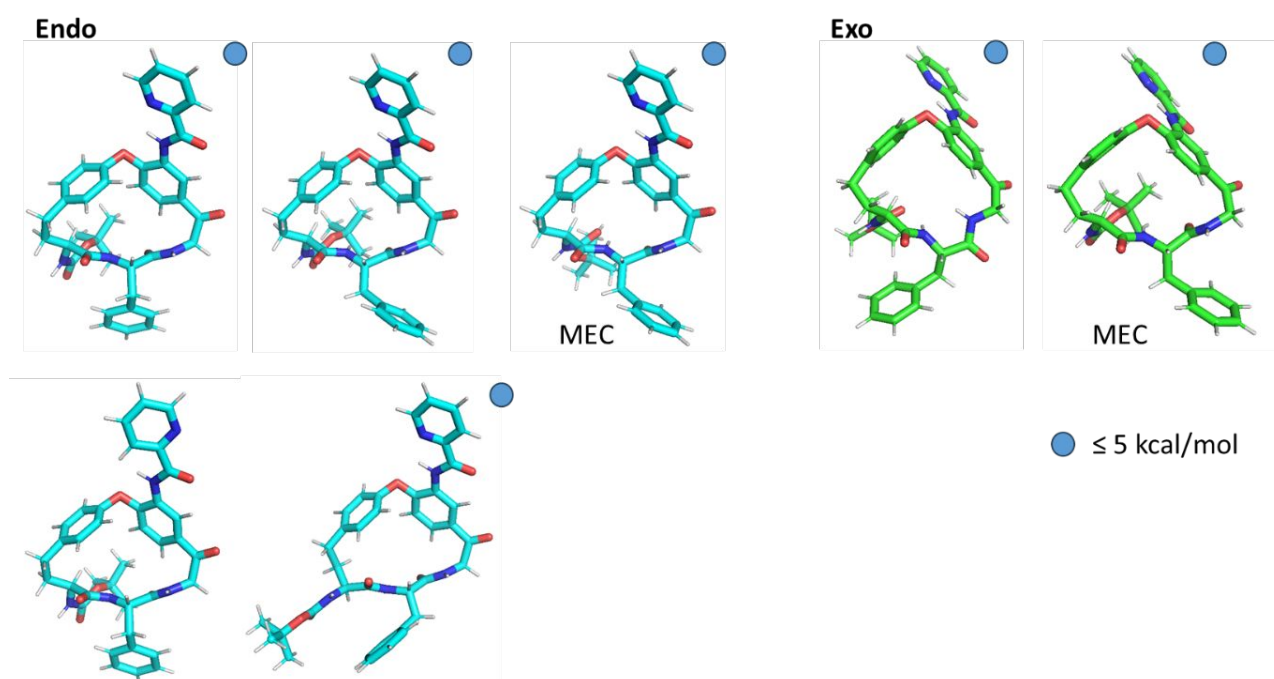

**Figure S2.** *Endo* and *exo* conformations for compound **5**, obtained using the Monte Carlo-QM protocol for conformational sampling. Minimum energy conformations (MECs) and all conformations within 5 kcal/mol of the MECs are shown.

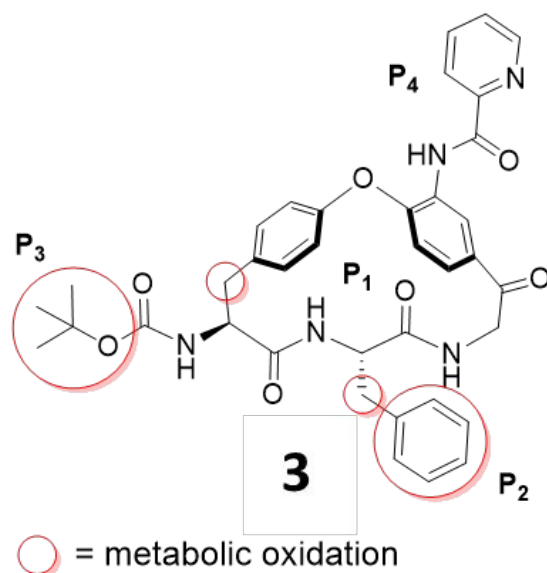

**Figure S3.** Metabolically labile sites (indicated by red circles) observed for compound **3** after incubation with rat liver microsomes. Samples were collected at 5, 10, 20, 30 and 60 minutes.



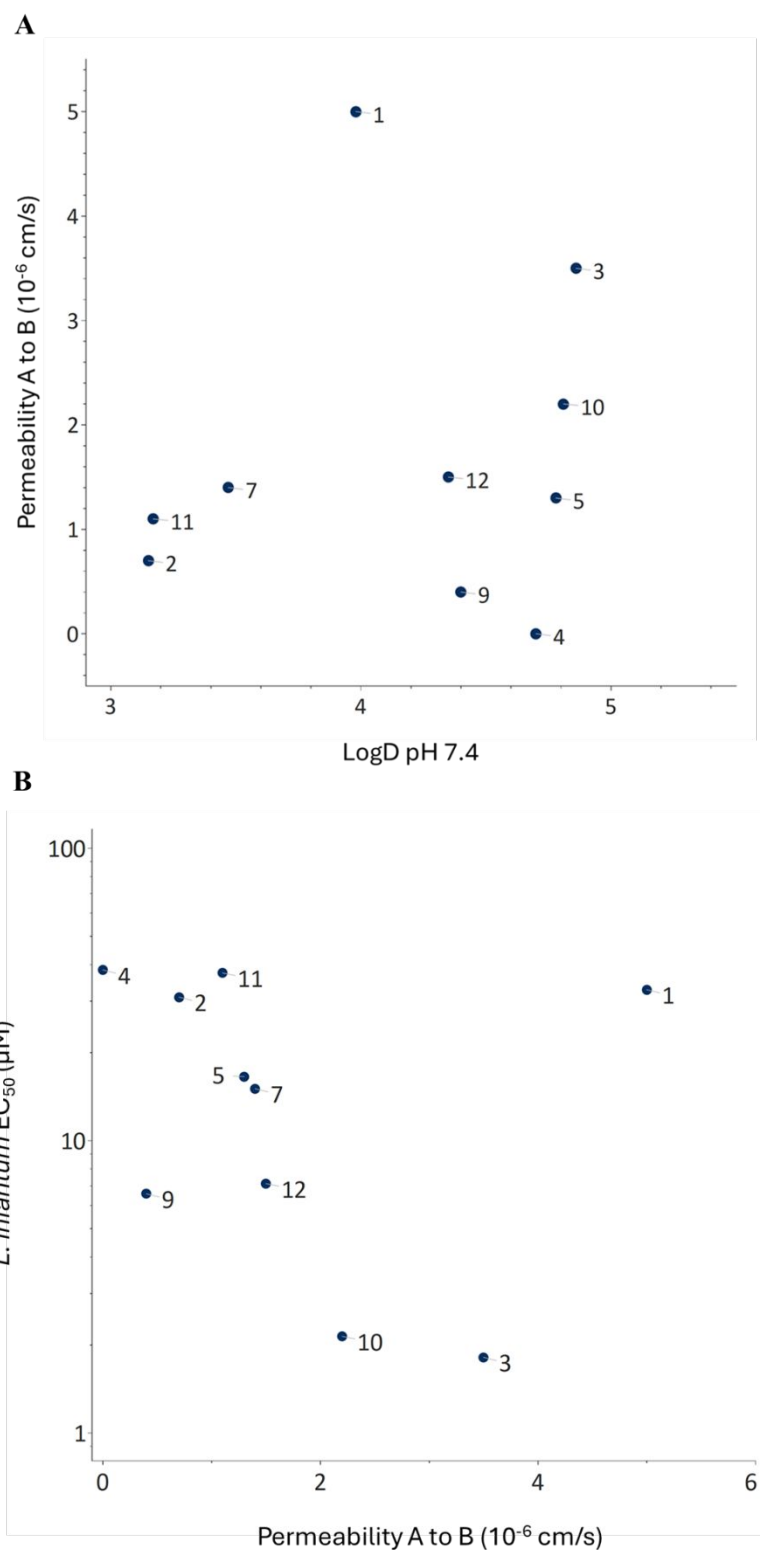

**Figure S4.** Correlations between **A**) the permeability across MDCK-MDR1 cell monolayers and  $\text{LogD}_{7.4}$  and **B**) the potency for inhibition of the growth of *L. infantum* and the cell permeability for compounds **1-12**.



### Compound 2: COSY NMR (CDCl<sub>3</sub>)

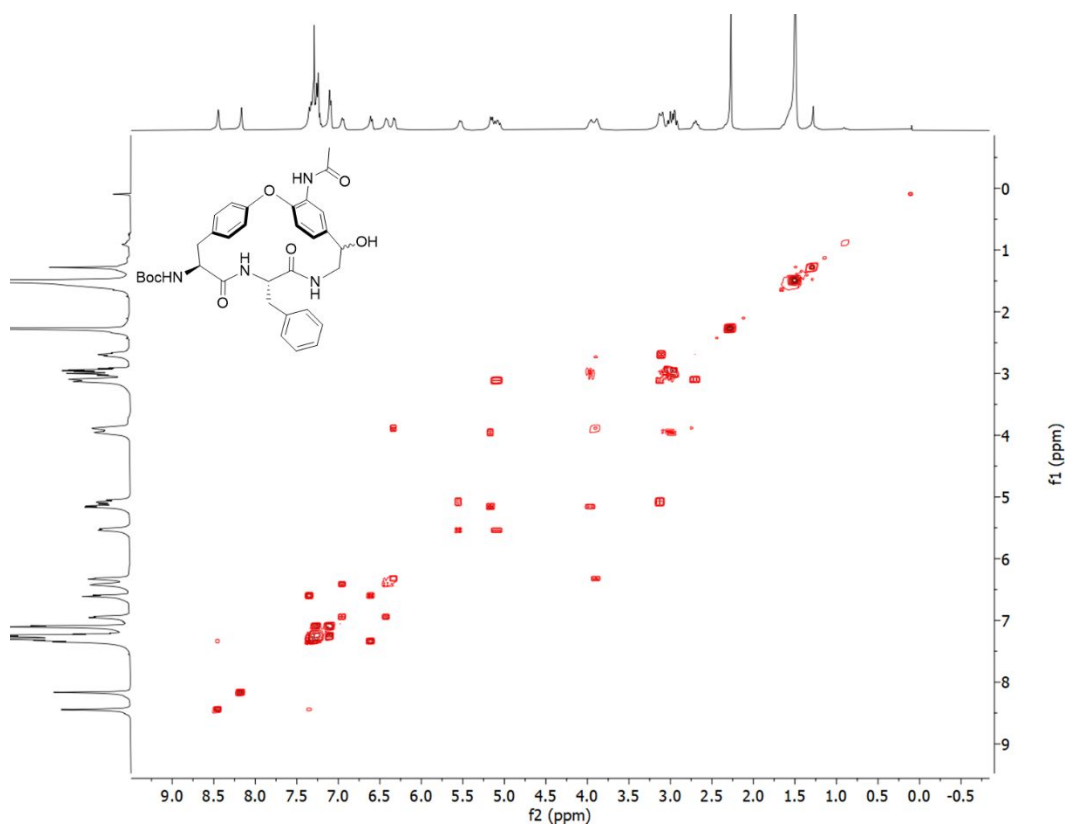

### Compound 2: HSQC NMR (CDCl<sub>3</sub>)

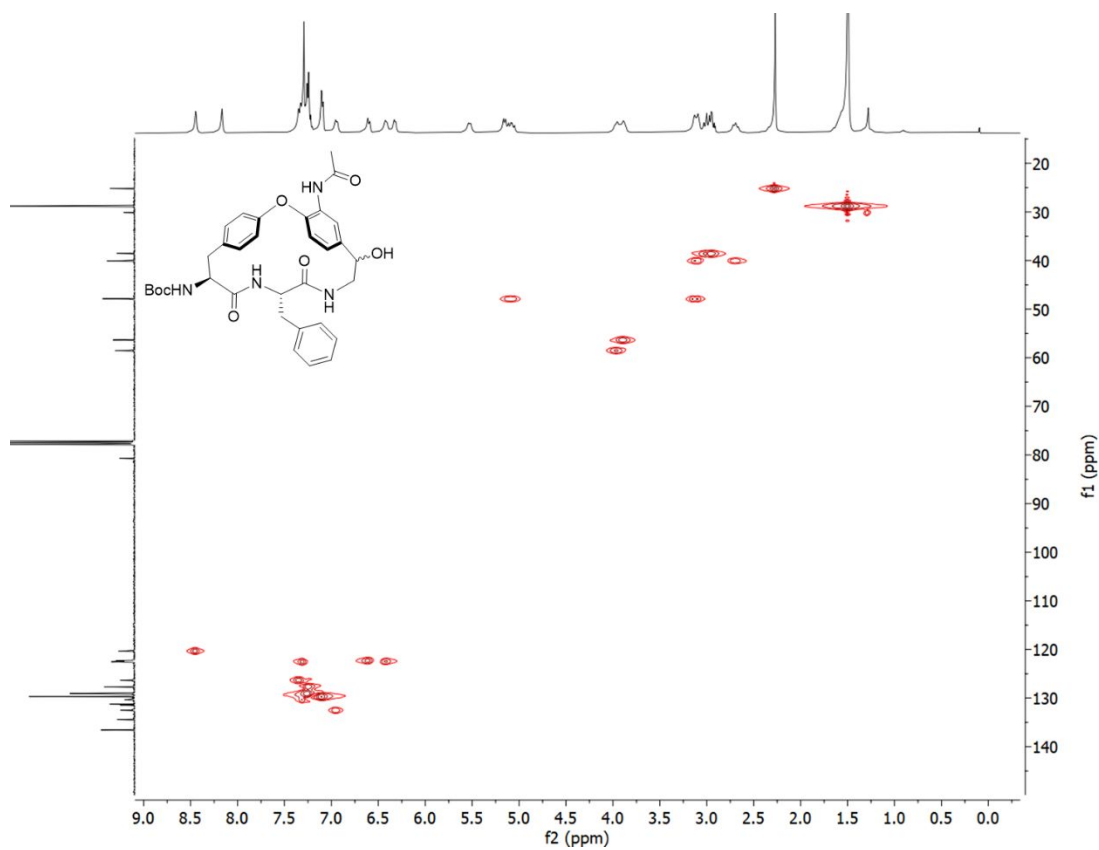



### Compound 3: $^{13}\text{C}$ NMR ( $\text{CDCl}_3$ , 150 MHz)

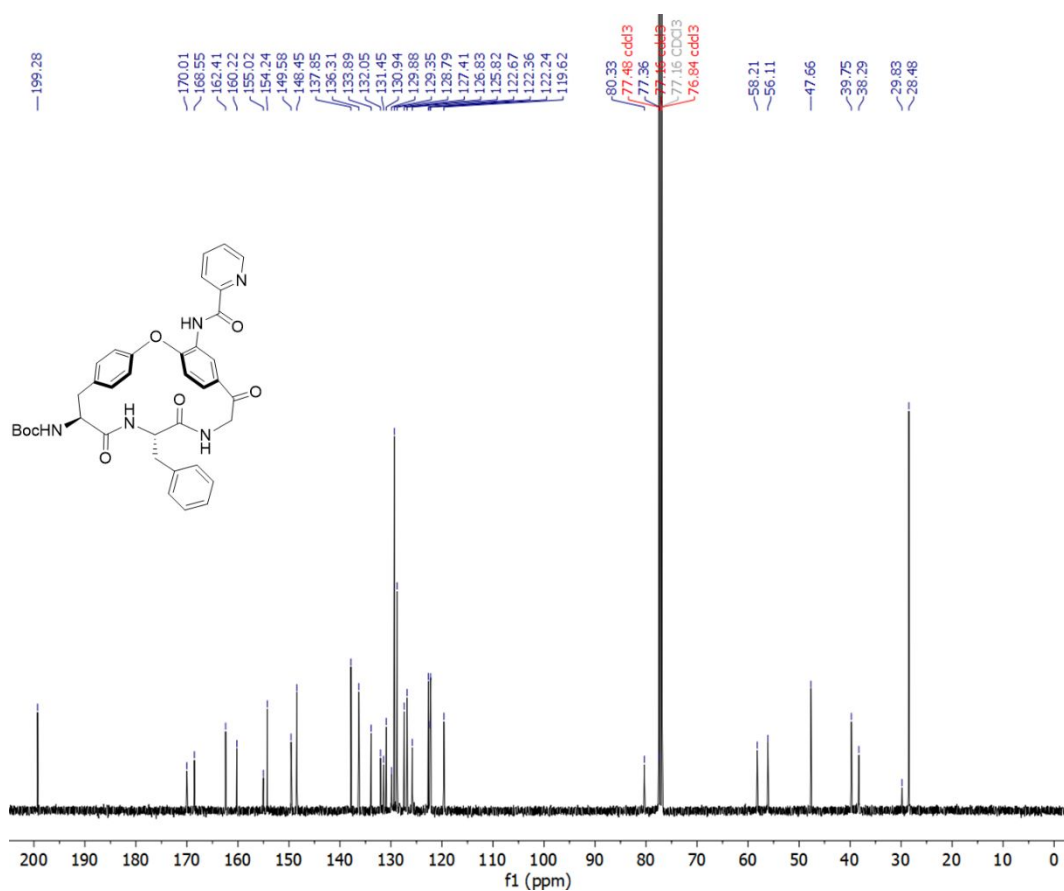

### Compound 3: COSY NMR ( $\text{CDCl}_3$ )

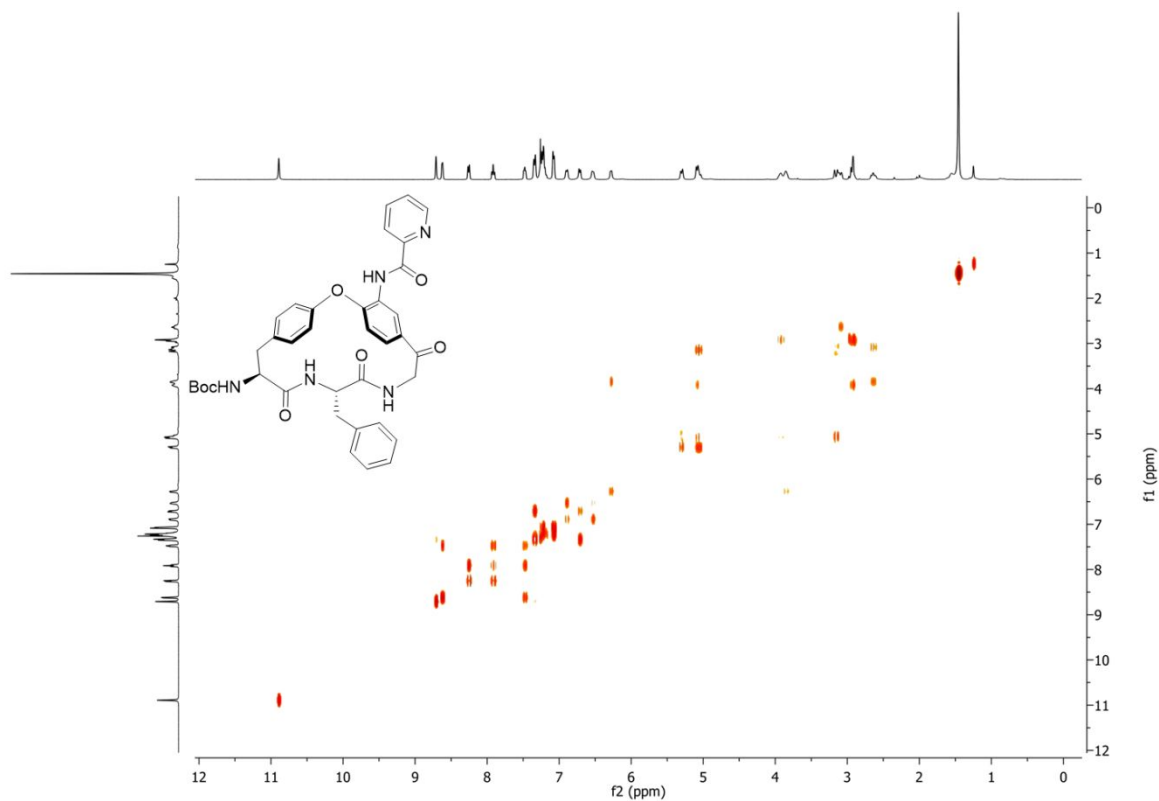

### Compound 3: HSQC NMR (CDCl<sub>3</sub>)

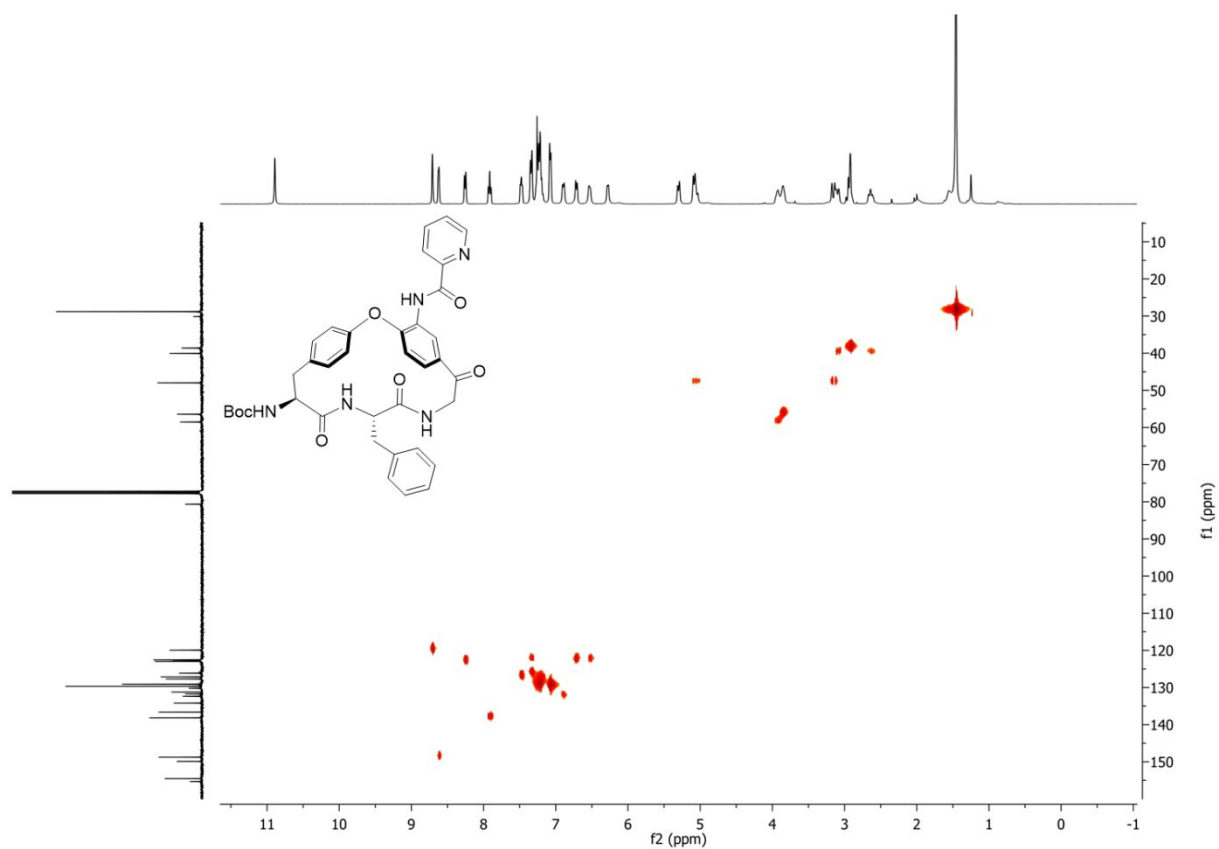

### Compound 3: HMBC NMR (CDCl<sub>3</sub>)

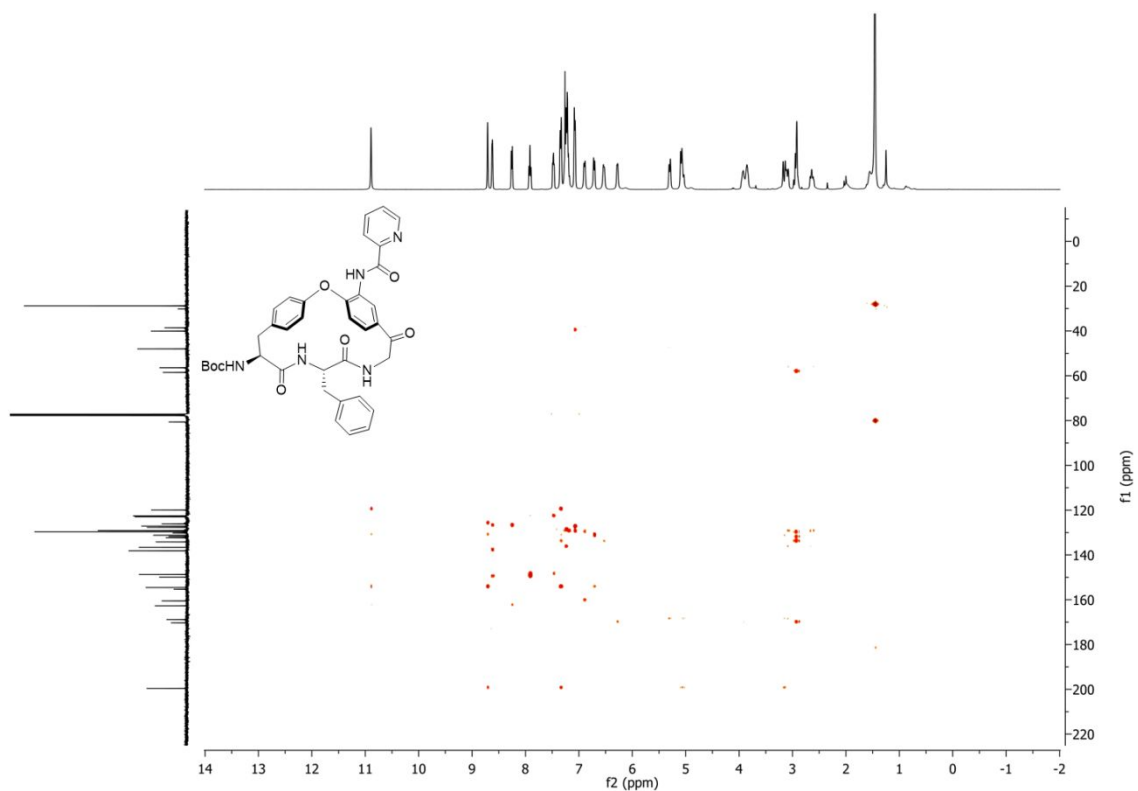

**Compound 4:  $^1\text{H}$  NMR ( $\text{CD}_3\text{CN}$ , 500 MHz)**

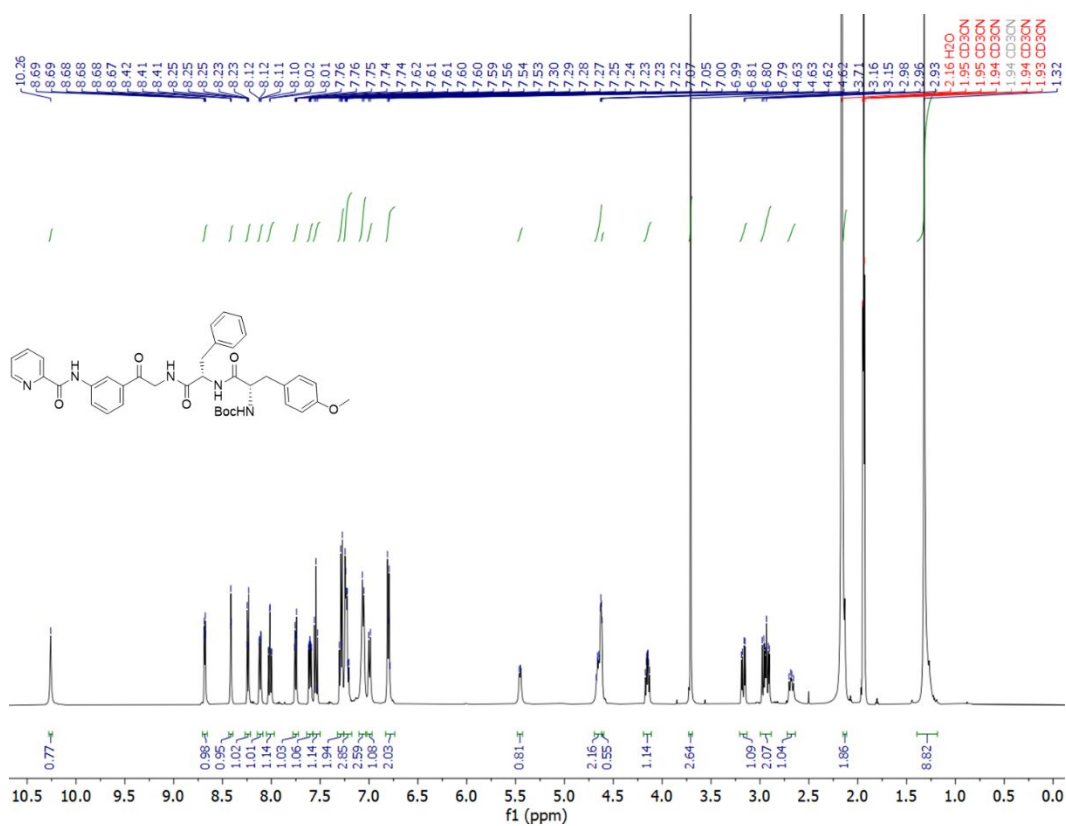

**Compound 4:  $^{13}\text{C}$  NMR ( $\text{CD}_3\text{CN}$ , 125 MHz)**

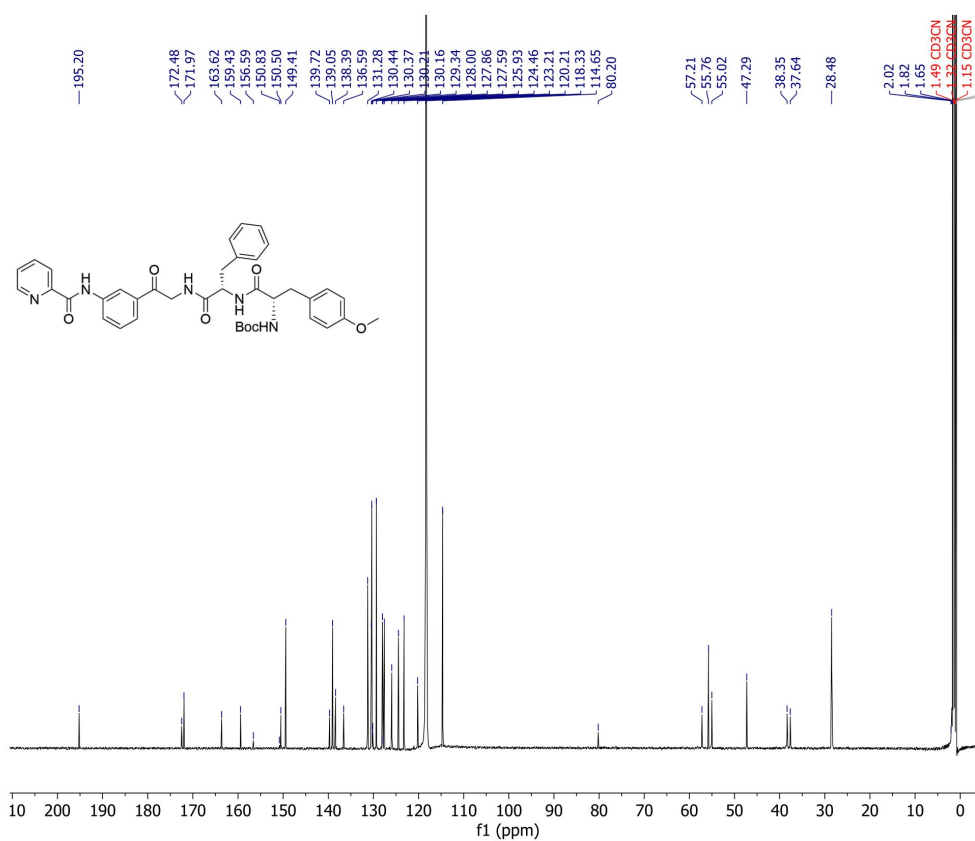

**Compound 4: COSY NMR (CD<sub>3</sub>CN)**

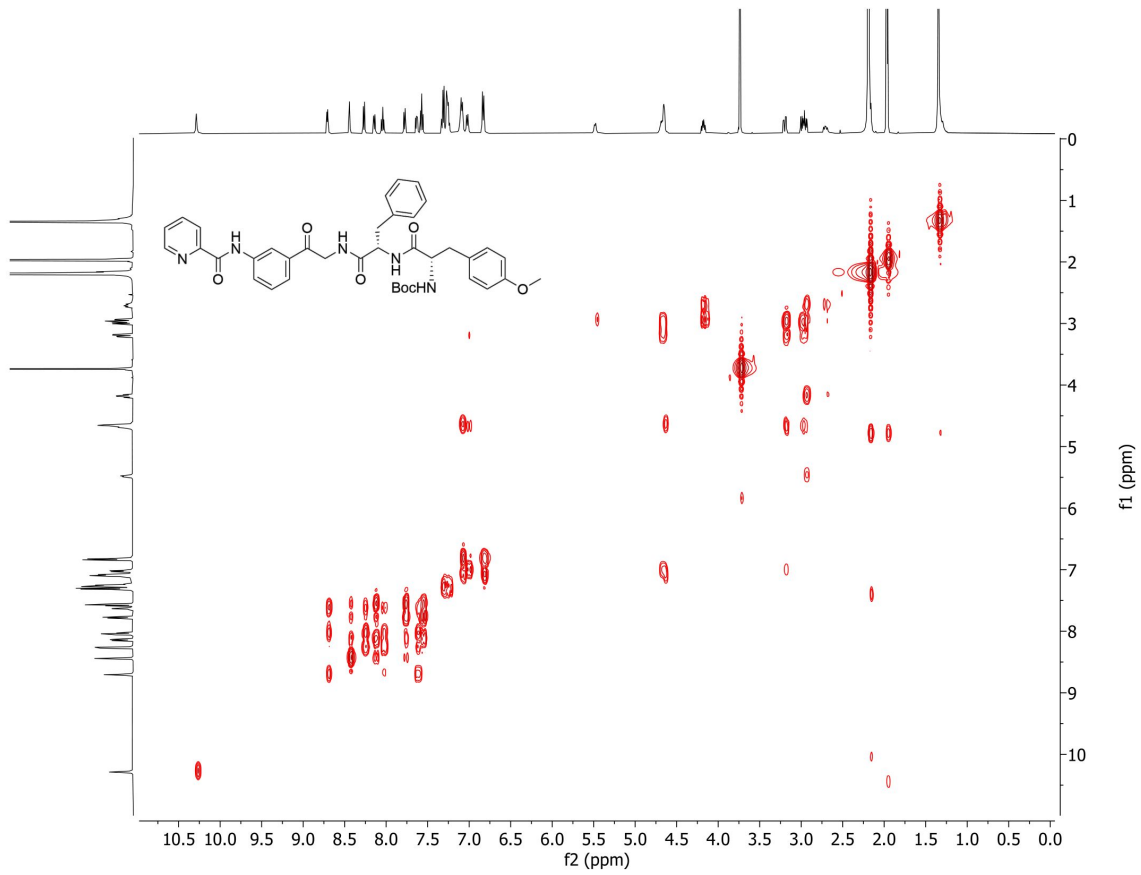

**Compound 4: HSQC NMR (CD<sub>3</sub>CN)**

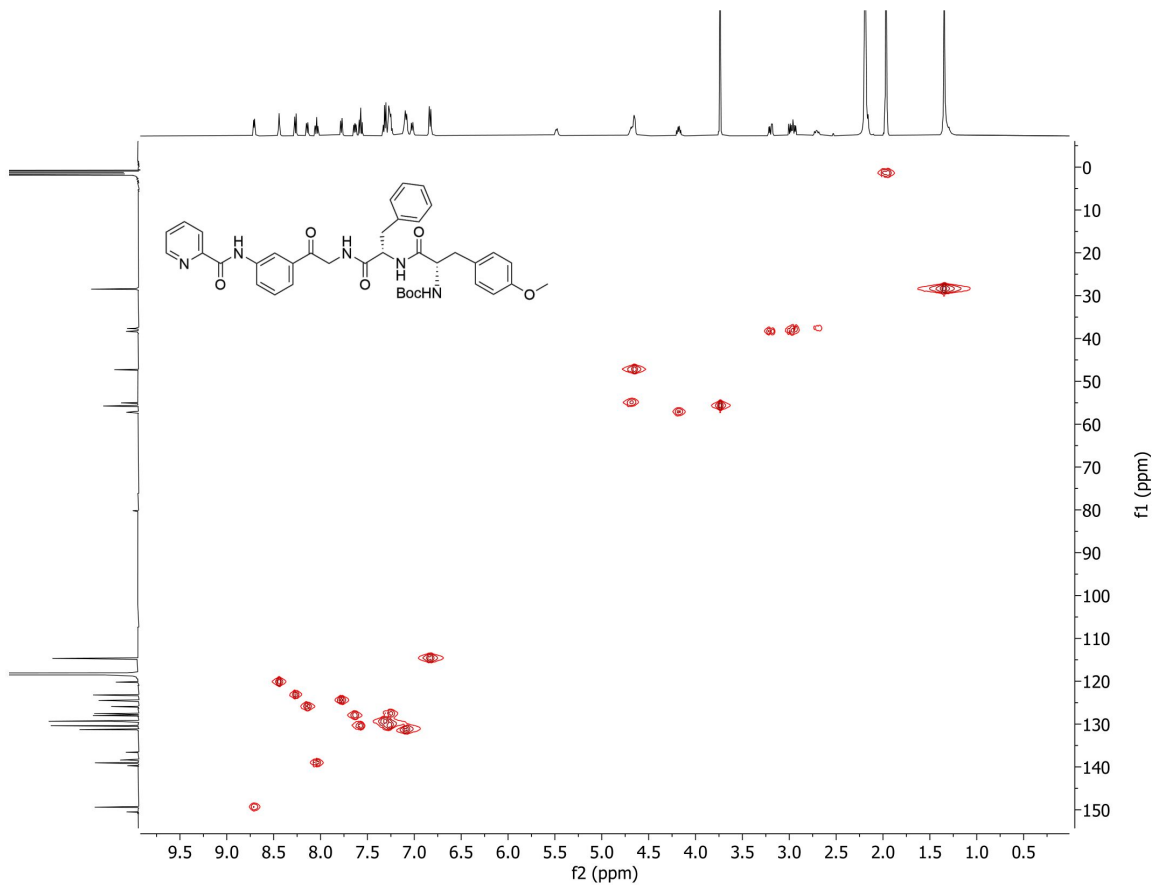



**Compound 4: HMBC NMR (CD<sub>3</sub>CN)**

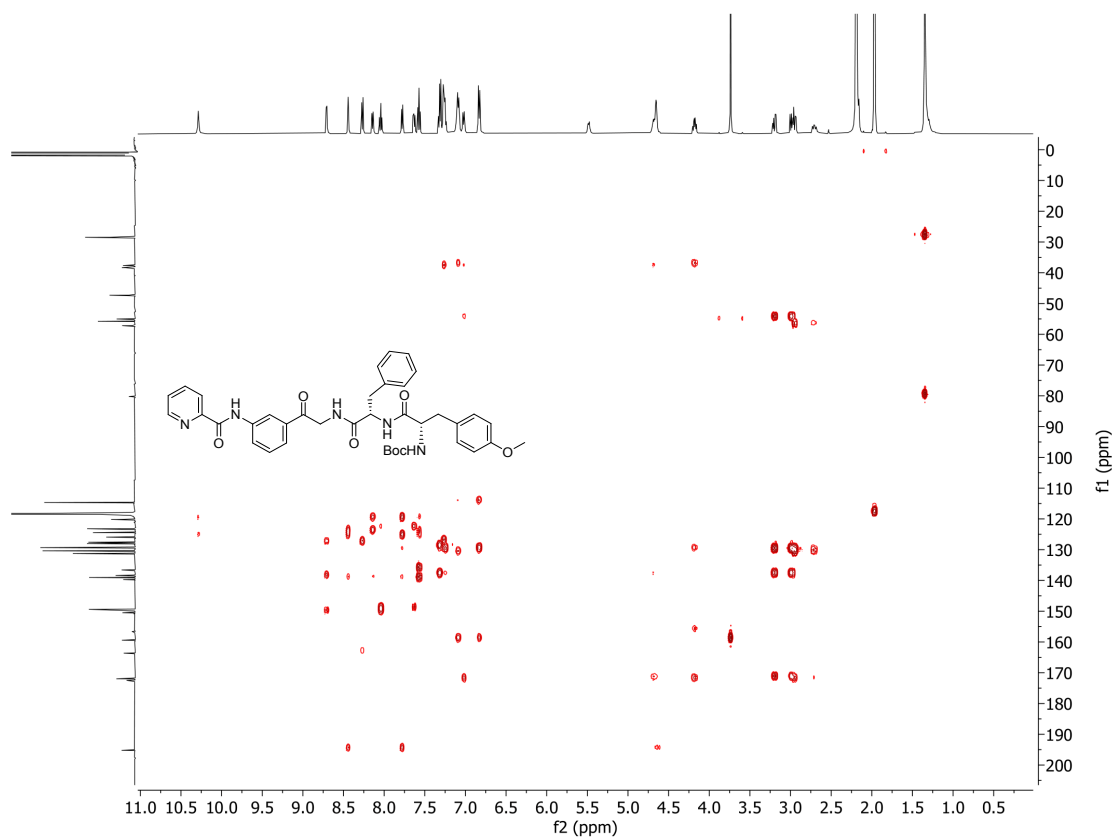

**Compound 5: <sup>1</sup>H NMR (CDCl<sub>3</sub>, 600 MHz)**

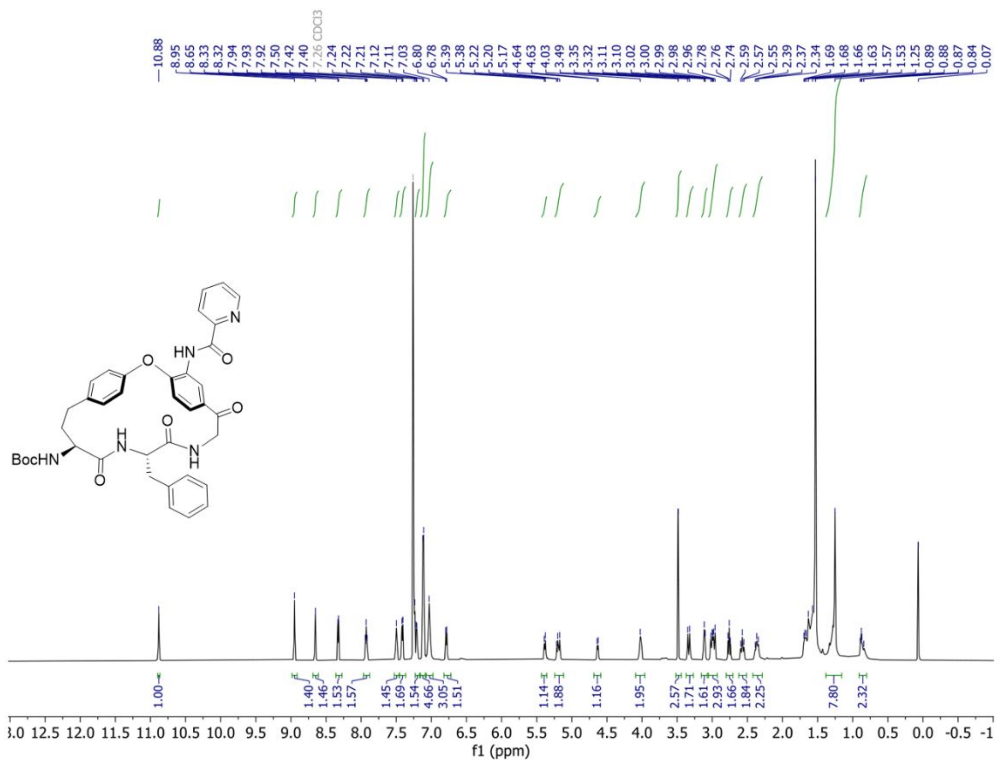

**Compound 5:  $^{13}\text{C}$  NMR ( $\text{CDCl}_3$ , 150 MHz)**

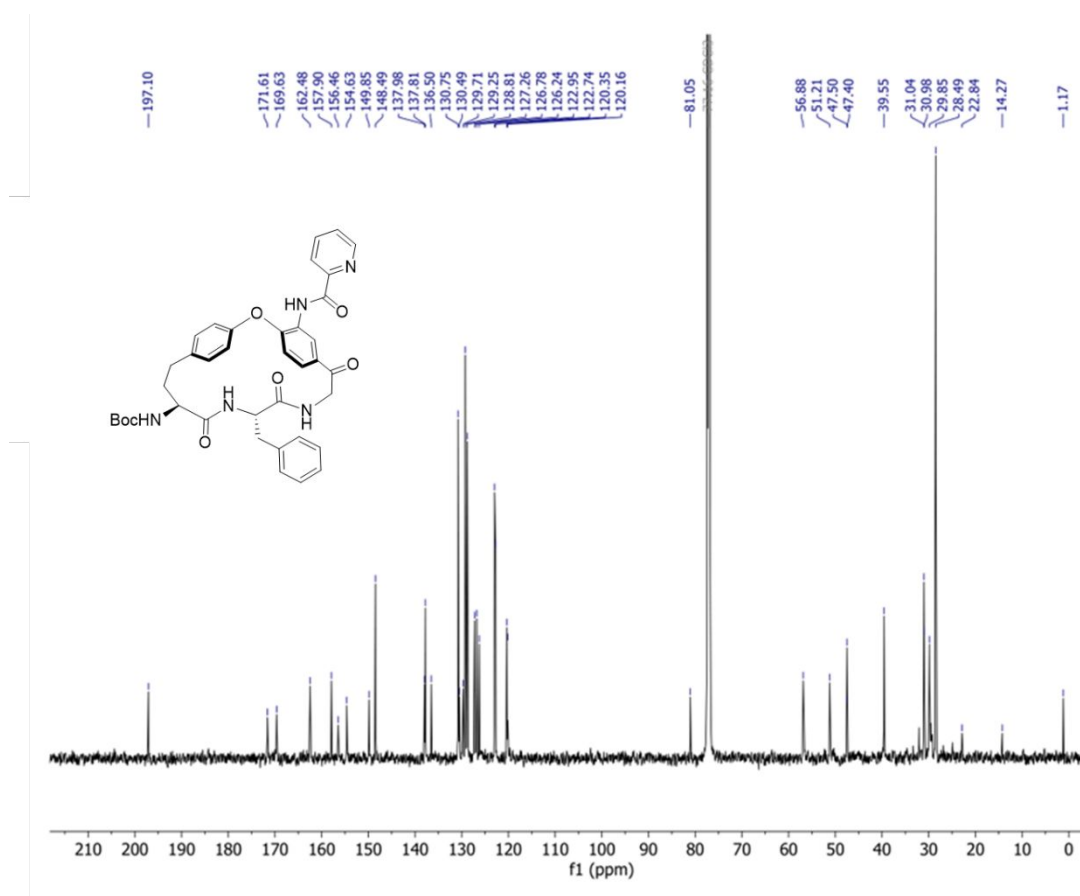

**Compound 5: COSY NMR ( $\text{CDCl}_3$ )**

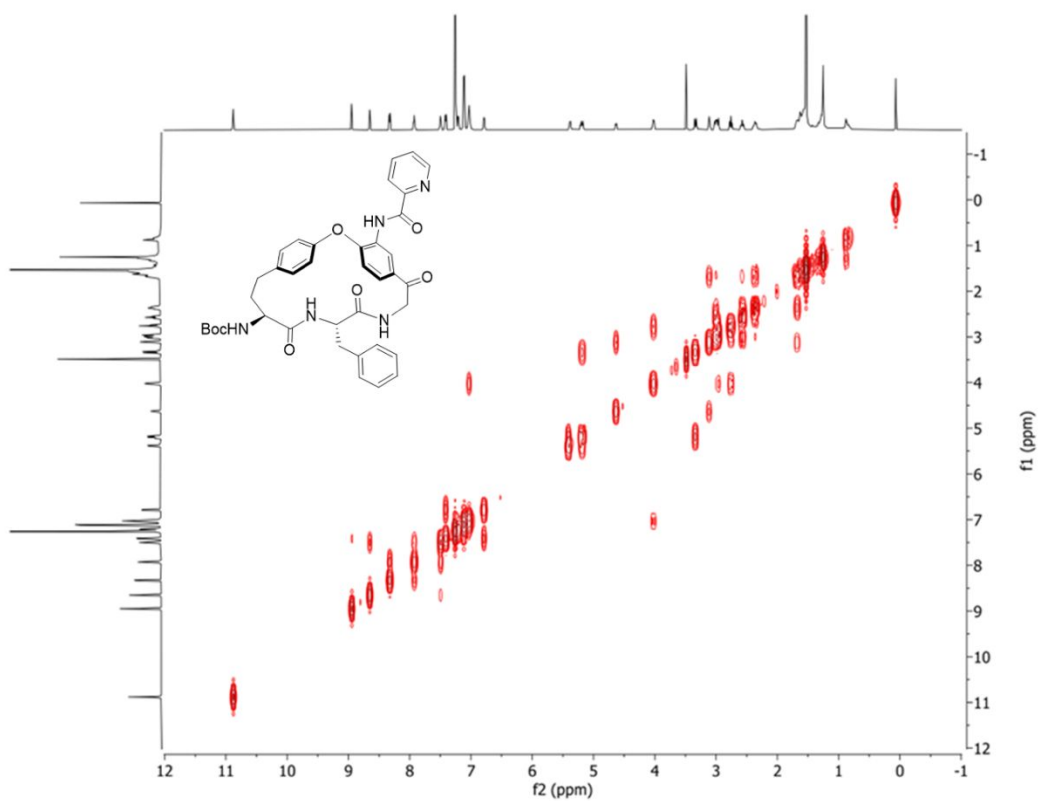

**Compound 5: HSQC NMR (CDCl<sub>3</sub>)**

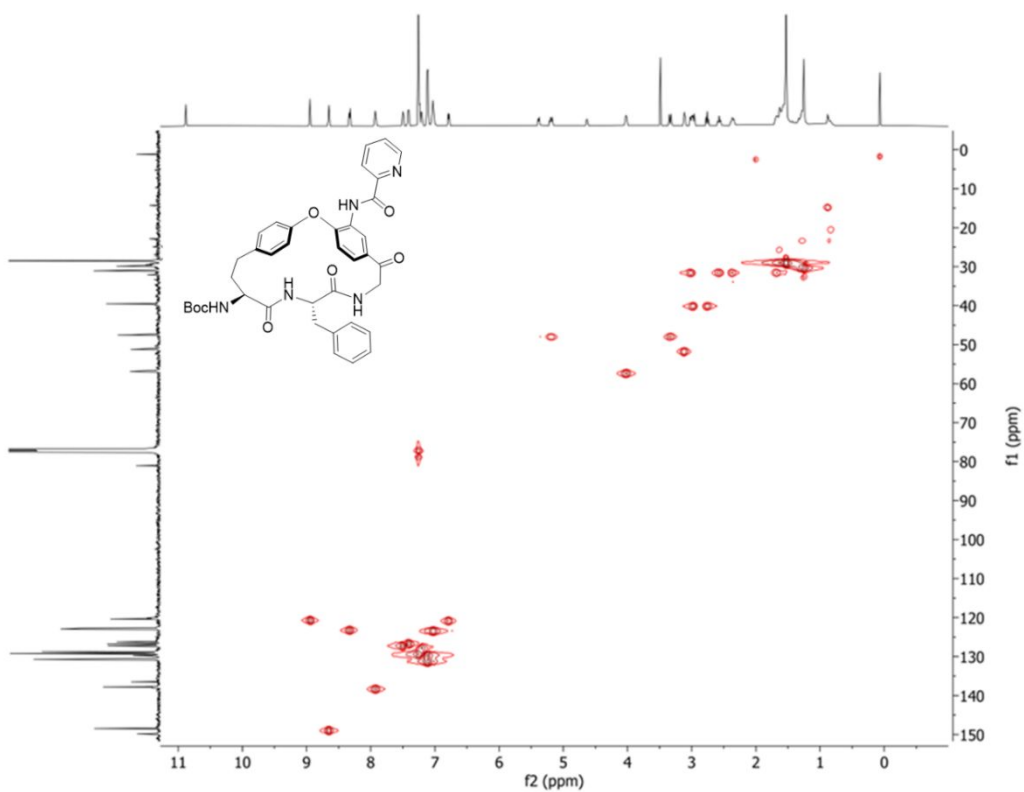

**Compound 5: HMBC NMR (CDCl<sub>3</sub>)**

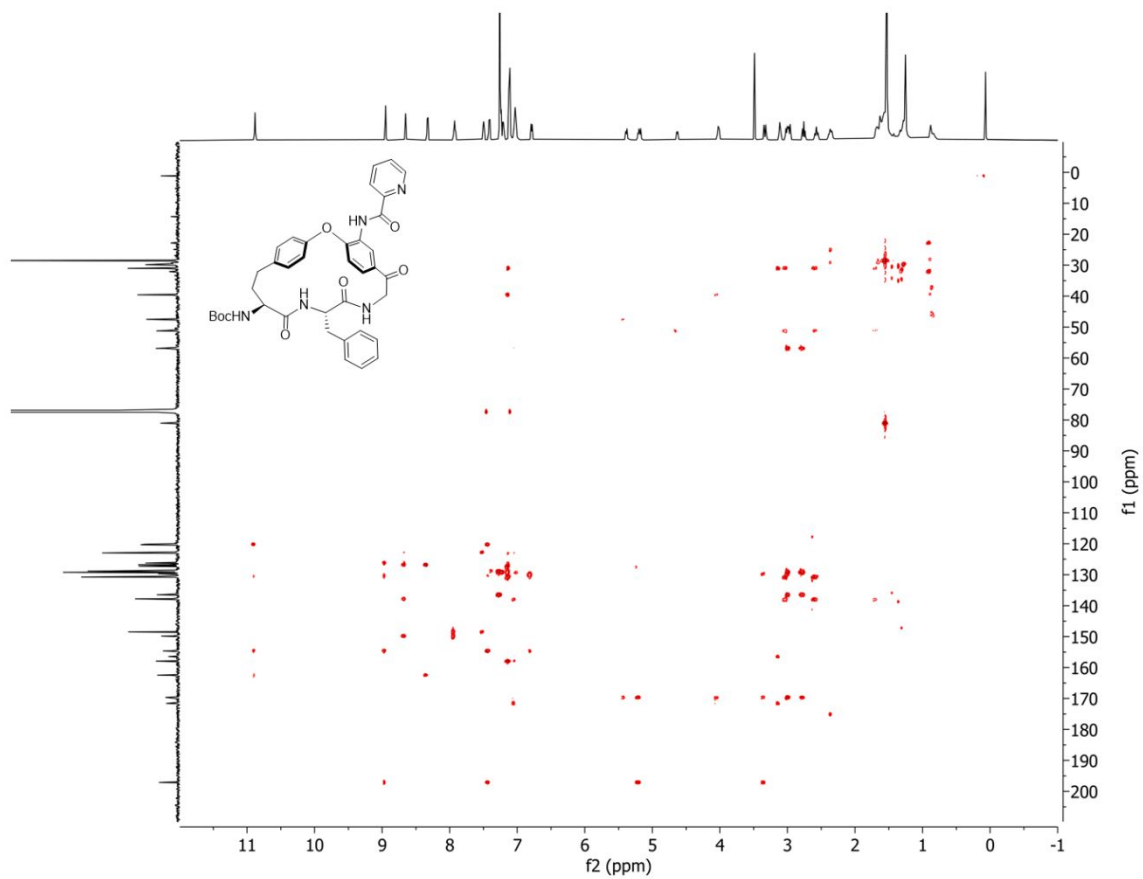



### Compound 6: COSY NMR (CD<sub>3</sub>CN)

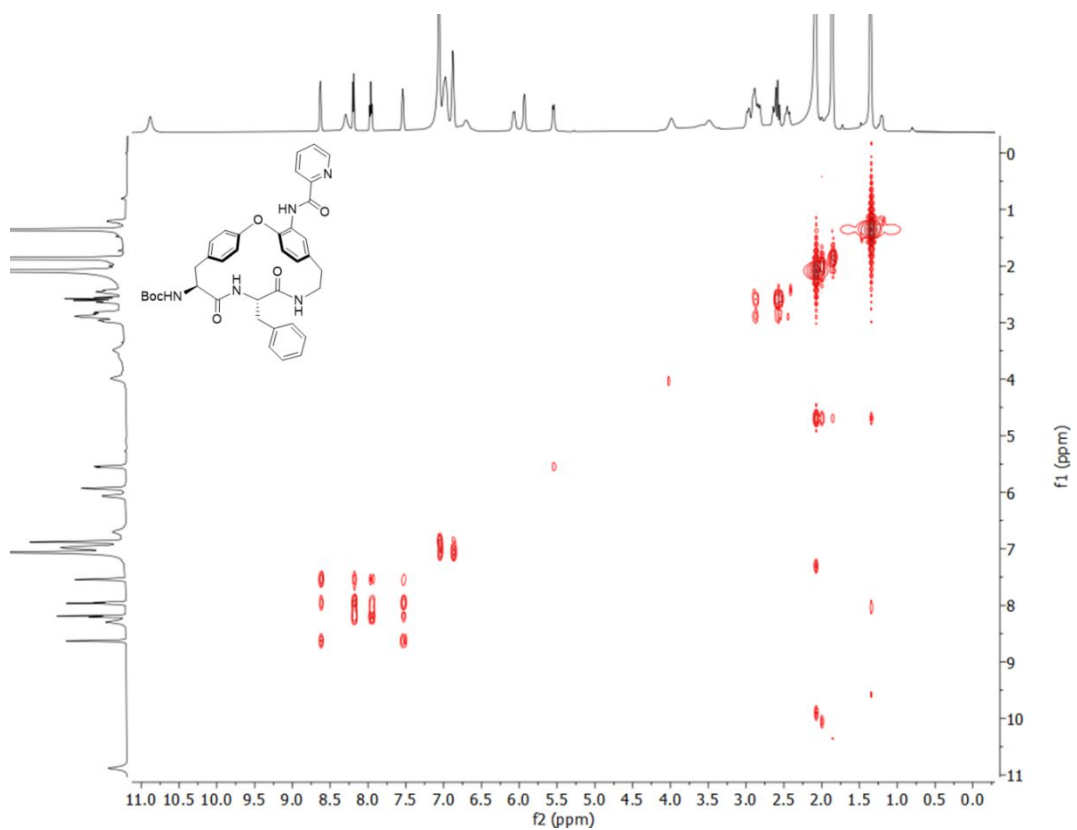

### Compound 6: HSQC NMR (CD<sub>3</sub>CN)

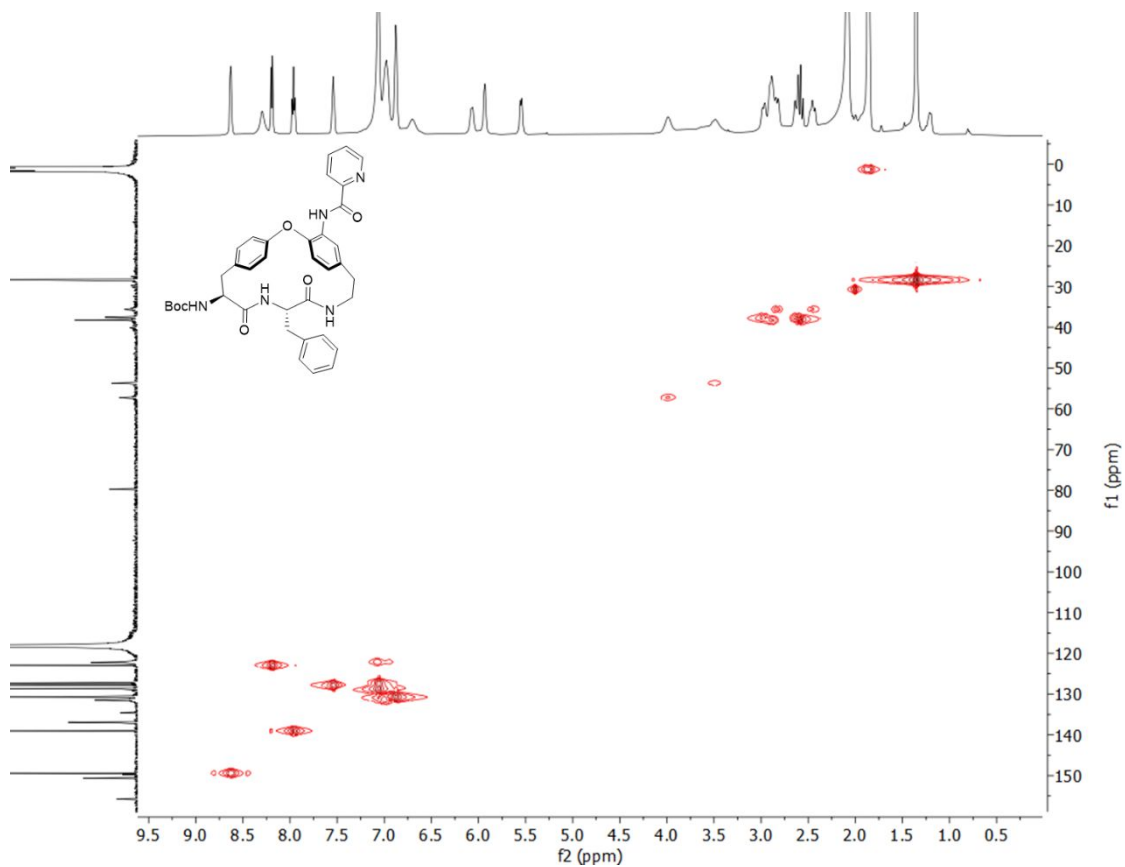

**Compound 6: HMBC NMR (CD<sub>3</sub>CN)**

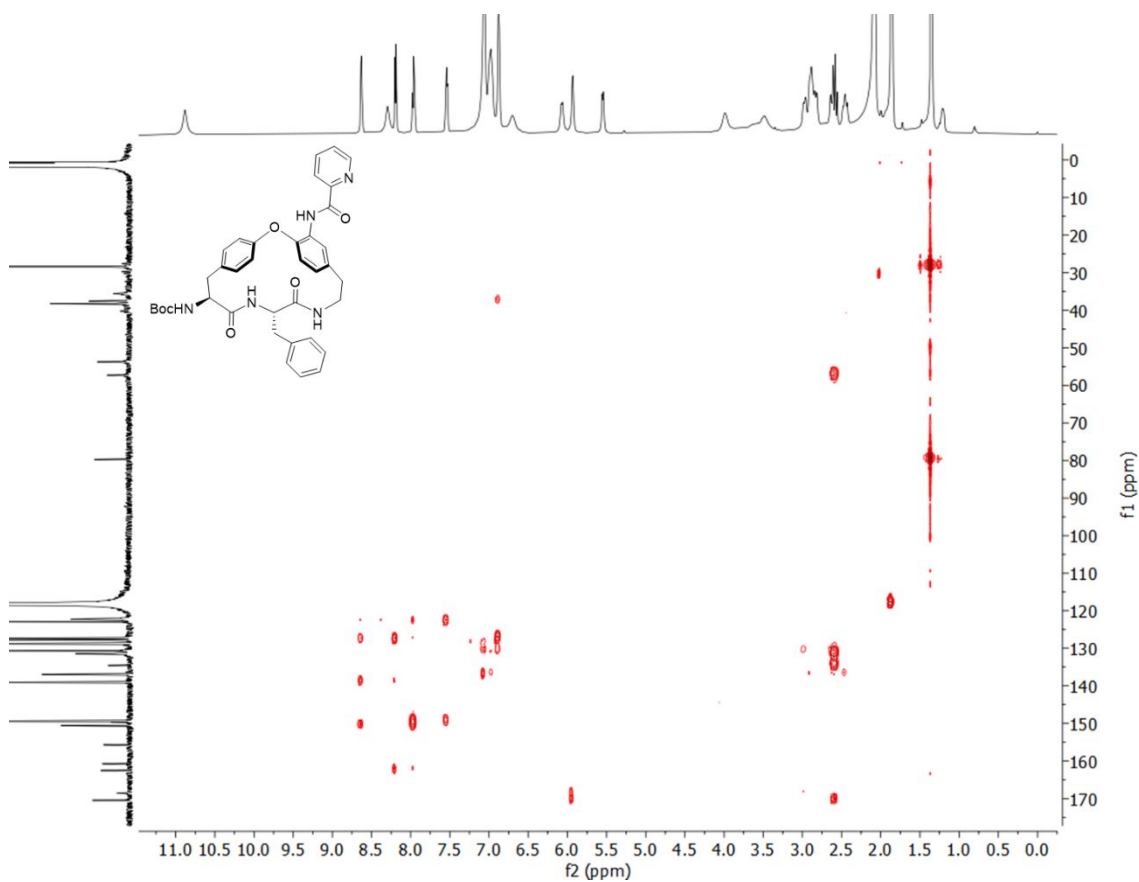

**Compound 7: <sup>1</sup>H NMR (CD<sub>3</sub>CN, 500 MHz)**

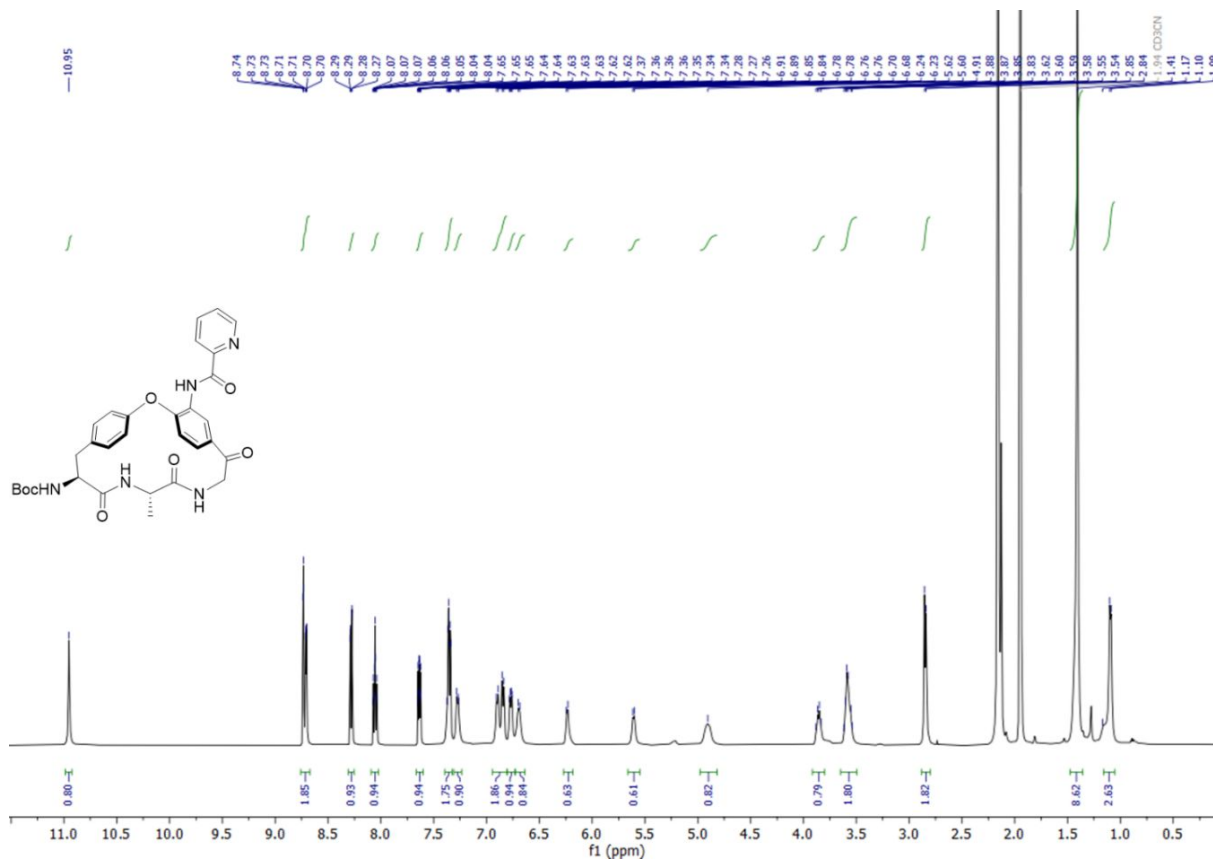

### Compound 7: <sup>13</sup>C NMR (CD<sub>3</sub>CN, 125 MHz)

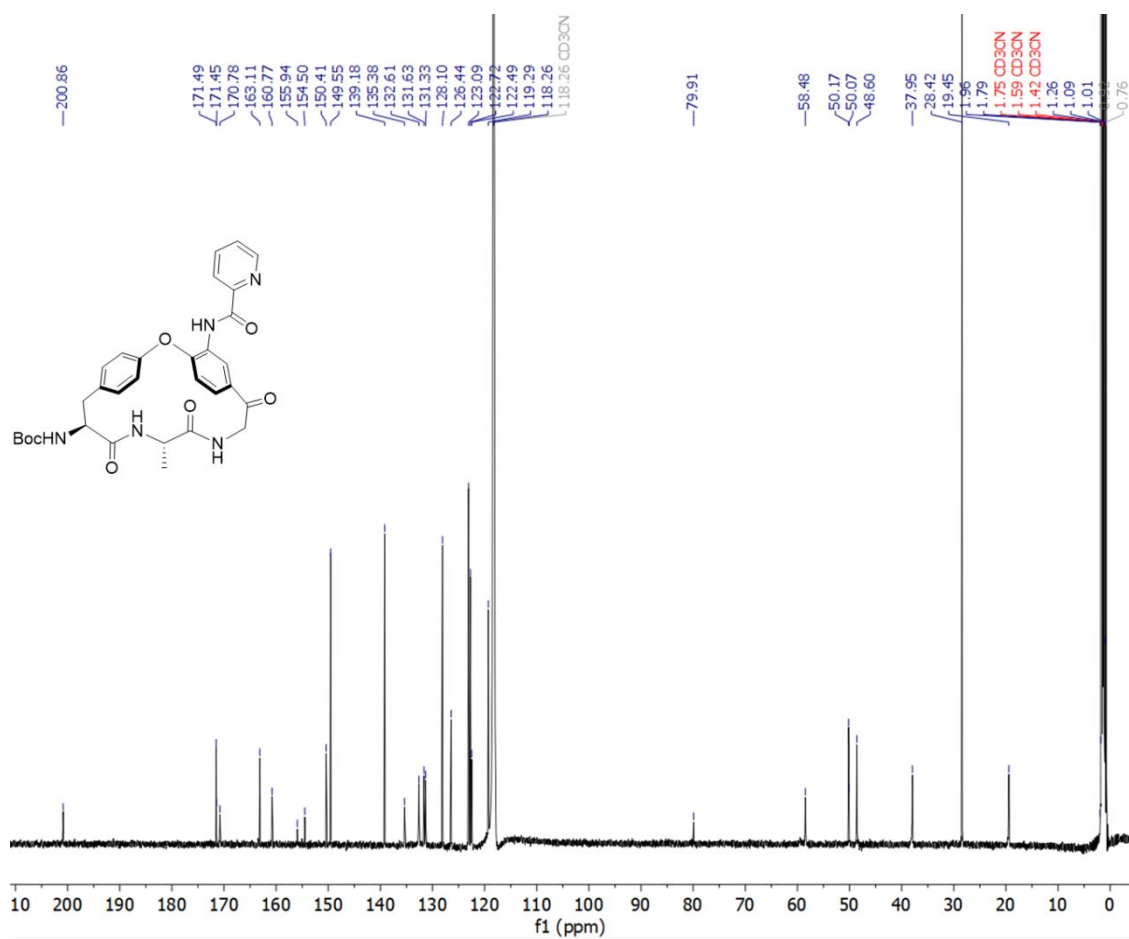

### Compound 7: COSY NMR (CD<sub>3</sub>CN)

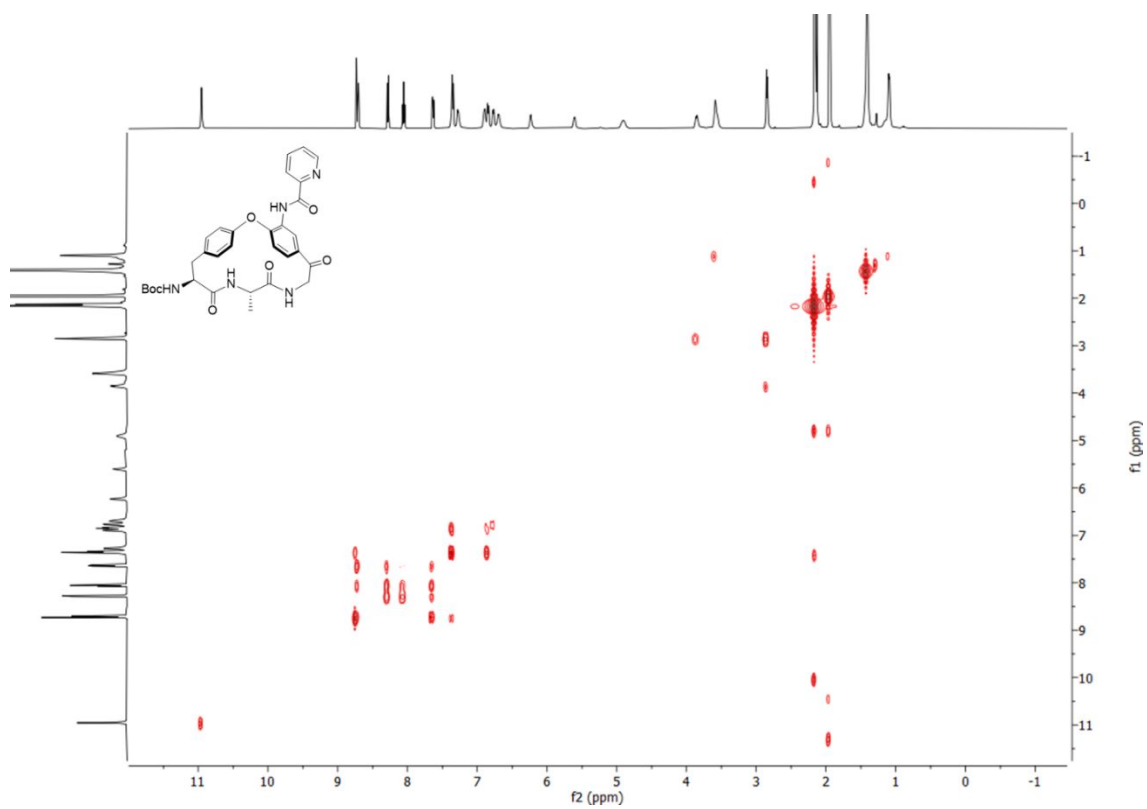

### Compound 7: HSQC NMR (CD<sub>3</sub>CN)

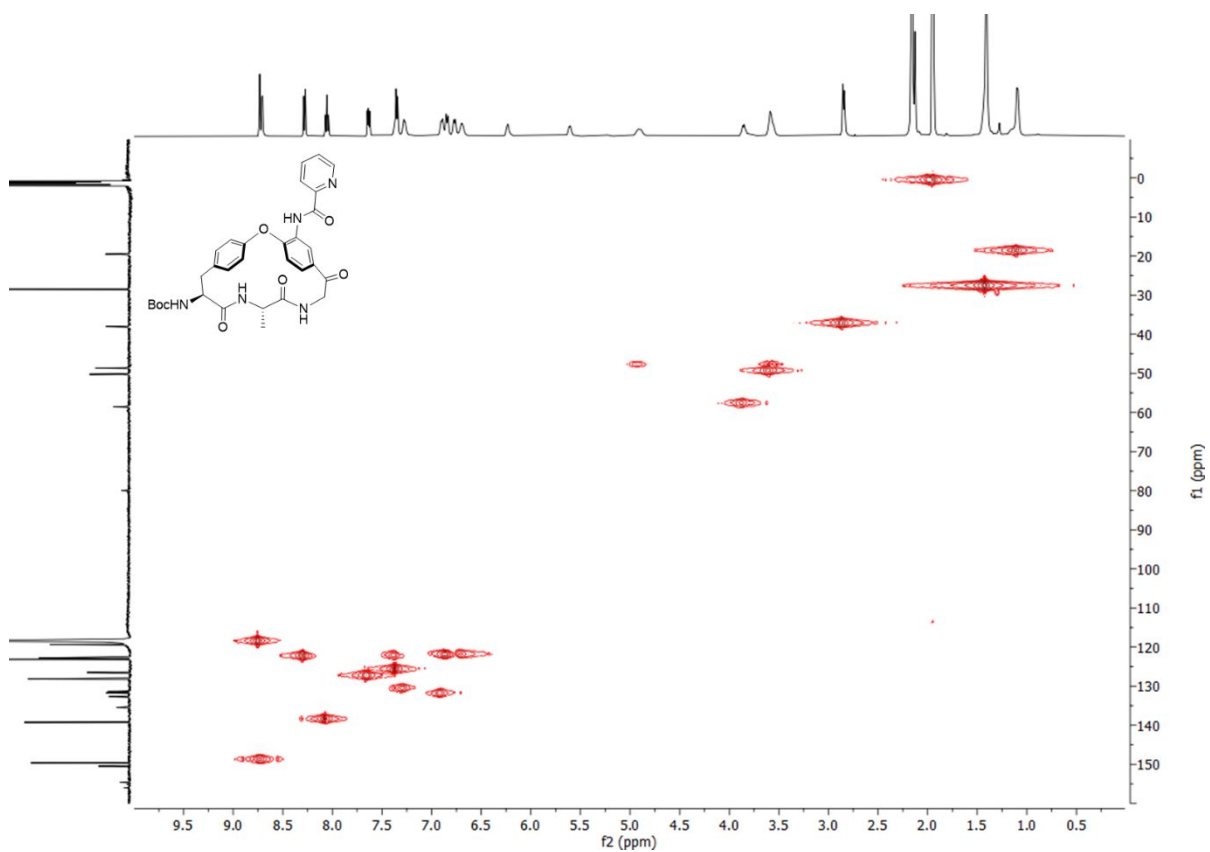

### Compound 7: HMBC NMR (CD<sub>3</sub>CN)

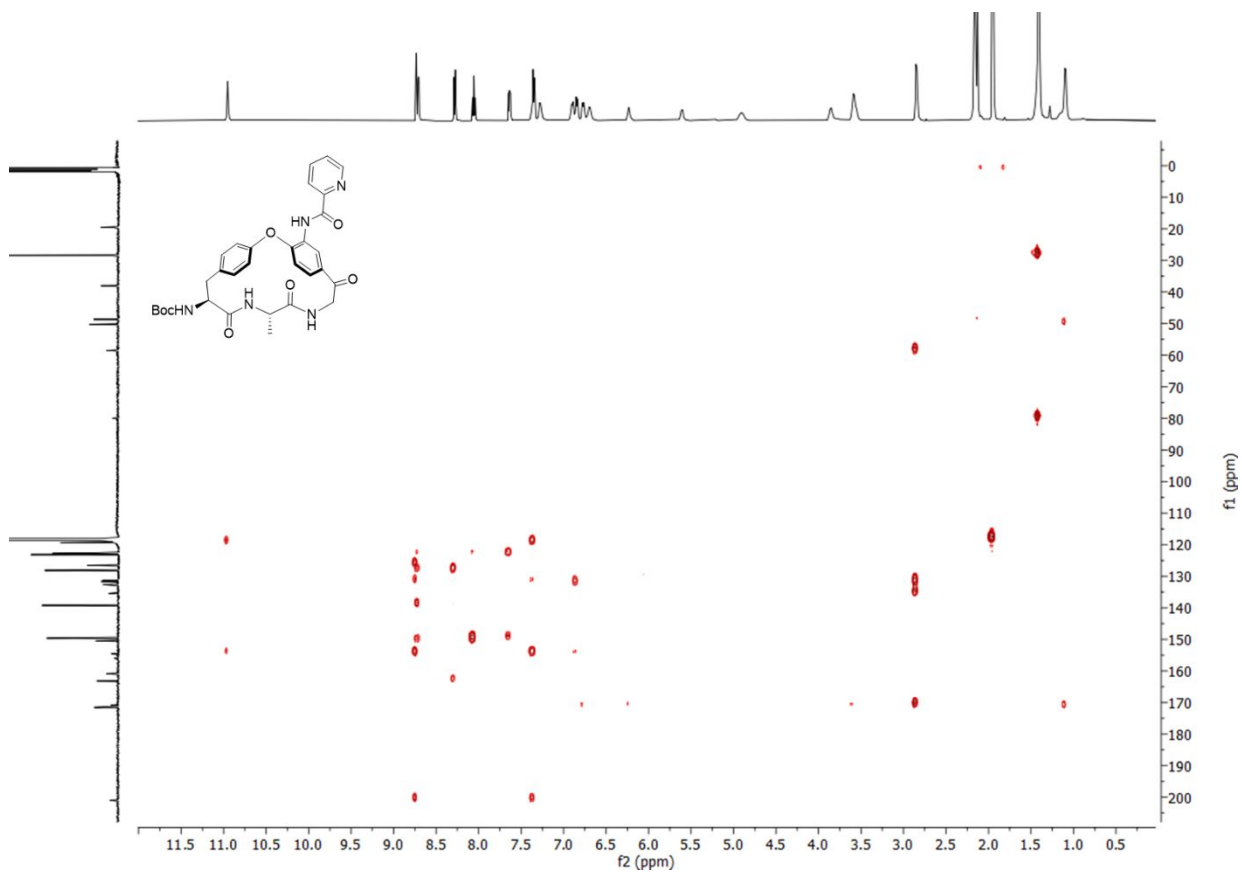



**Compound 8:  $^1\text{H}$  NMR ( $\text{CD}_3\text{CN}$ , 500 MHz)**

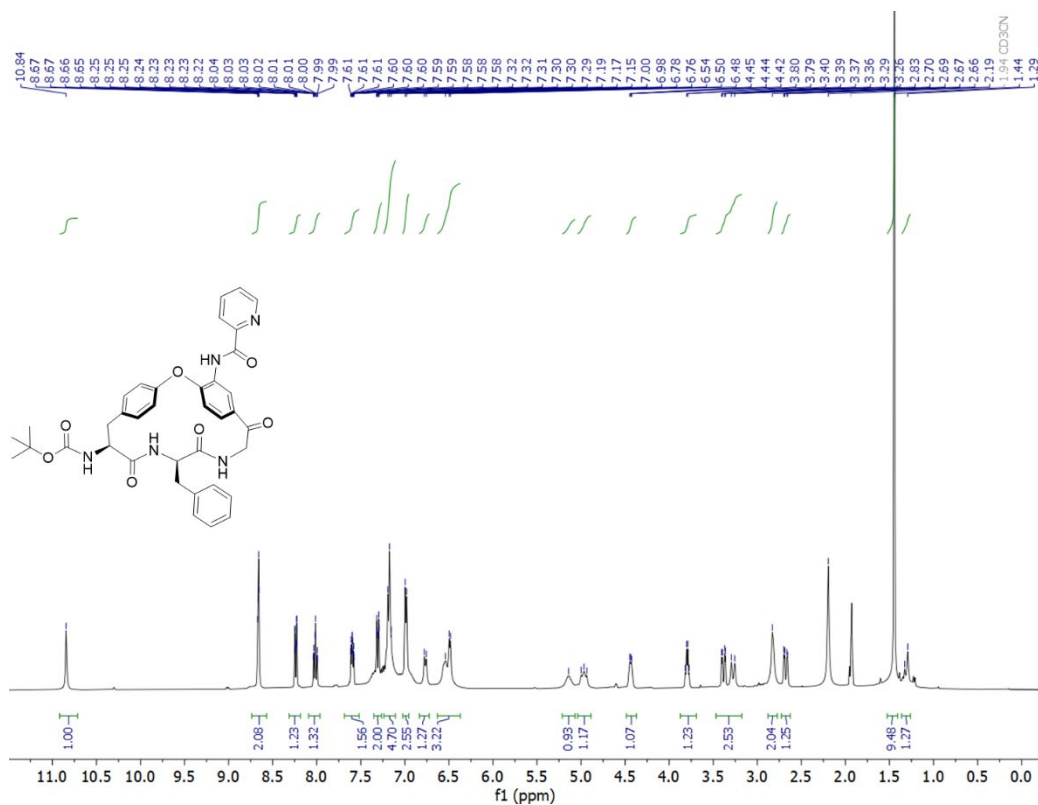

**Compound 8:  $^{13}\text{C}$  NMR ( $\text{CD}_3\text{CN}$ , 125 MHz)**

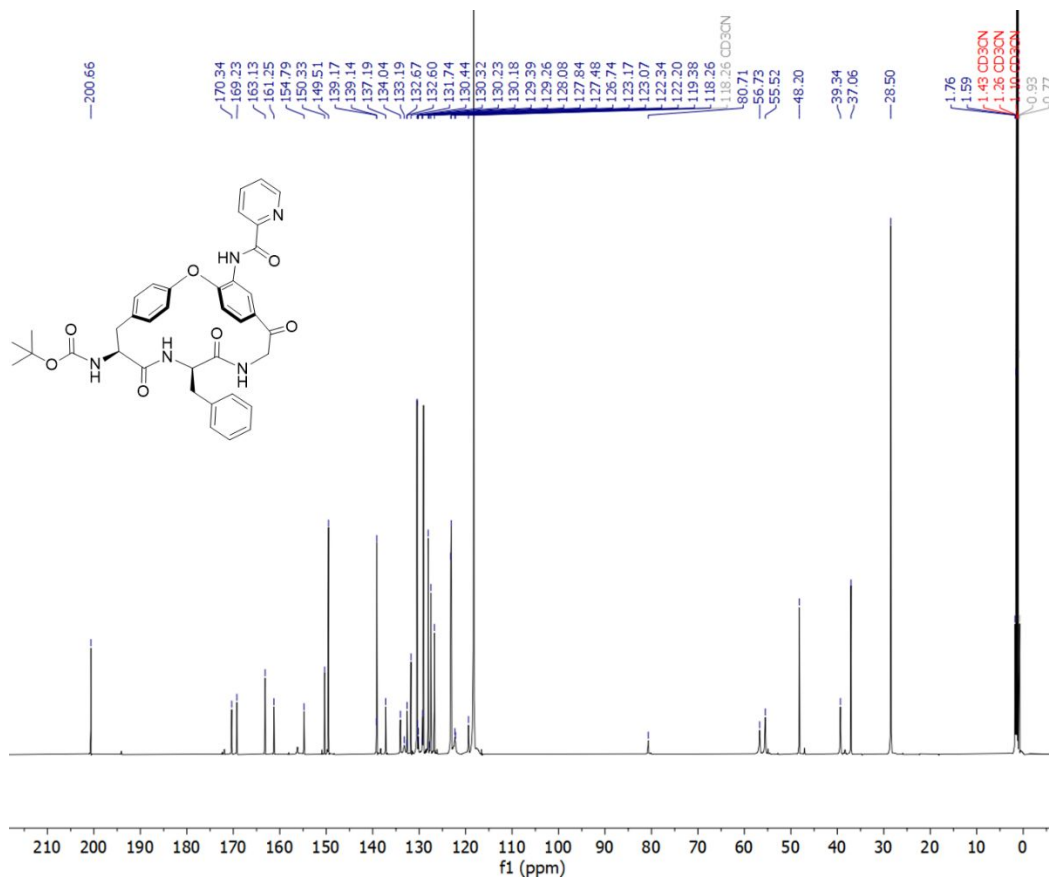

**Compound 8: COSY NMR (CD<sub>3</sub>CN)**

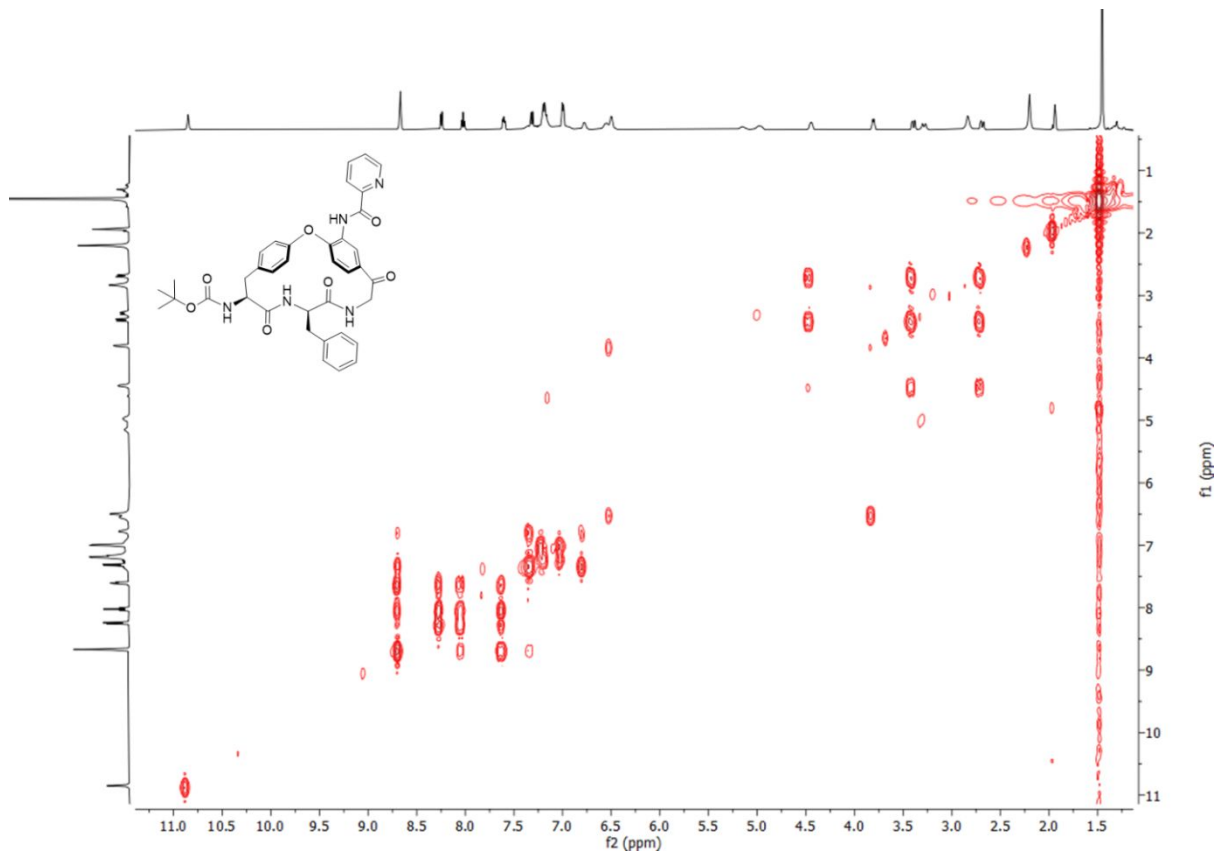

**Compound 8: HSQC NMR (CD<sub>3</sub>CN)**

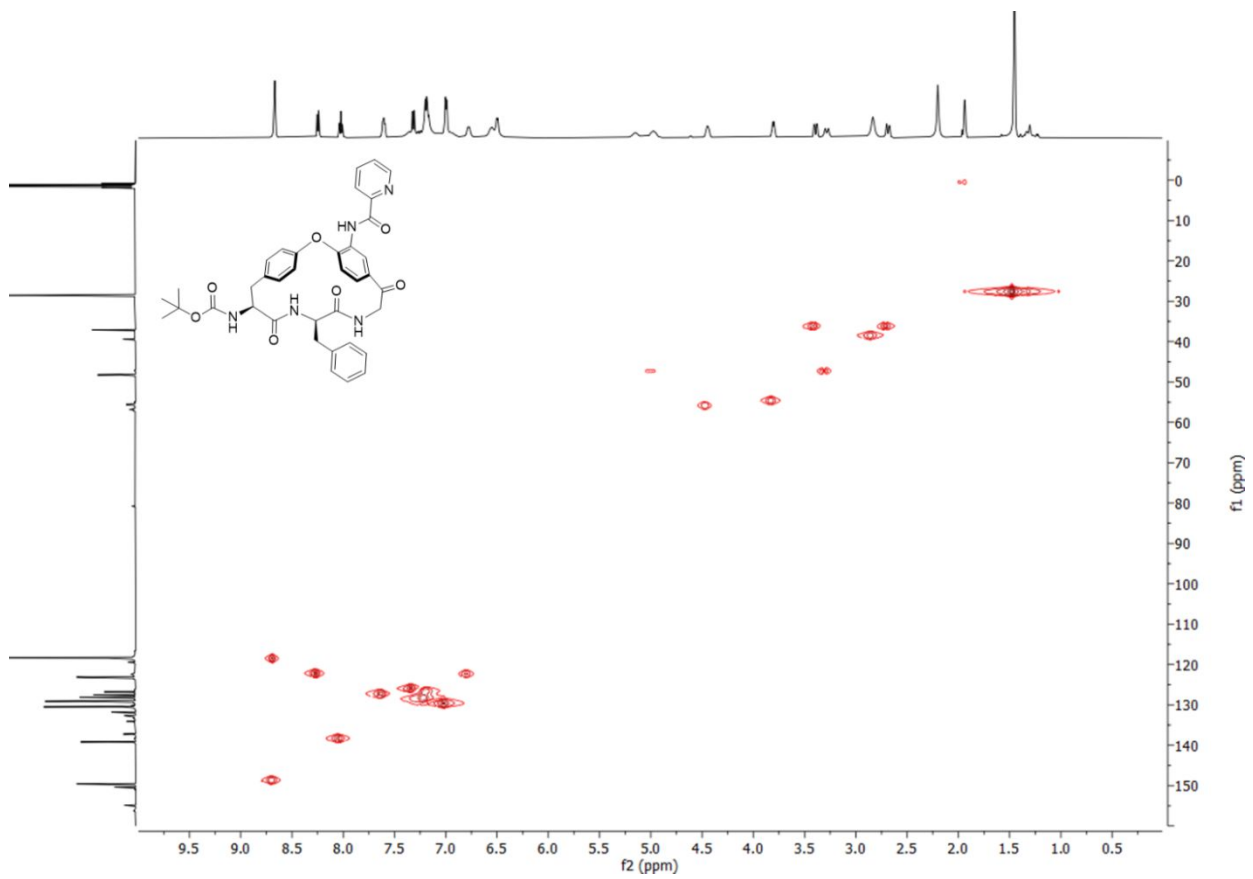

**Compound 8: HMBC NMR (CD<sub>3</sub>CN)**

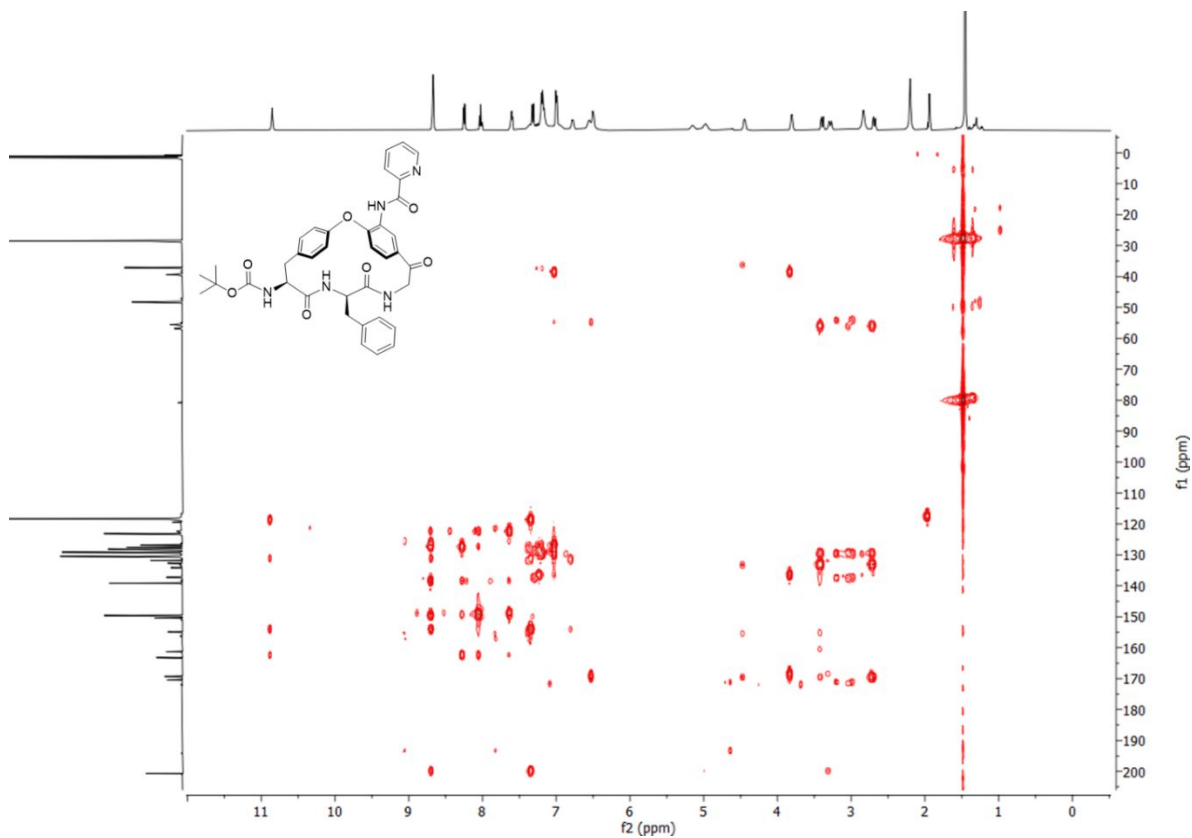

**Compound 9: <sup>1</sup>H NMR (CD<sub>3</sub>CN, 500 MHz)**

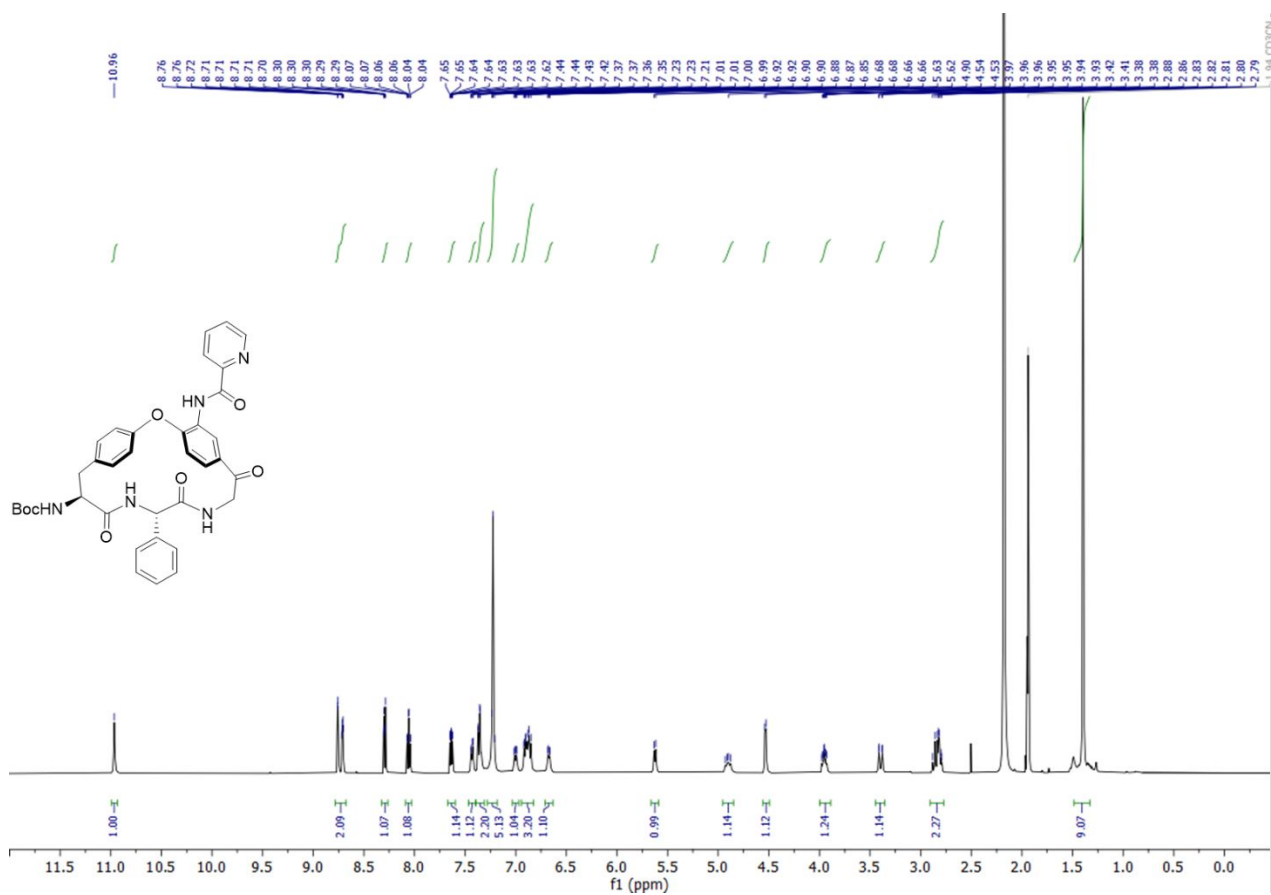

**Compound 9:  $^{13}\text{C}$  NMR ( $\text{CD}_3\text{CN}$ , 125 MHz)**

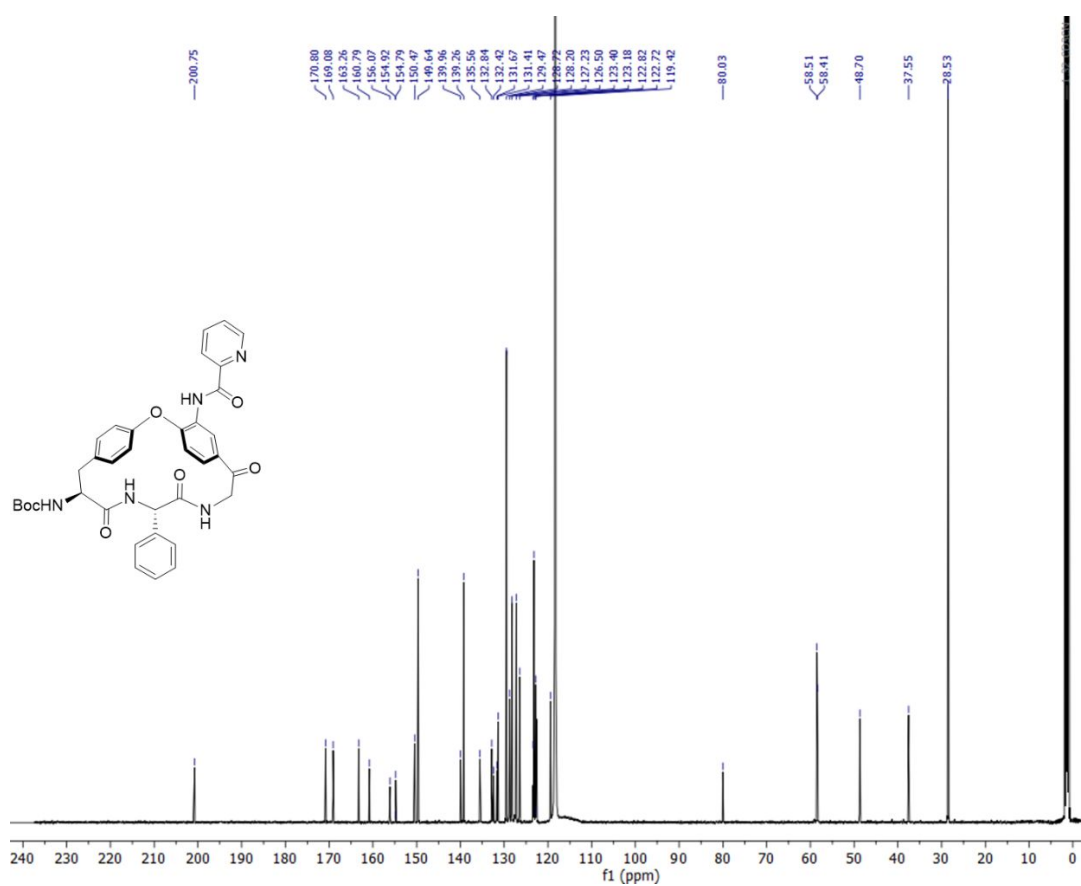

**Compound 9: COSY NMR ( $\text{CD}_3\text{CN}$ )**

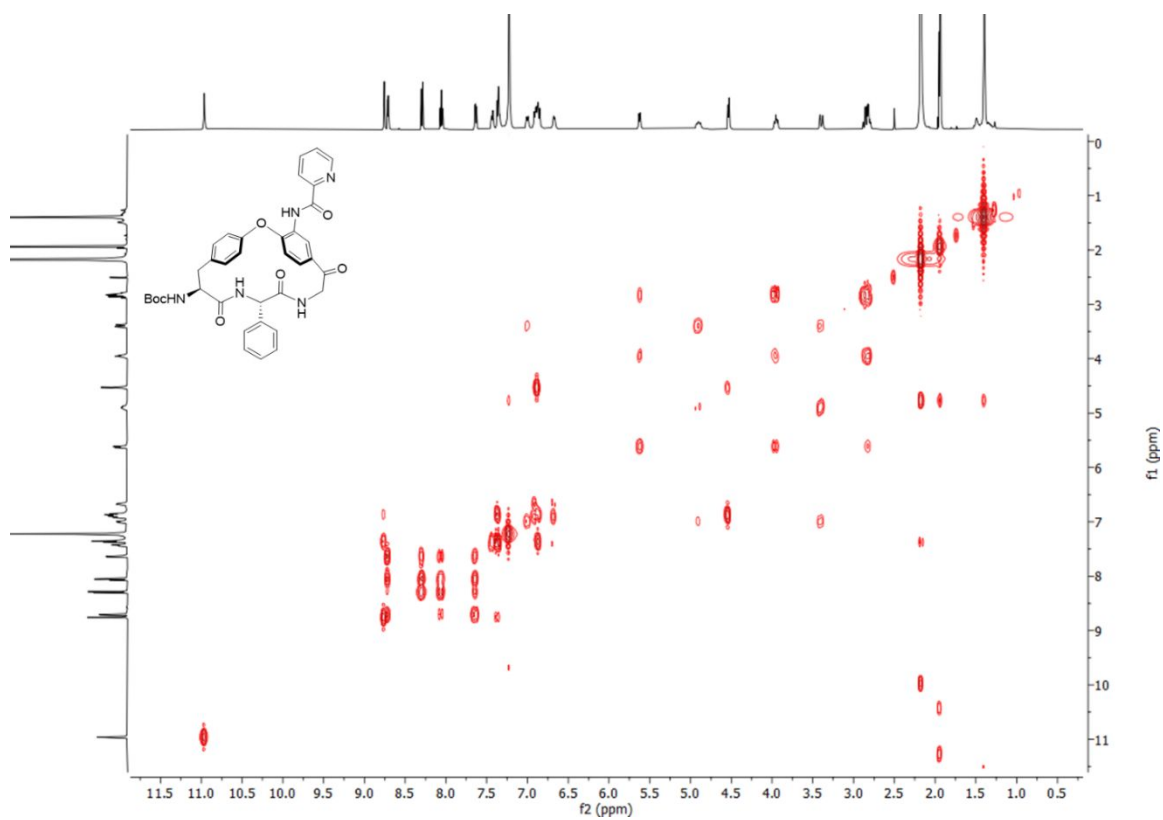

### Compound 9: HSQC NMR (CD<sub>3</sub>CN)

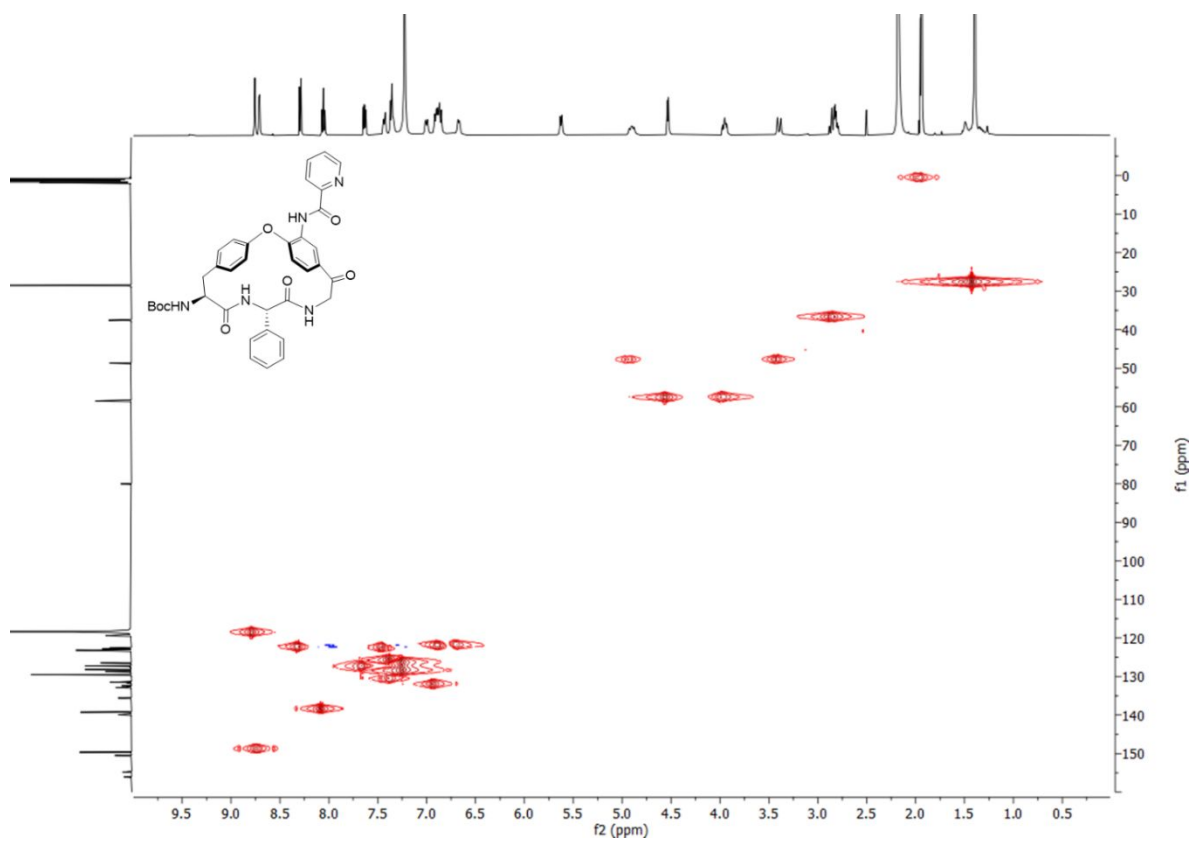

### Compound 9: HMBC NMR (CD<sub>3</sub>CN)

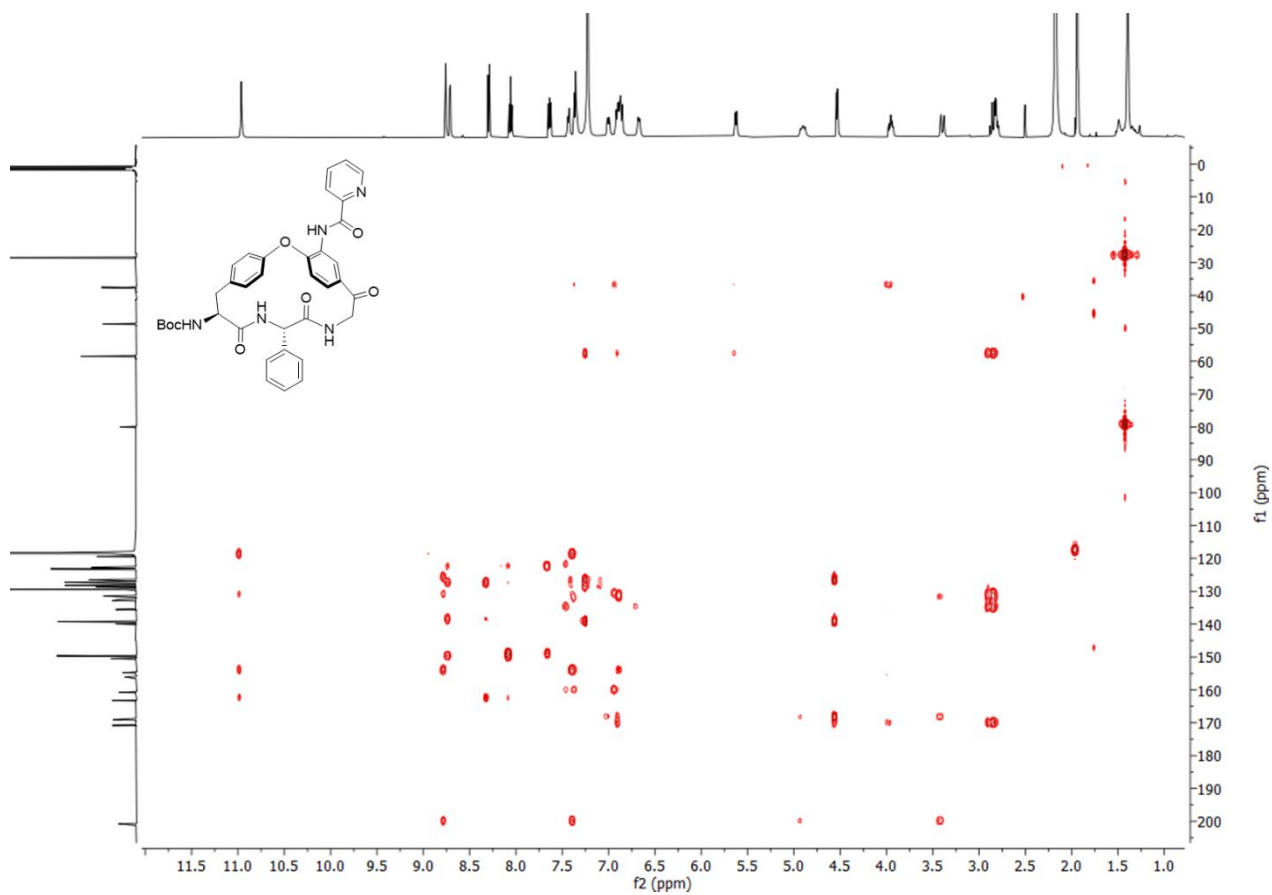



### Compound 10: COSY NMR (CD<sub>3</sub>CN)

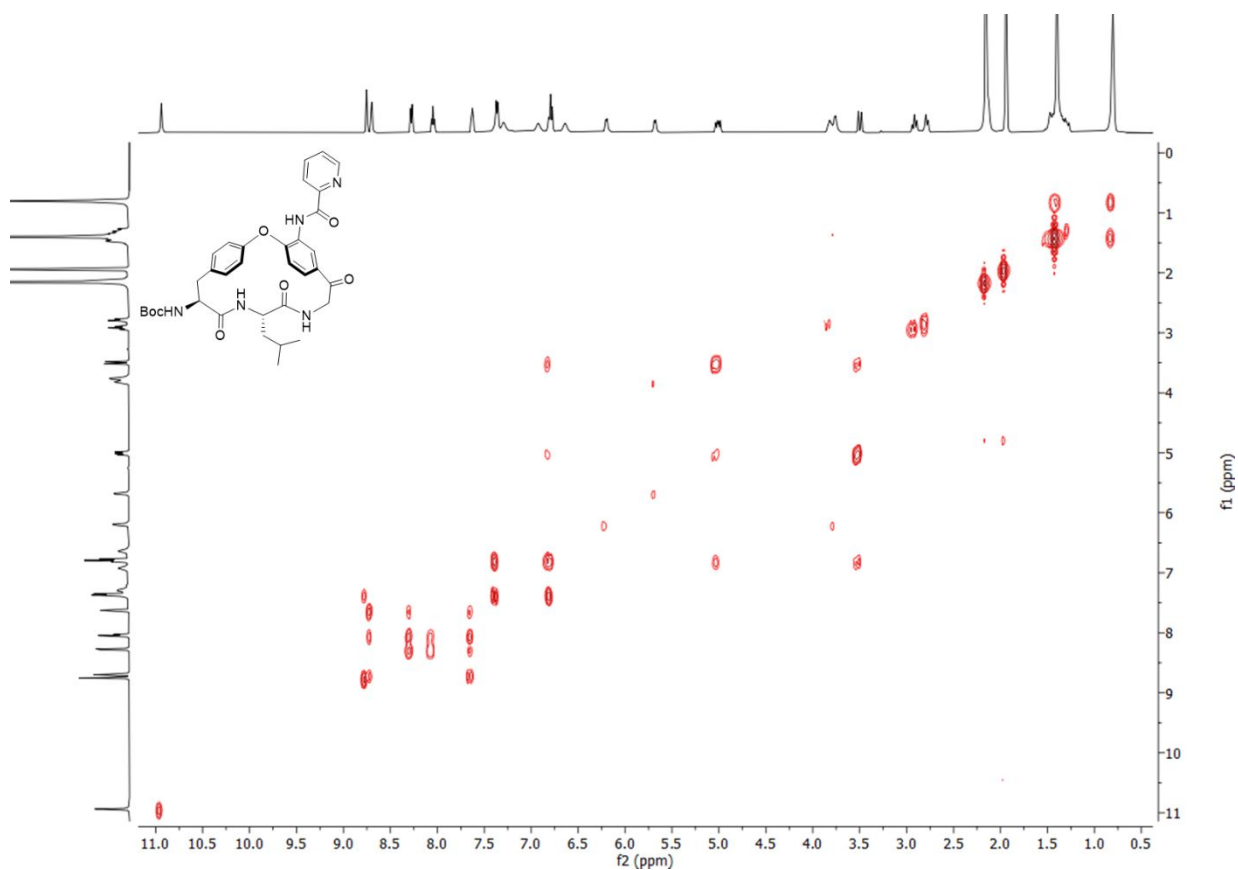

### Compound 10: HSQC NMR (CD<sub>3</sub>CN)

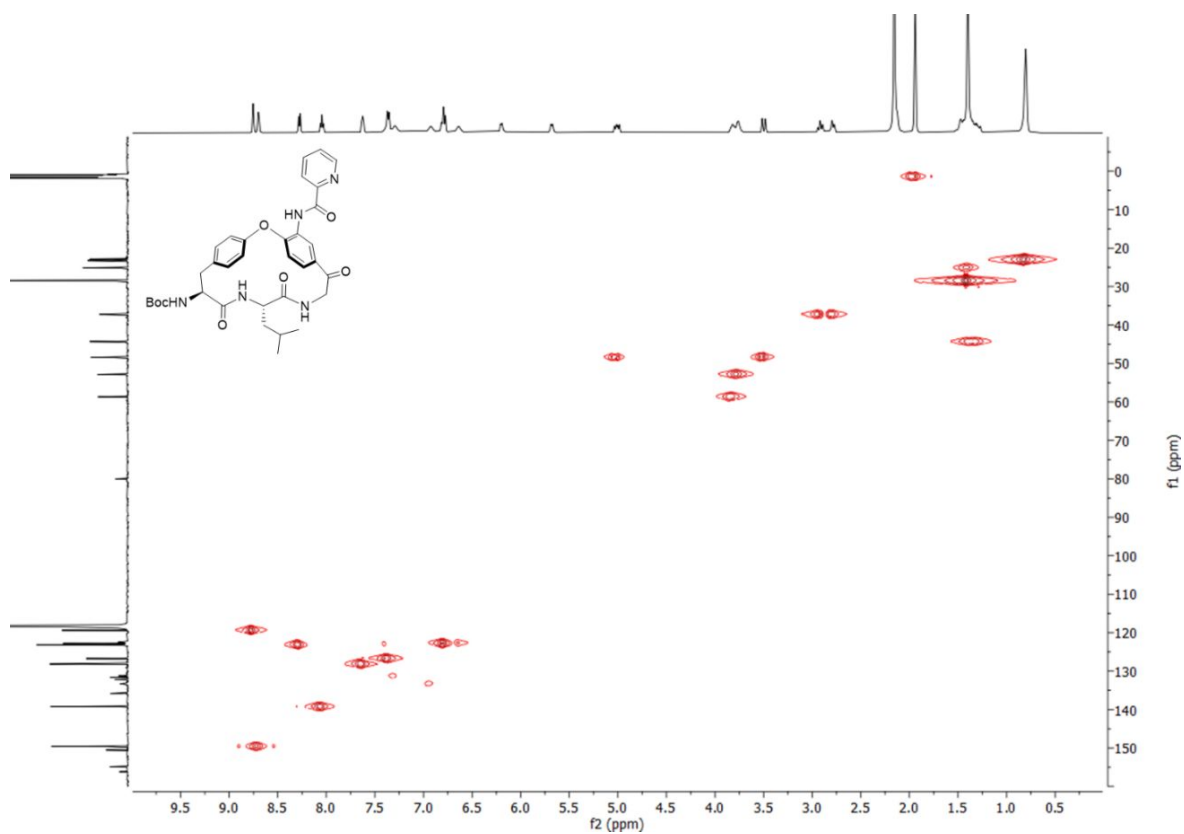

**Compound 10: HMBC NMR (CD<sub>3</sub>CN)**

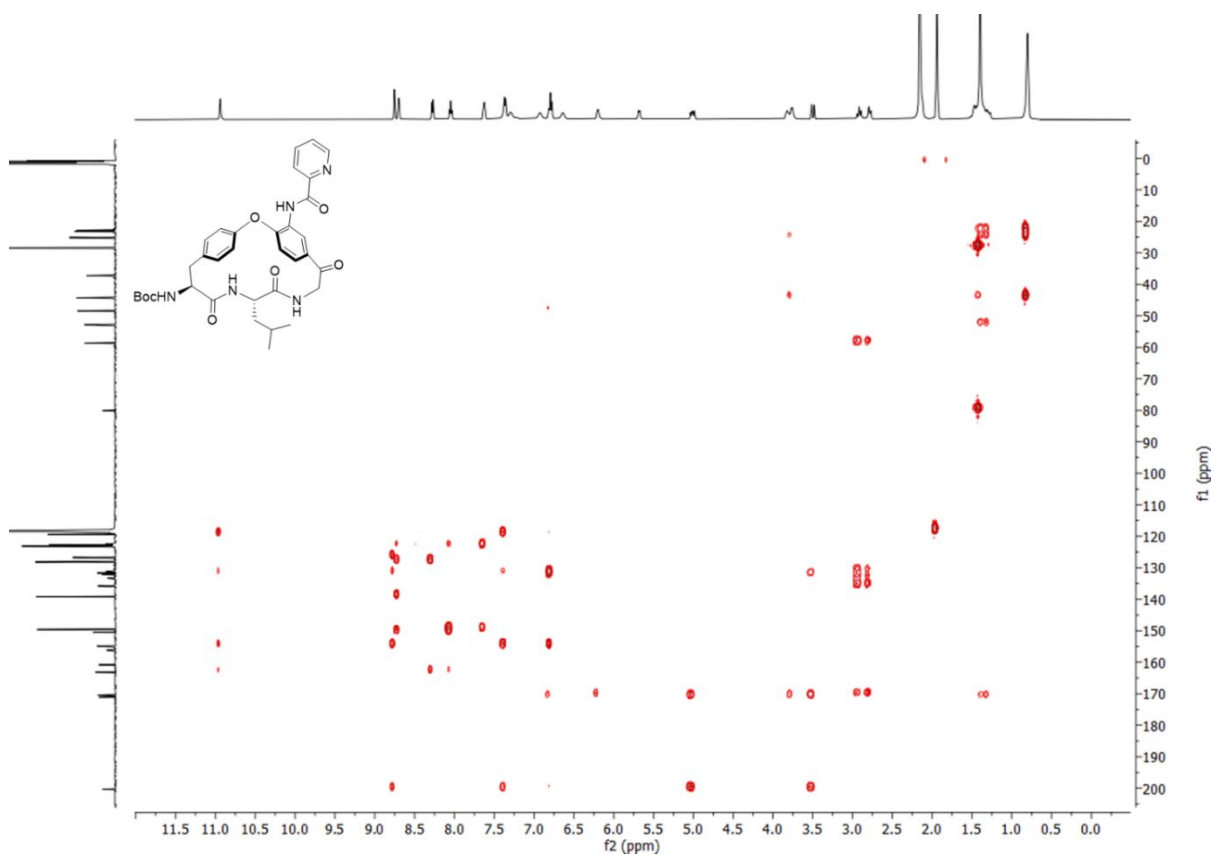

**Compound 11: <sup>1</sup>H NMR (CDCl<sub>3</sub>, 400 MHz)**

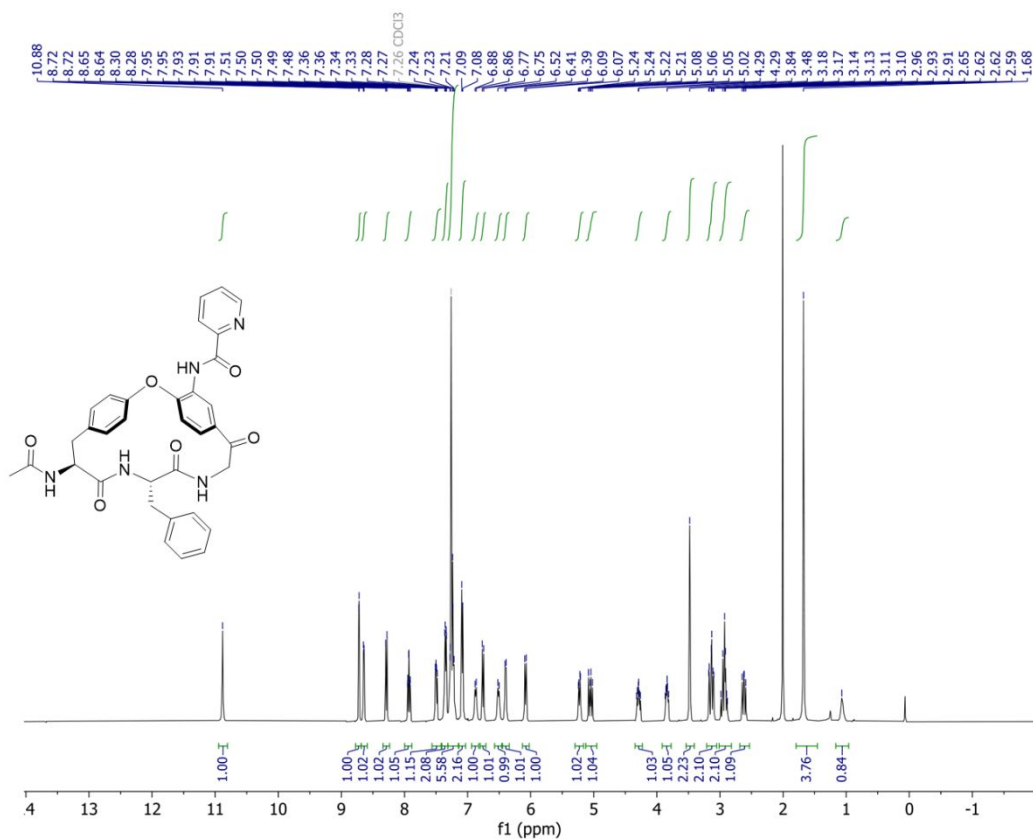



### Compound 11: $^{13}\text{C}$ NMR ( $\text{CDCl}_3$ , 100 MHz)

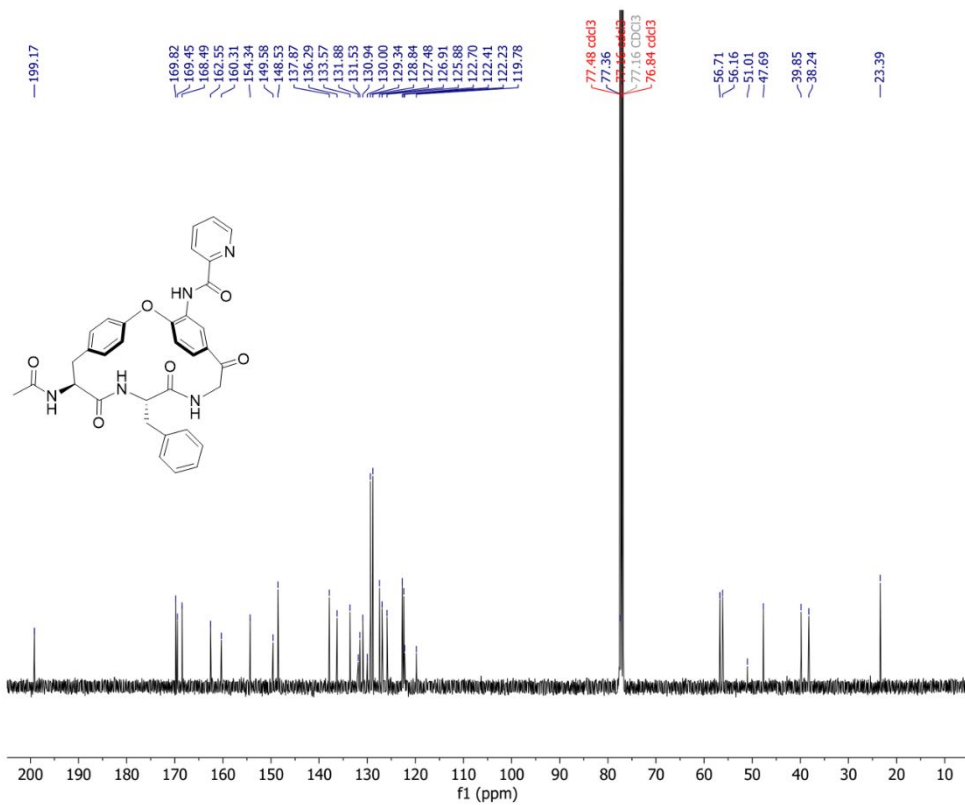

### Compound 11: COSY NMR ( $\text{CDCl}_3$ )

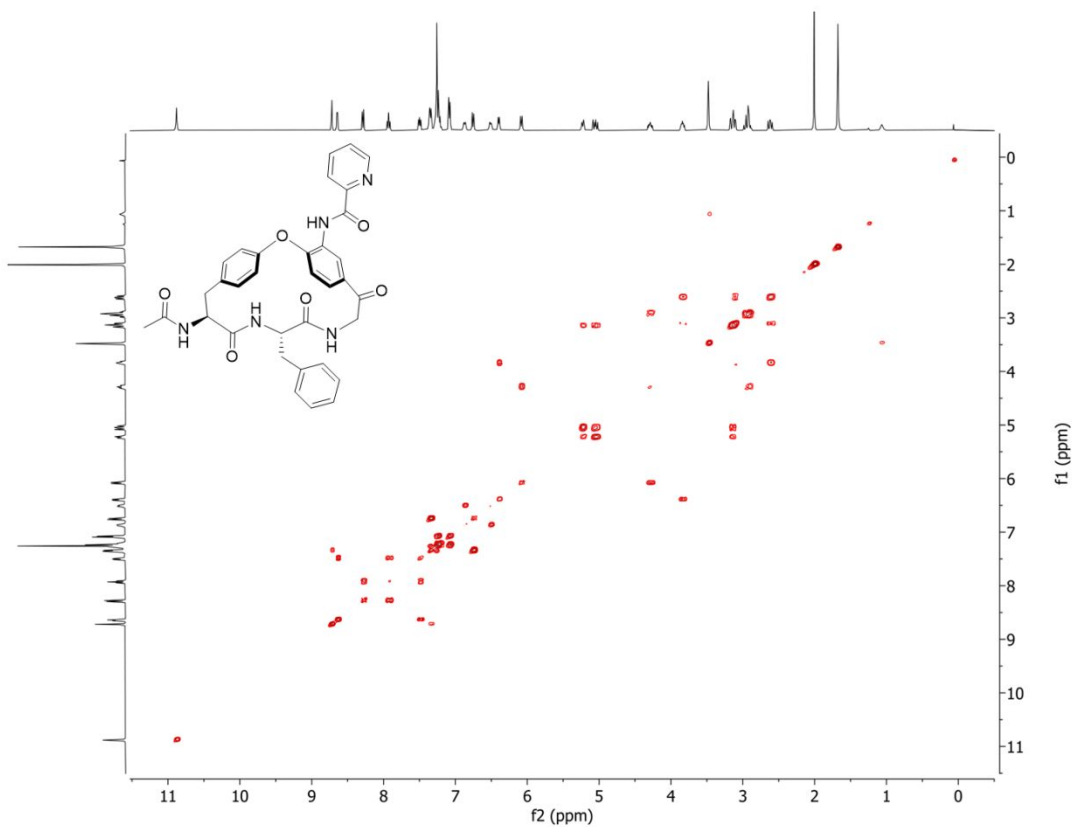

### Compound 11: HSQC (CDCl<sub>3</sub>)

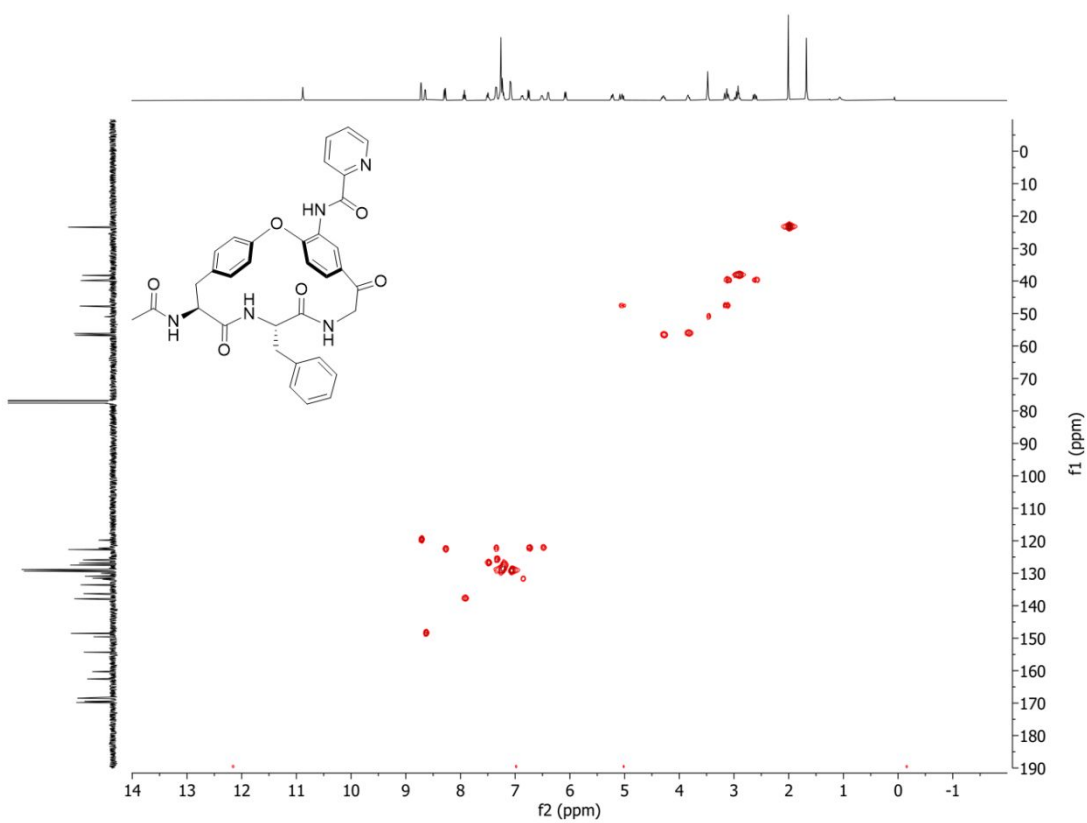

### Compound 11: HMBC NMR (CDCl<sub>3</sub>)

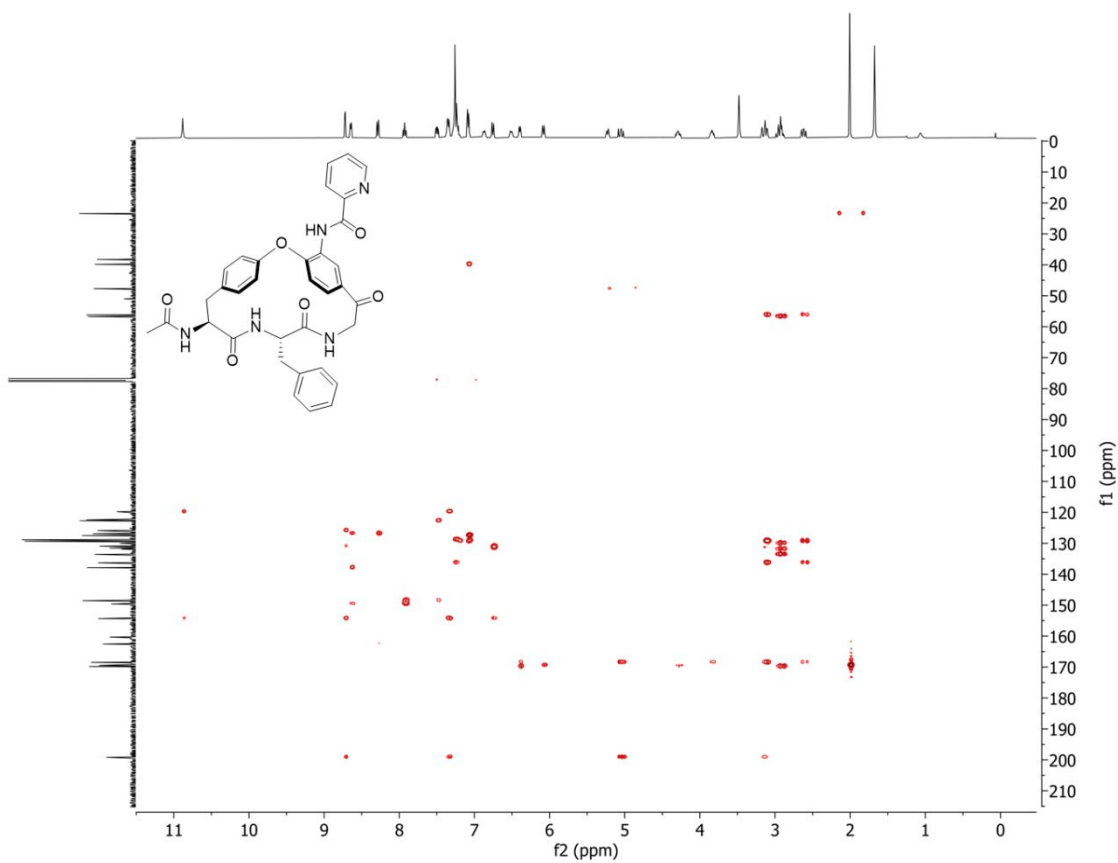

**Compound 12: <sup>1</sup>H NMR (CD<sub>3</sub>CN, 400 MHz)**

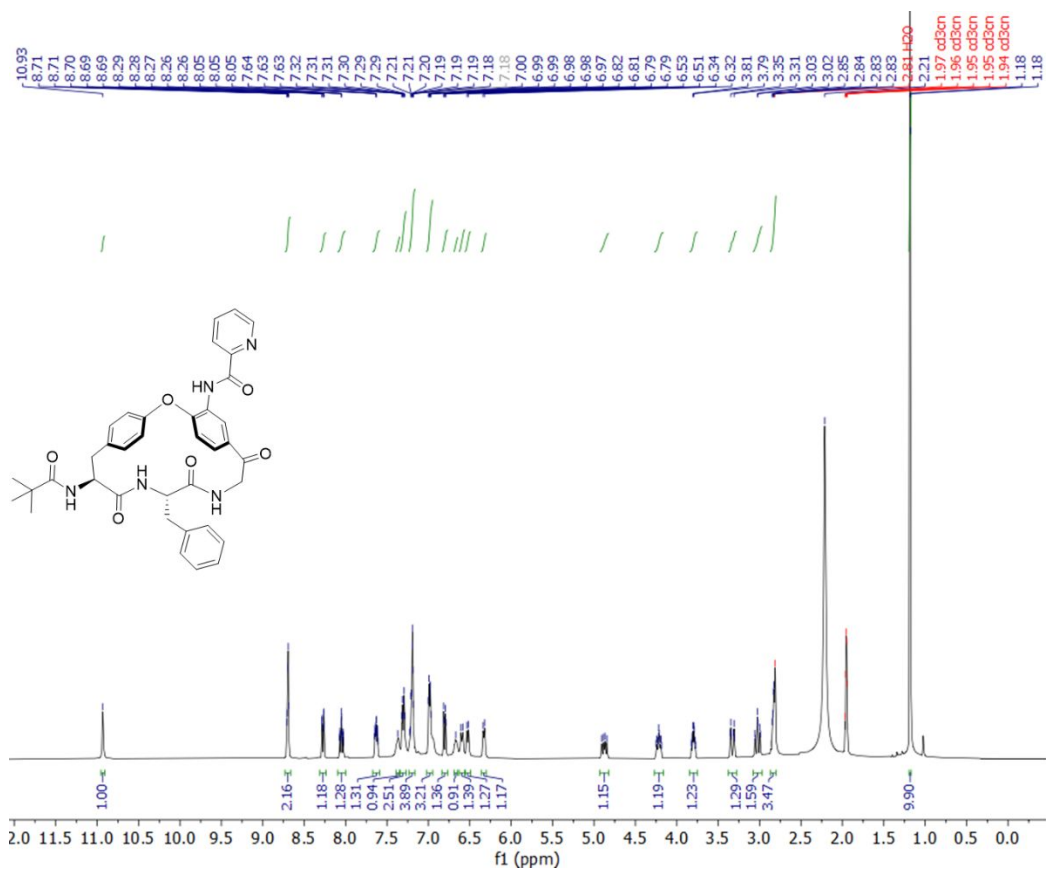

**Compound 12: <sup>13</sup>C NMR (CD<sub>3</sub>CN, 500 MHz)**

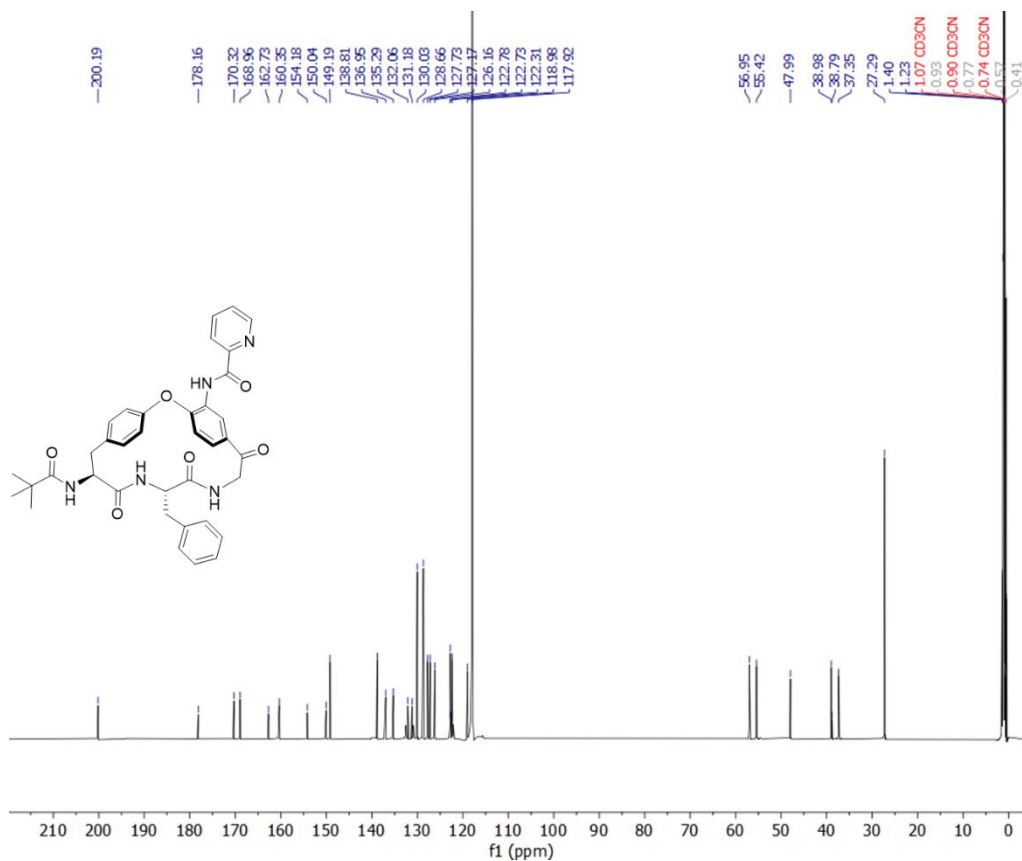

**Compound 12: COSY (CD<sub>3</sub>CN)**

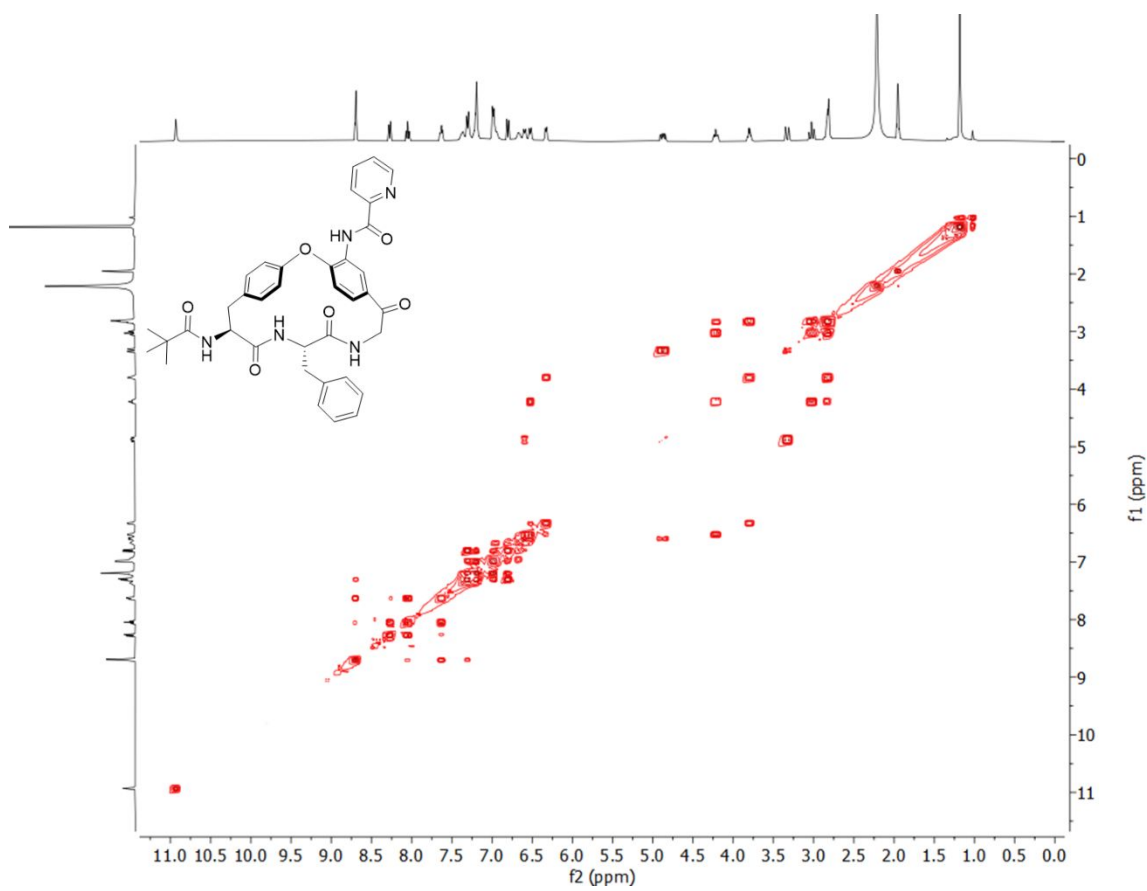

**Compound 12: HSQC (CD<sub>3</sub>CN)**

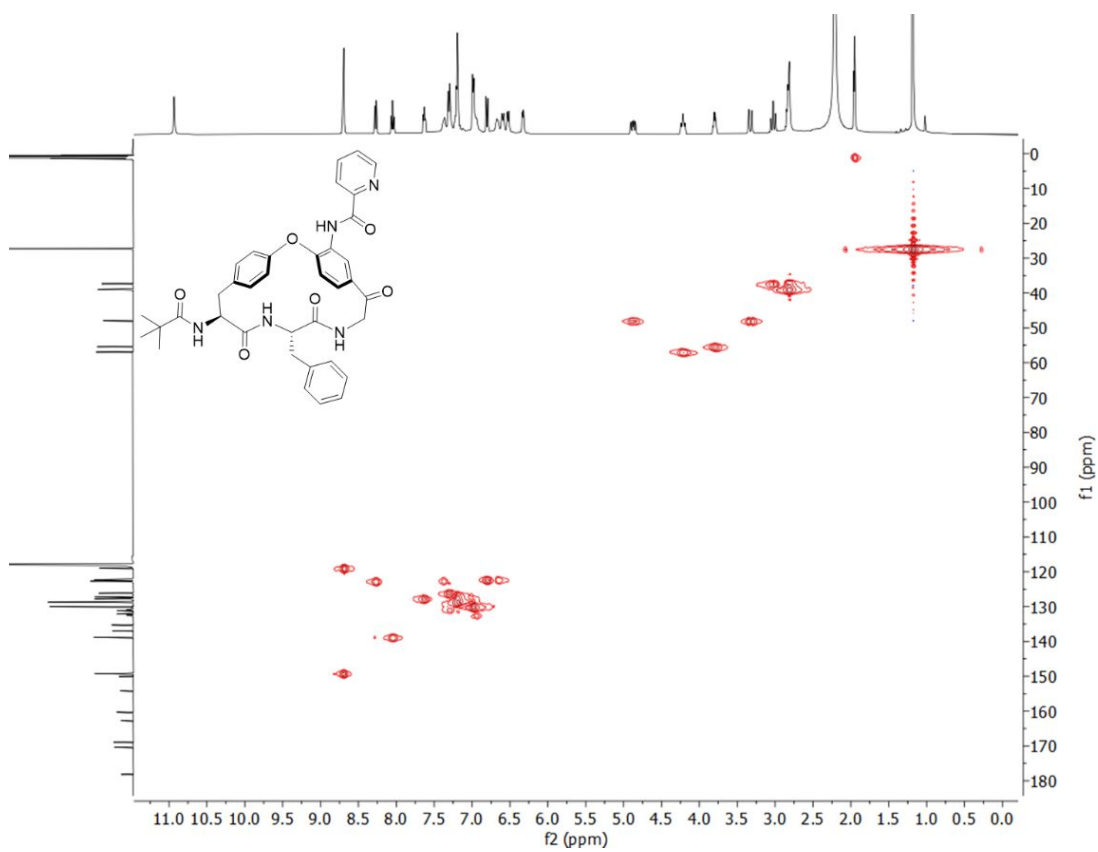

**Compound 12: HMBC (CD<sub>3</sub>CN)**

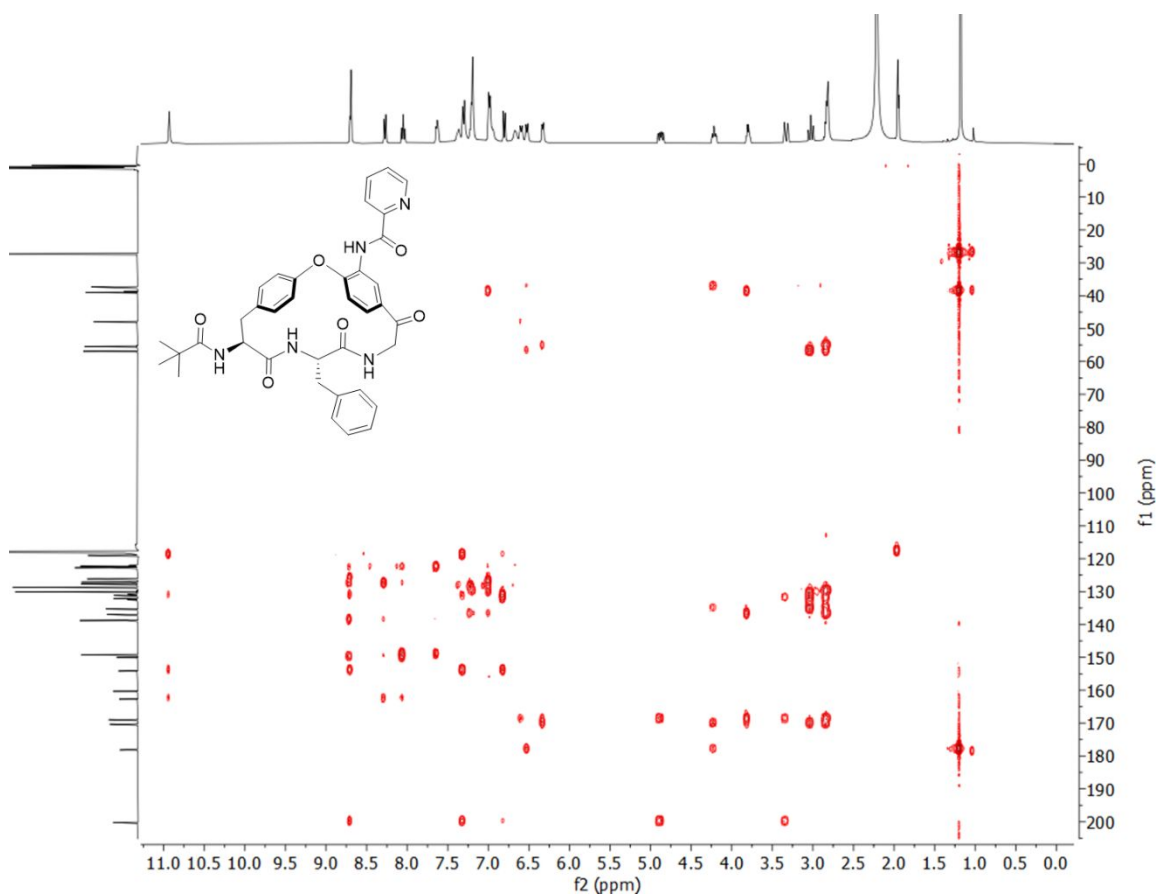

**Compound 15: <sup>1</sup>H NMR (CD<sub>3</sub>CN, 400 MHz)**

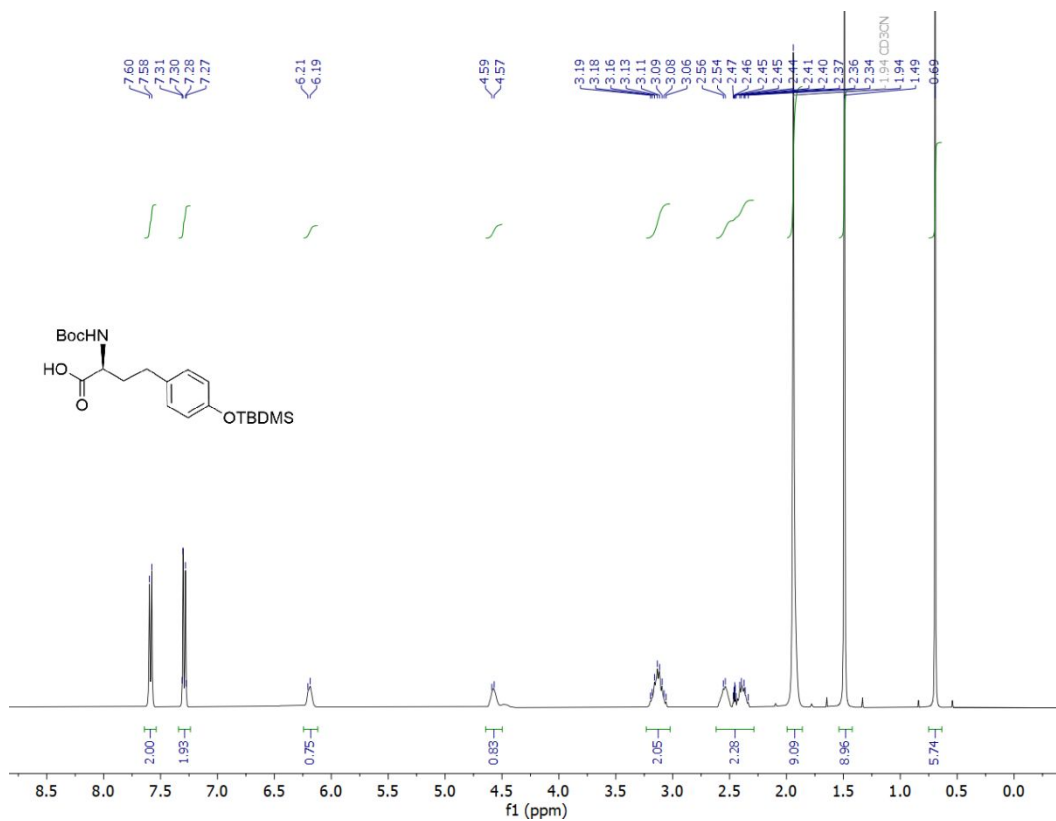

**Compound 15:  $^{13}\text{C}$  NMR ( $\text{CD}_3\text{CN}$ , 100 MHz)**

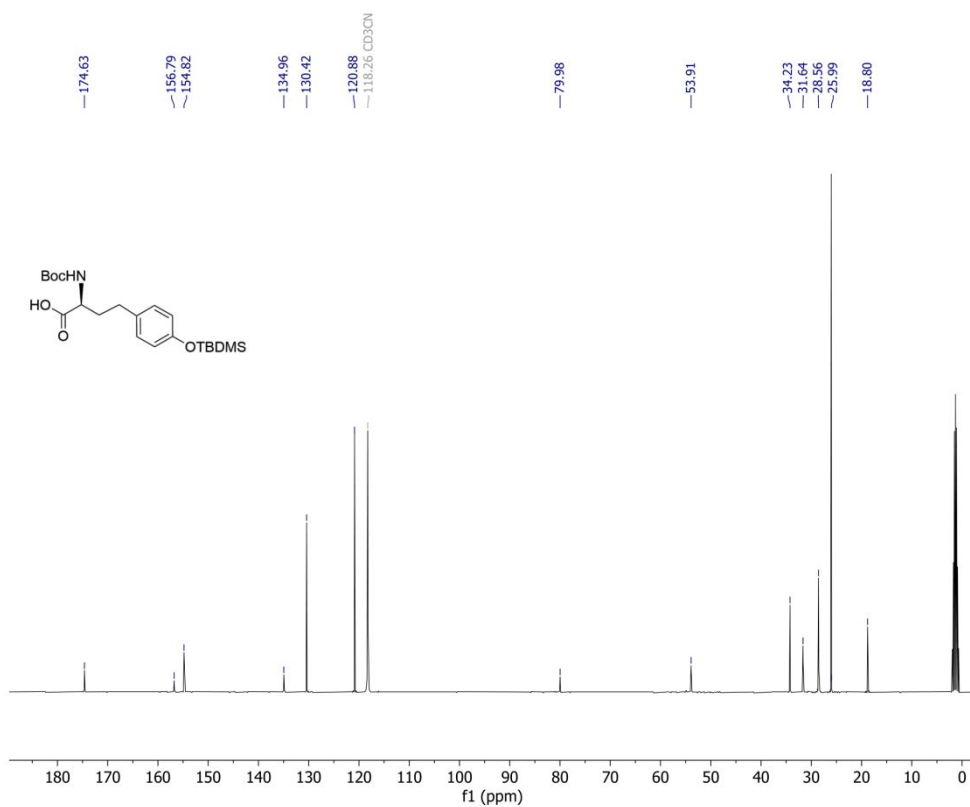

**Compound 16:  $^1\text{H}$  NMR ( $\text{CD}_3\text{CN}$ , 400 MHz)**

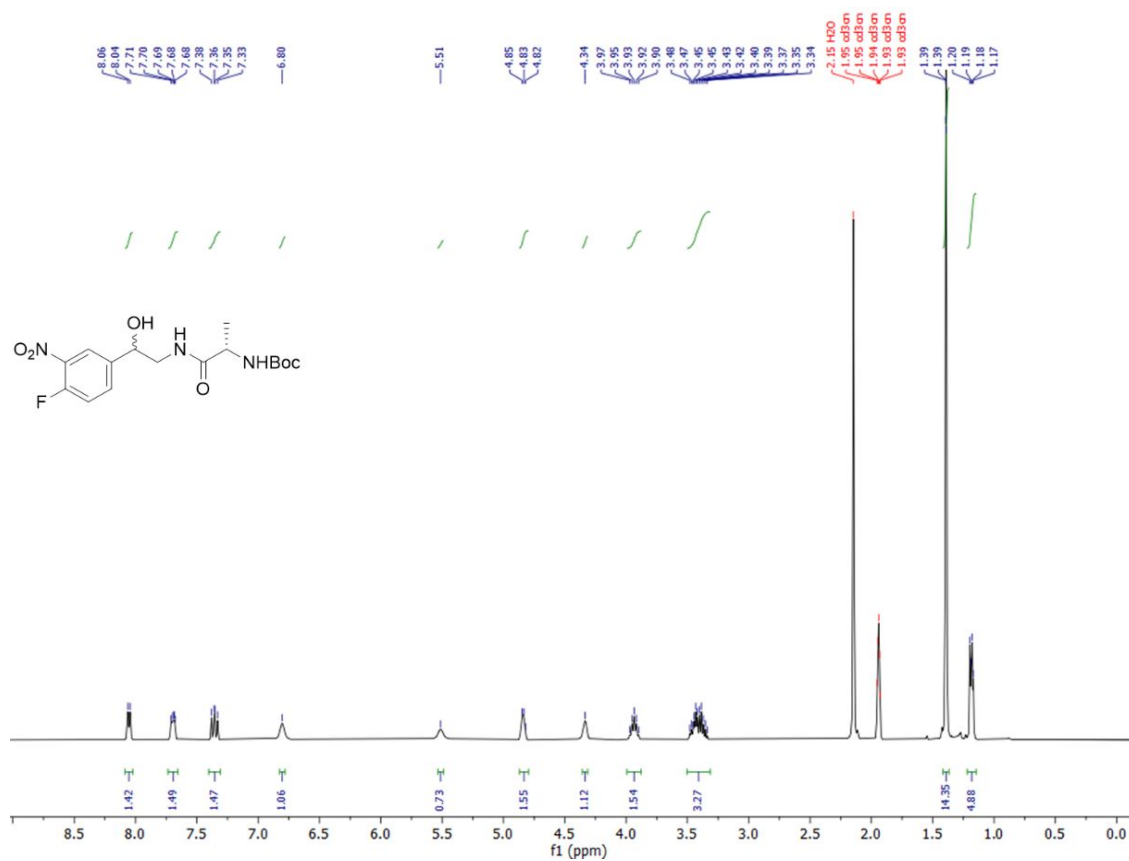

**Compound 16:  $^{13}\text{C}$  NMR ( $\text{CD}_3\text{CN}$ , 100 MHz)**

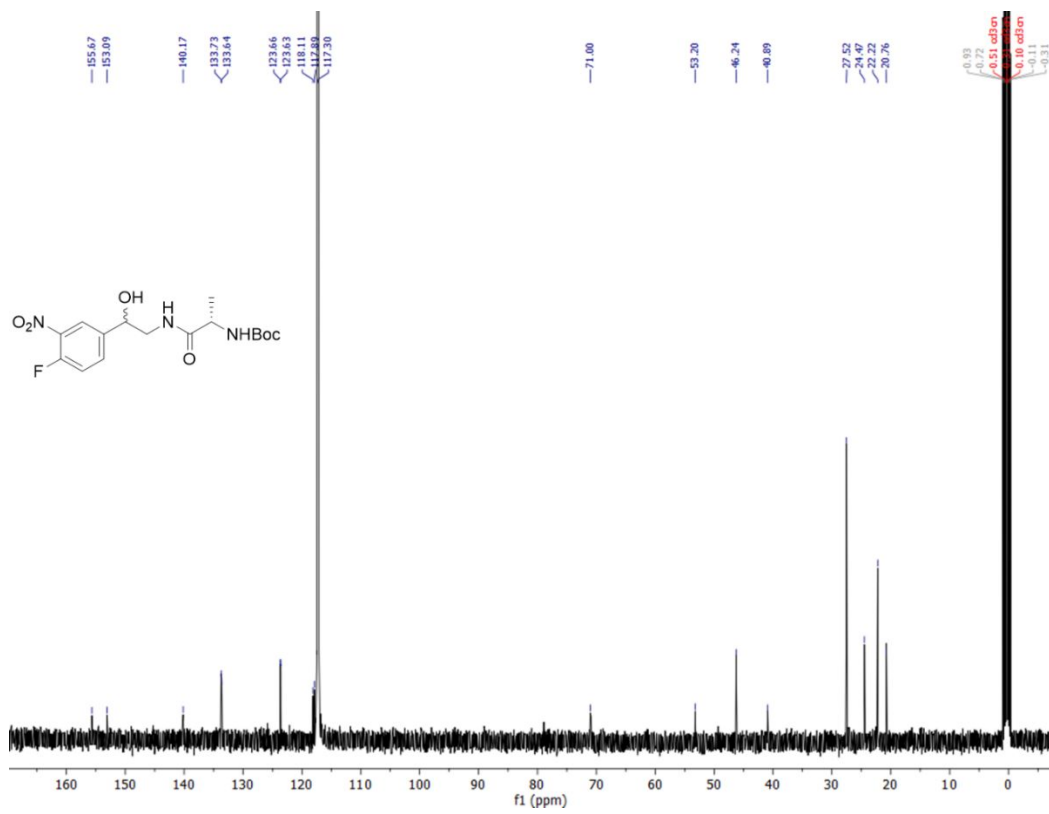

**Compound 17:  $^1\text{H}$  NMR ( $\text{CD}_3\text{CN}$ , 400 MHz)**

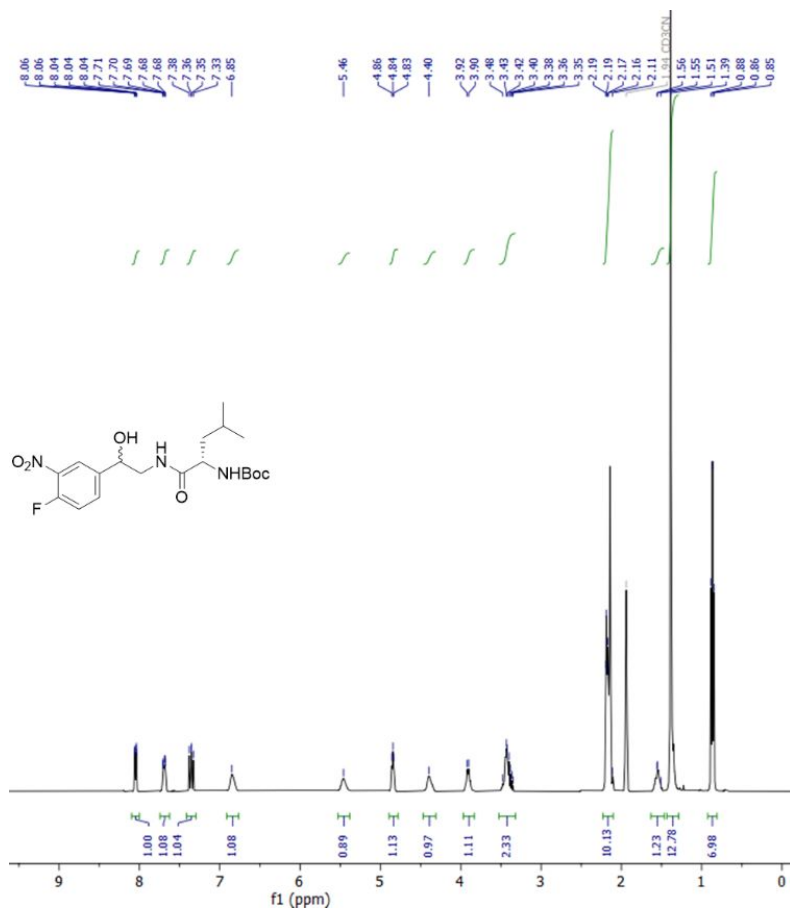

**Compound 17:  $^{13}\text{C}$  NMR ( $\text{CD}_3\text{CN}$ , 100 MHz)**

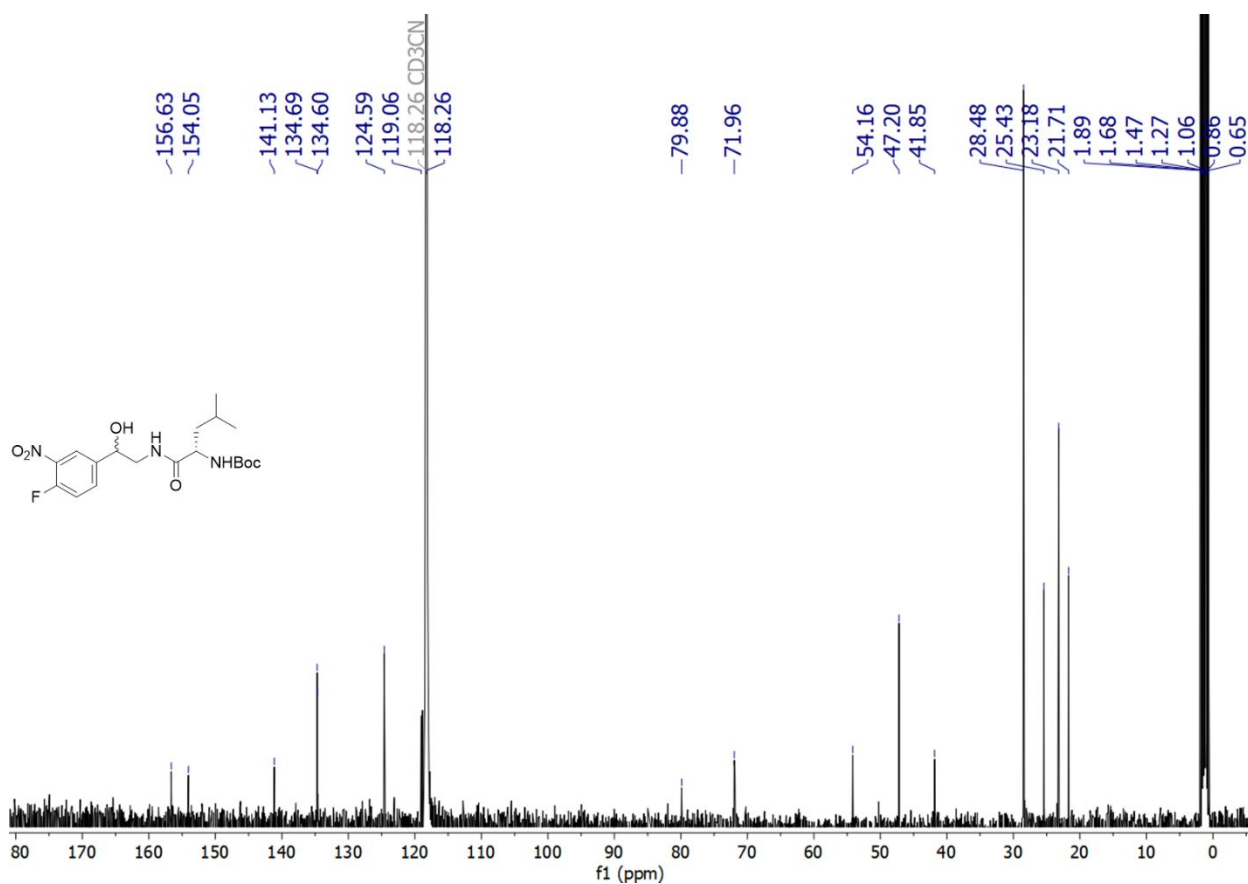

**Compound 19:  $^1\text{H}$  NMR ( $\text{DMSO-d}_6$ , 500 MHz)**

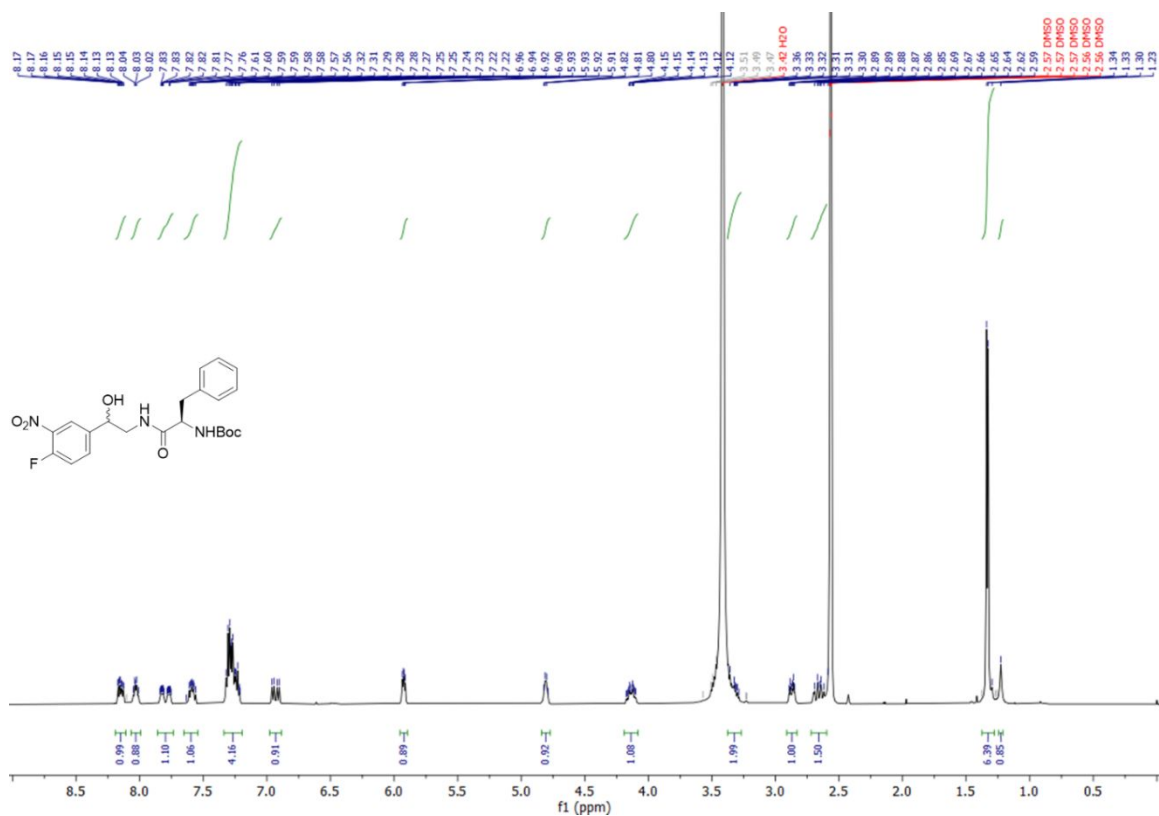





**Compound 24:  $^{13}\text{C}$  NMR (DMSO- $d_6$ , 125 MHz)**

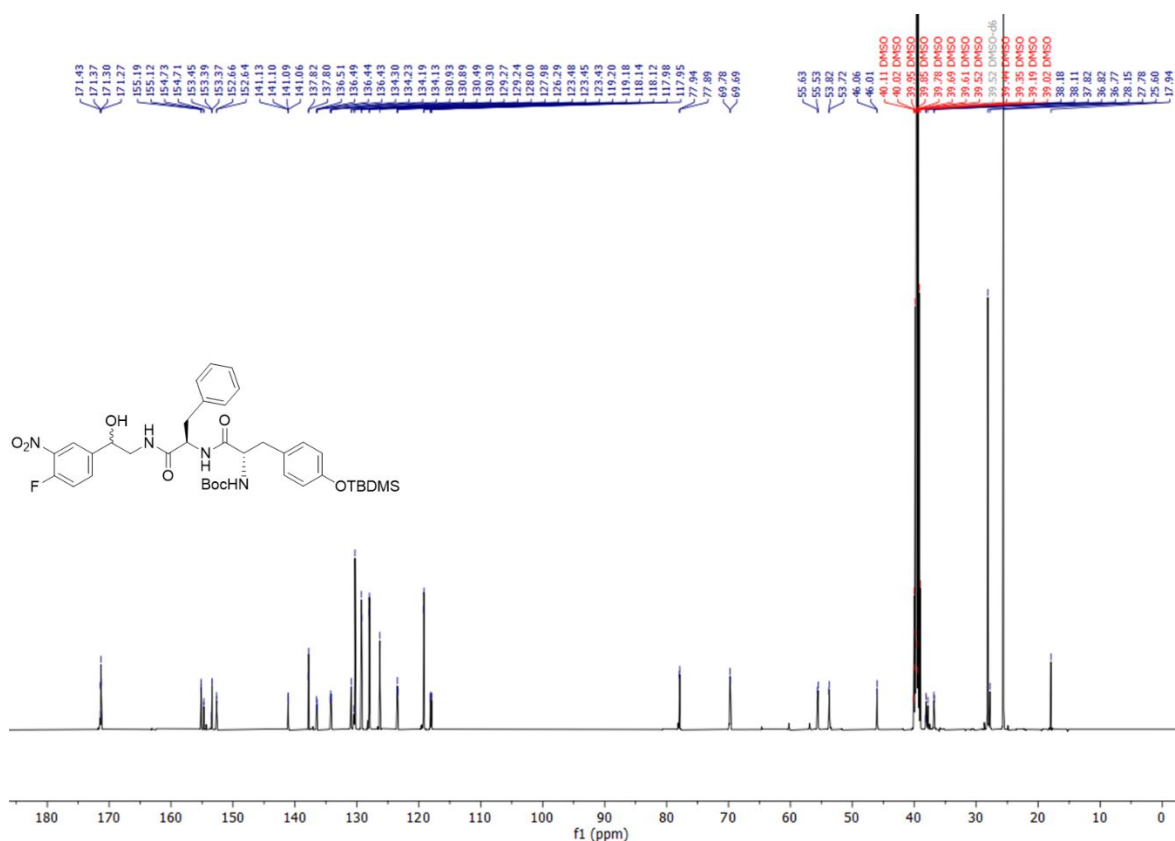

**Compound 26:  $^1\text{H}$  NMR (DMSO- $d_6$ , 400 Hz)**

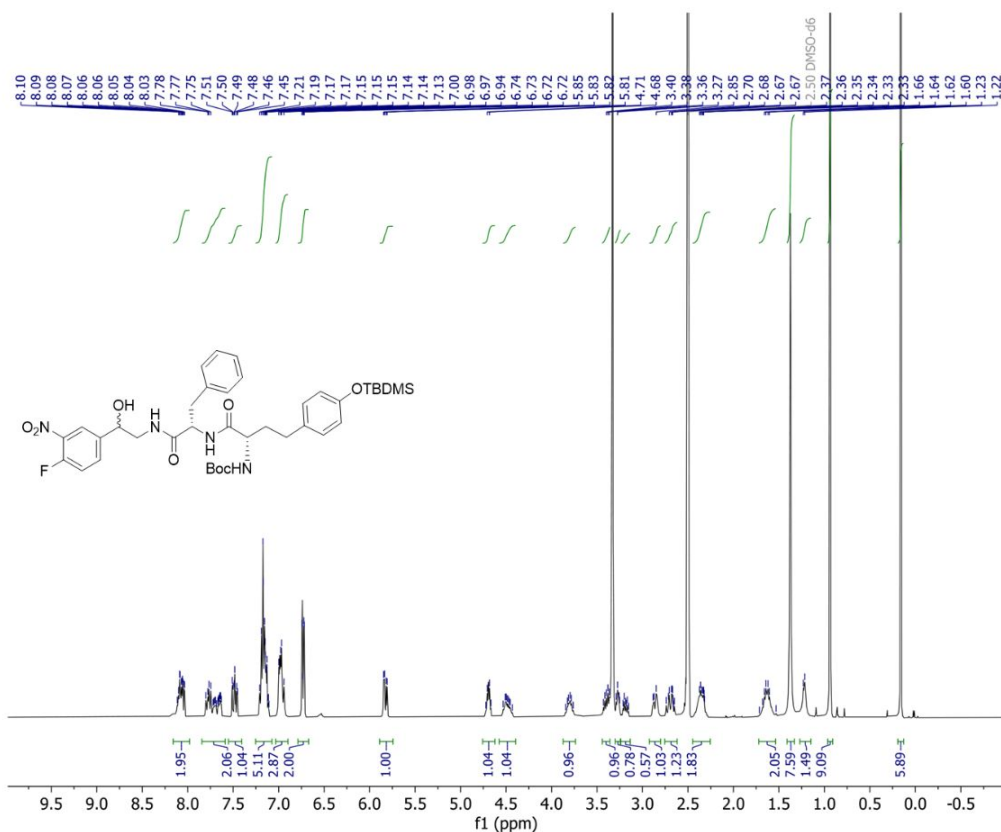

**Compound 26:  $^{13}\text{C}$  NMR (DMSO- $d_6$ , 100 MHz)**

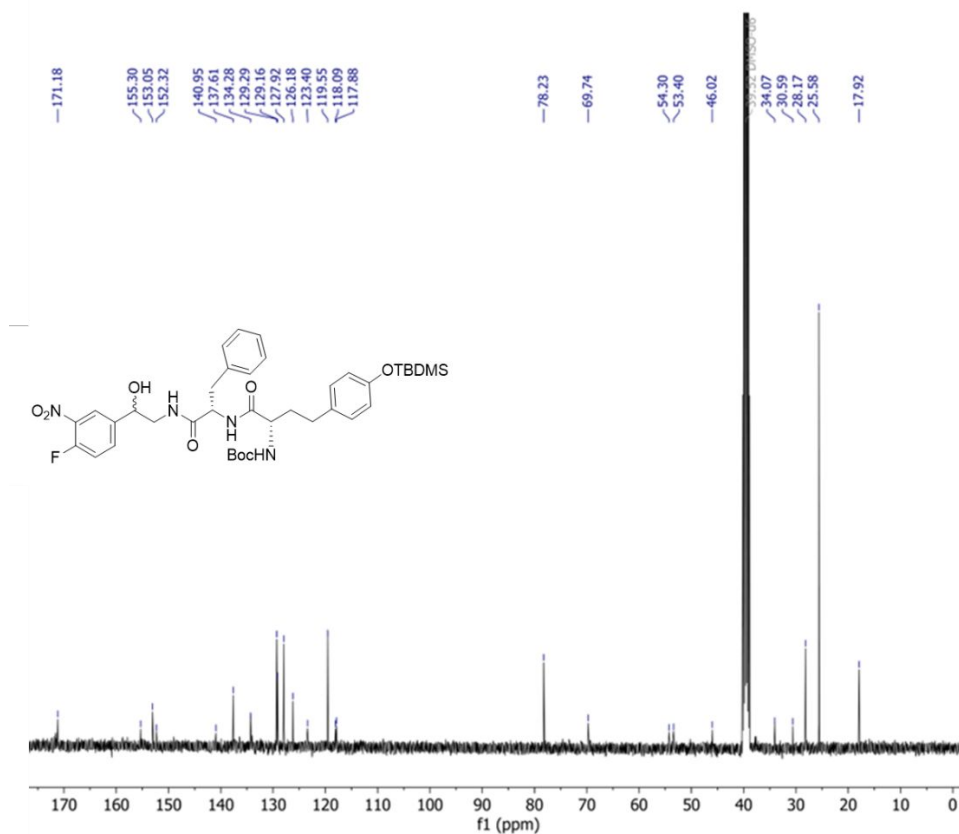

**Compound 27:  $^1\text{H}$  NMR (DMSO- $d_6$ , 400 MHz)**

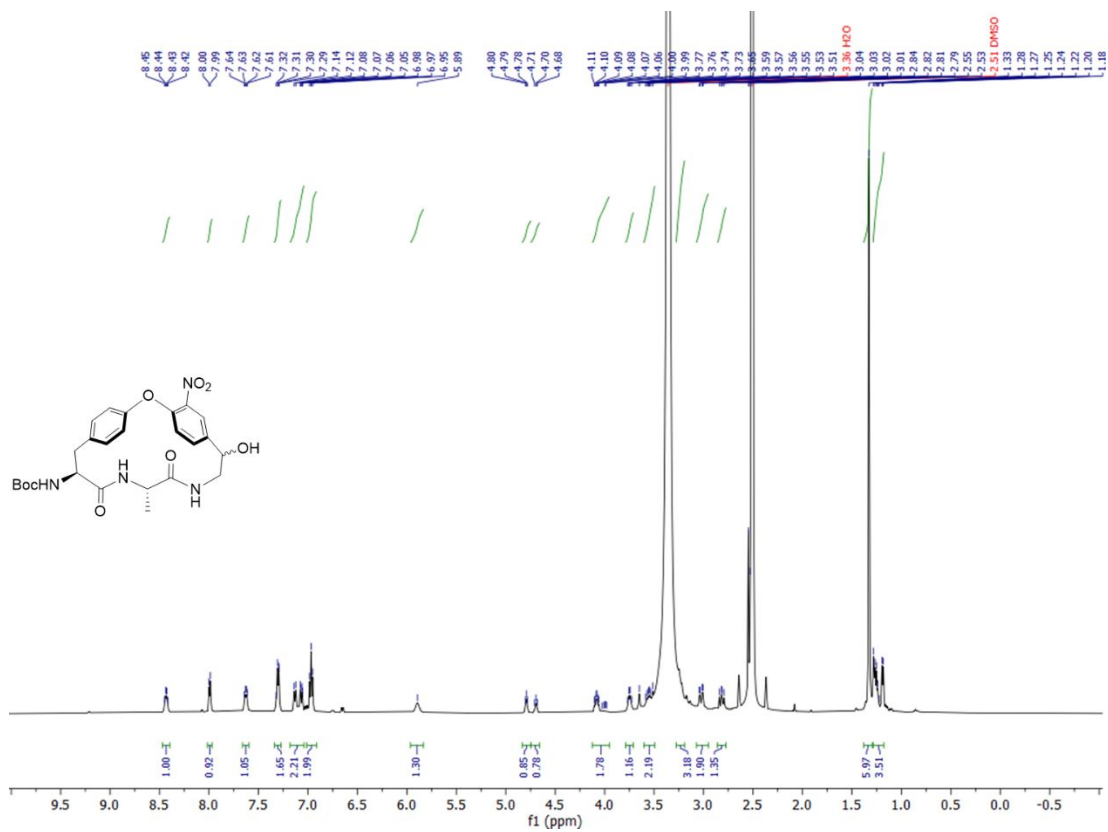

**Compound 27:  $^{13}\text{C}$  NMR (DMSO- $d_6$ , 100 MHz)**

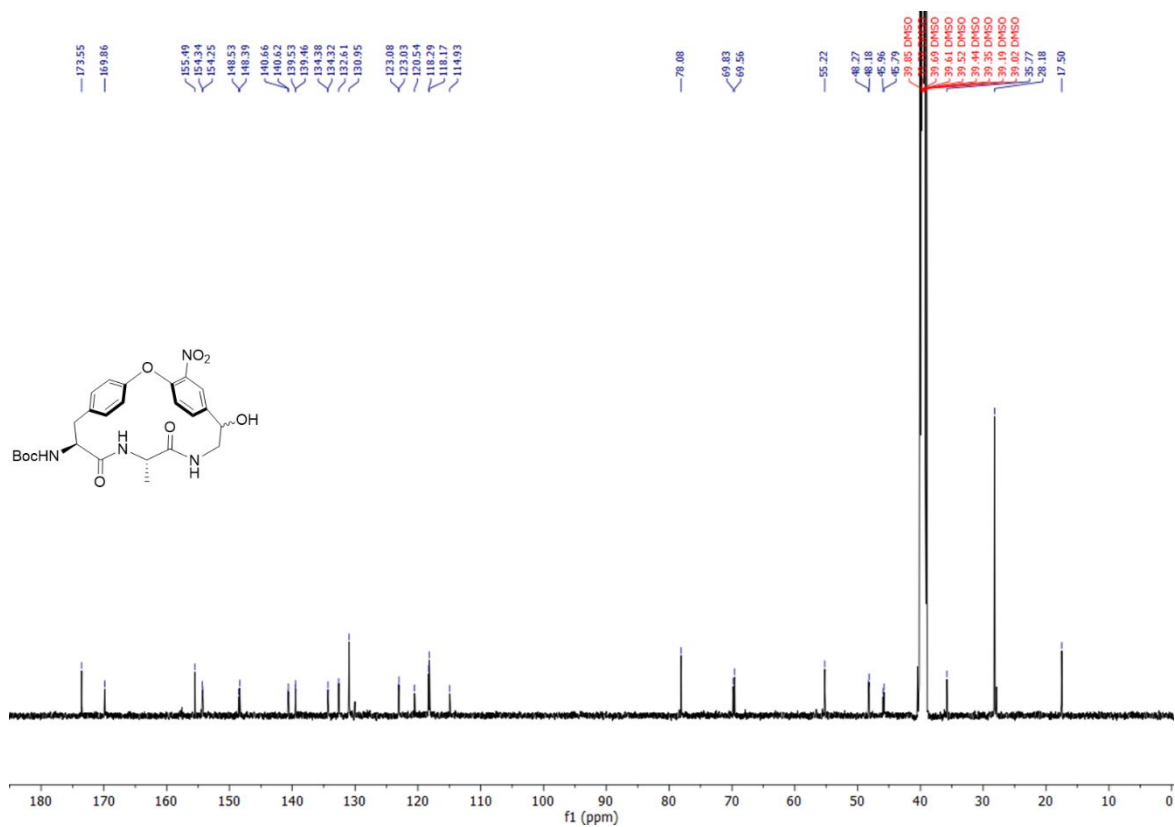

**Compound 28:  $^1\text{H}$  NMR (DMSO- $d_6$ , 500 MHz)**

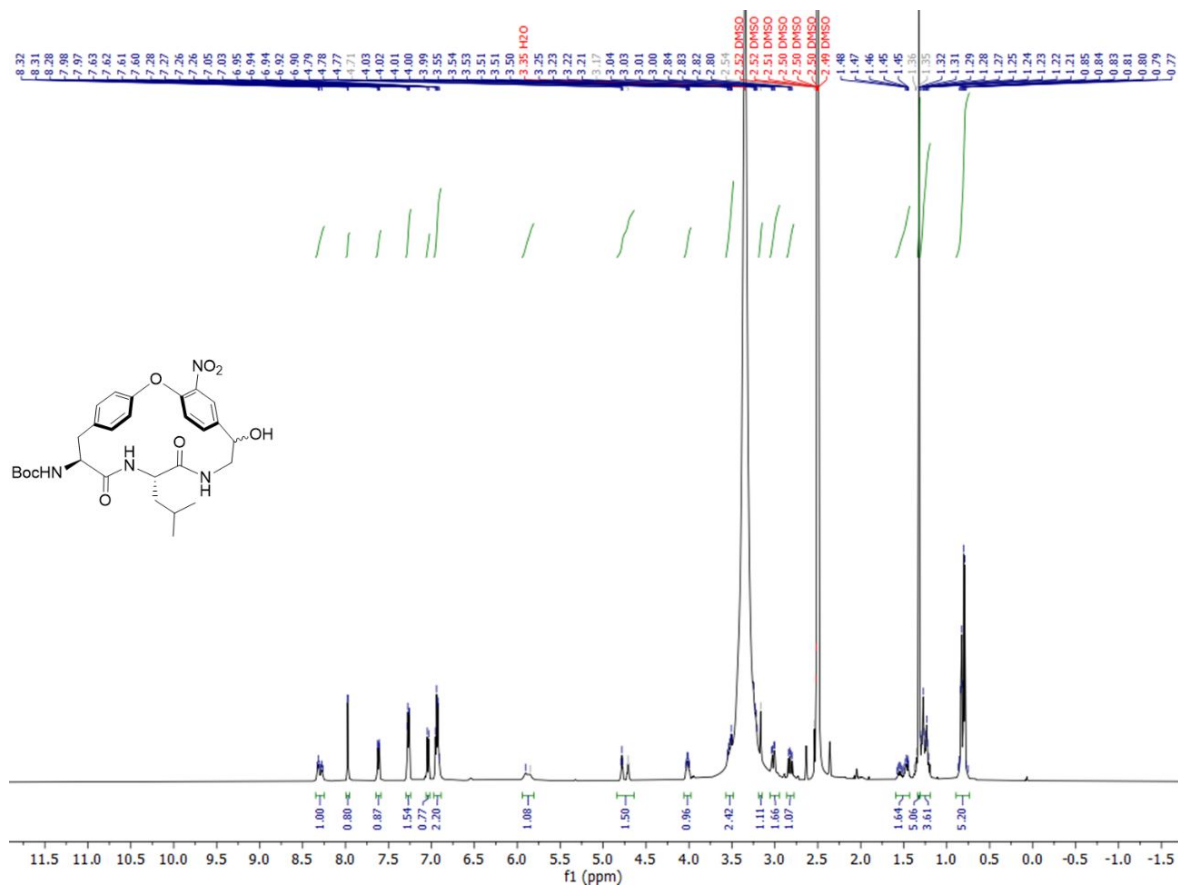



**Compound 30:  $^{13}\text{C}$  NMR (DMSO- $d_6$ , 125 MHz)**

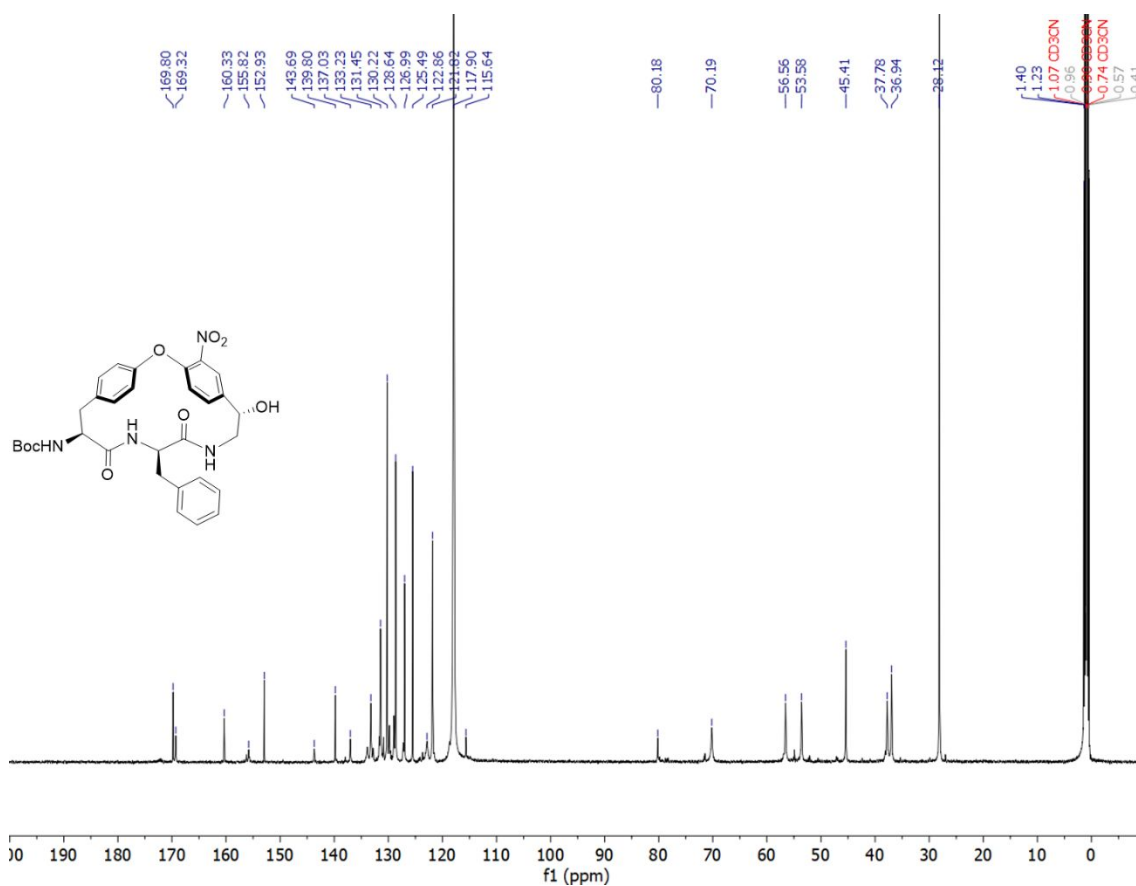

**Compound 32:  $^1\text{H}$  NMR (CD $_3$ CN, 500 MHz)**

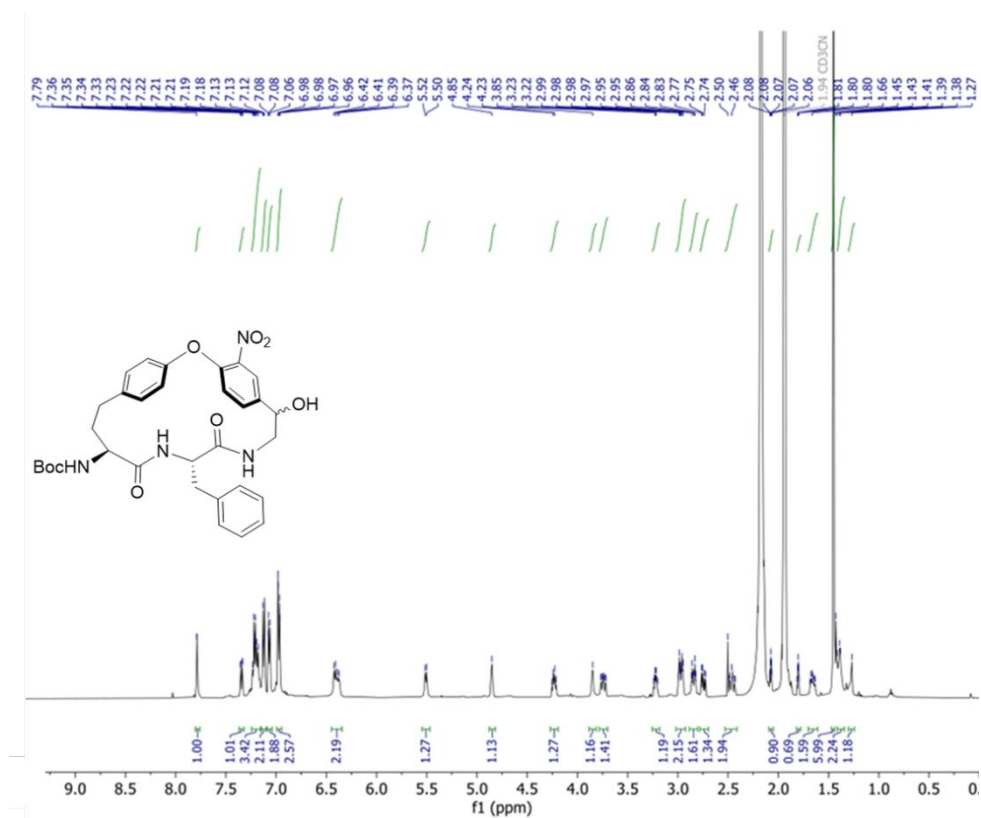

**Compound 32:  $^{13}\text{C}$  NMR ( $\text{CD}_3\text{CN}$ , 125 MHz)**

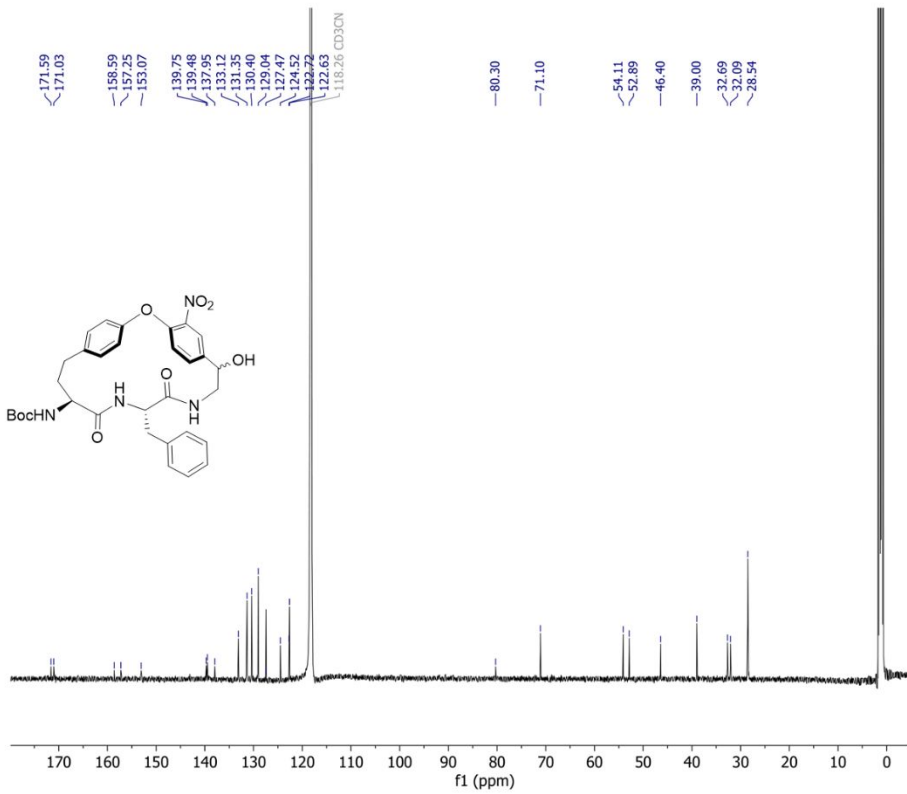

**Compound 34:  $^1\text{H}$  NMR ( $\text{DMSO-d}_6$ , 500 MHz)**

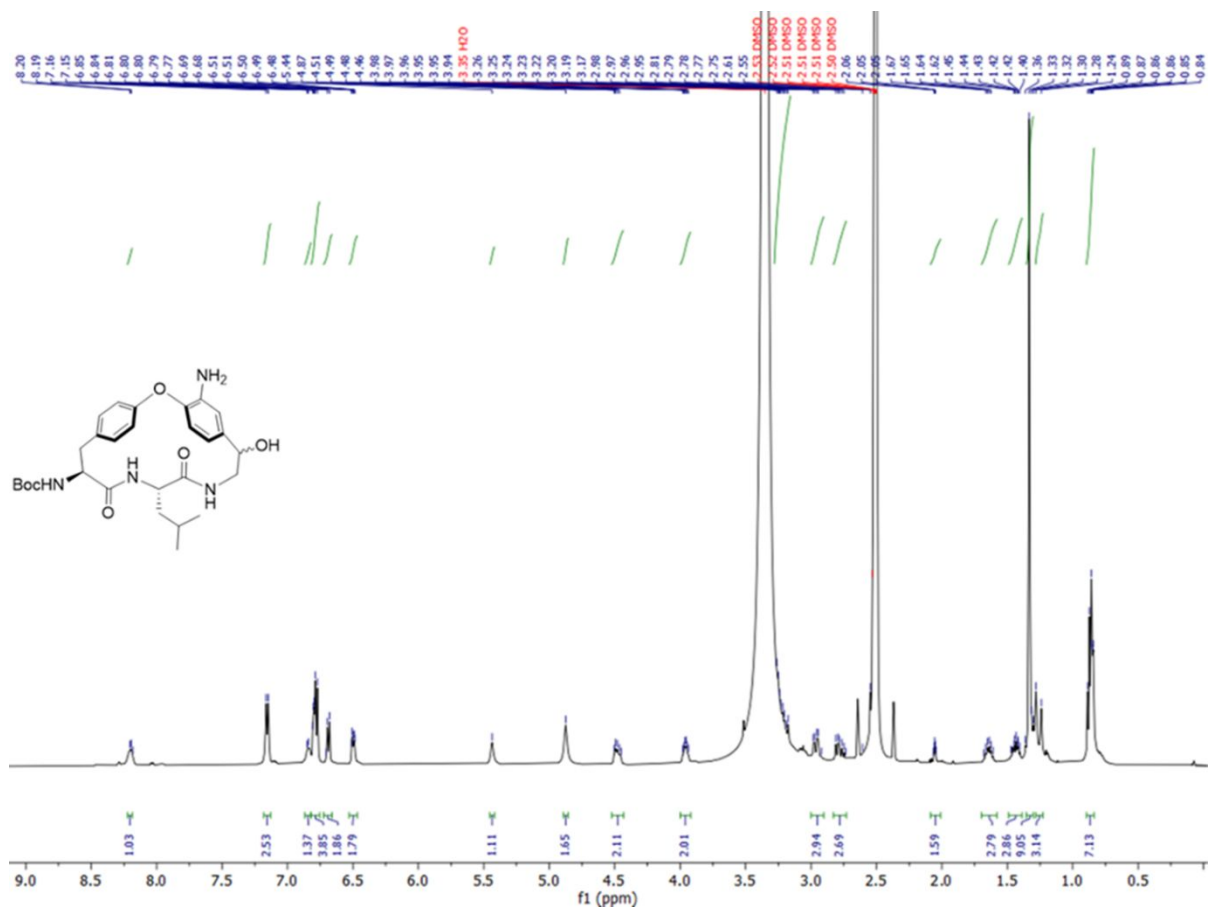





**Compound 35:  $^{13}\text{C}$  NMR (DMSO- $d_6$ , 500 MHz)**

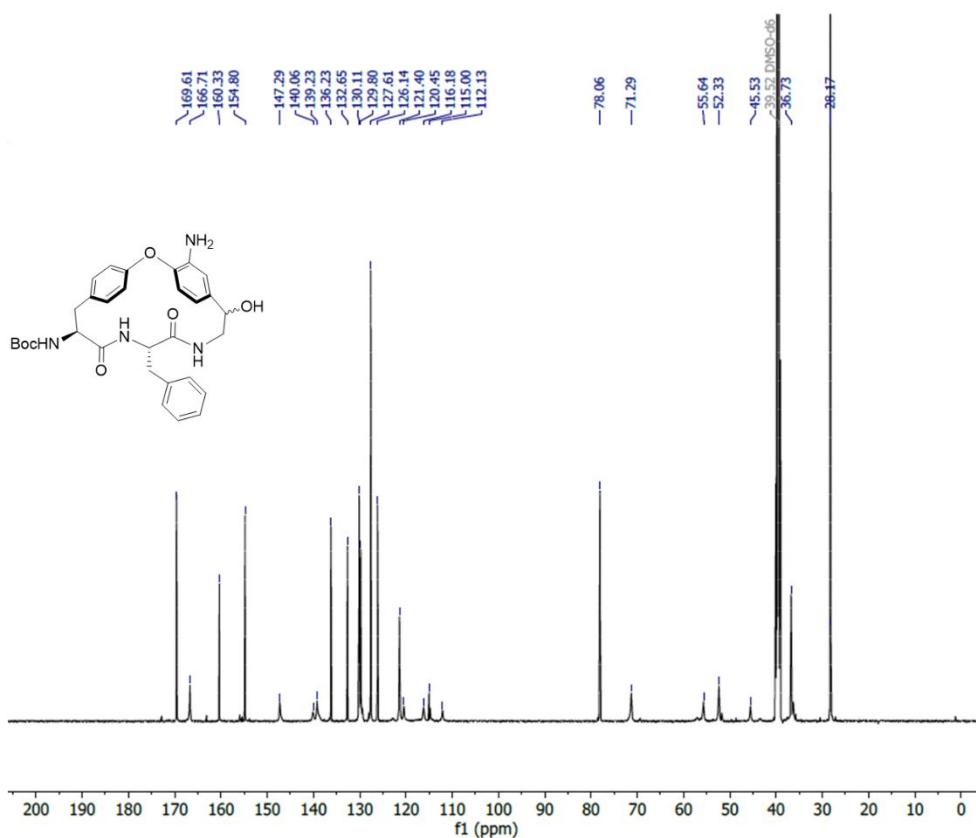

**Compound 41:  $^1\text{H}$  NMR ( $\text{CDCl}_3$ , 400 MHz)**

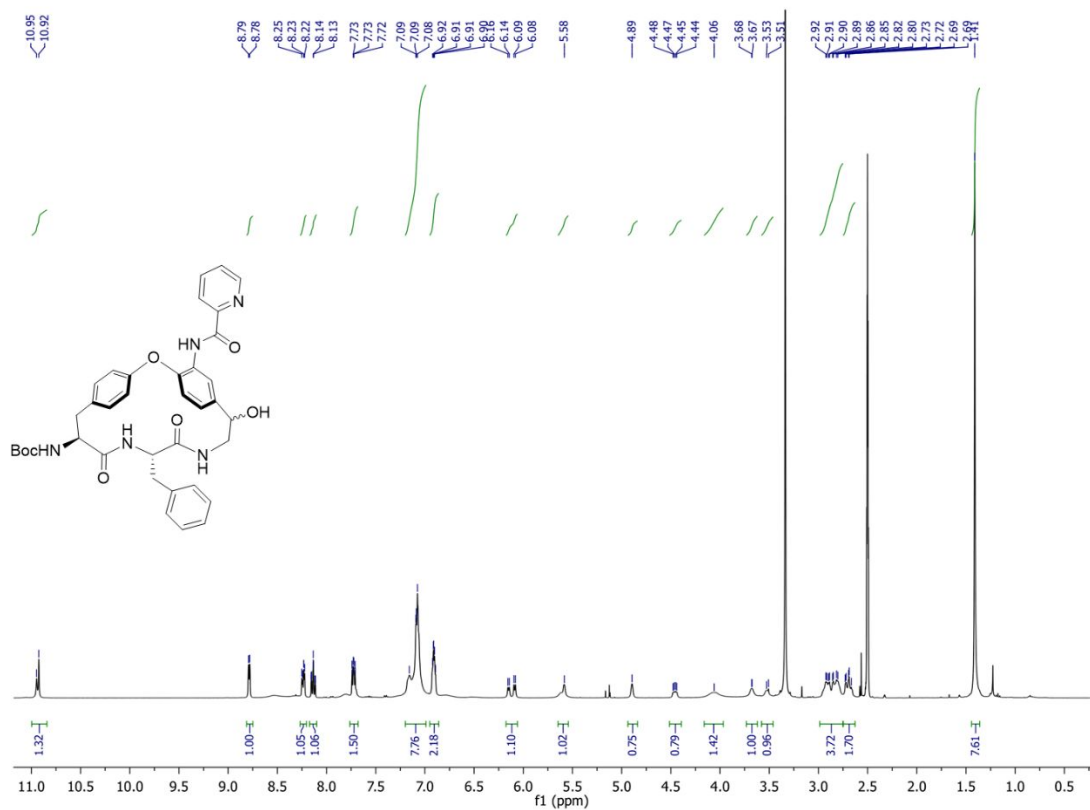



**Compound 44:  $^{13}\text{C}$  NMR (DMSO- $d_6$ , 125 MHz)**

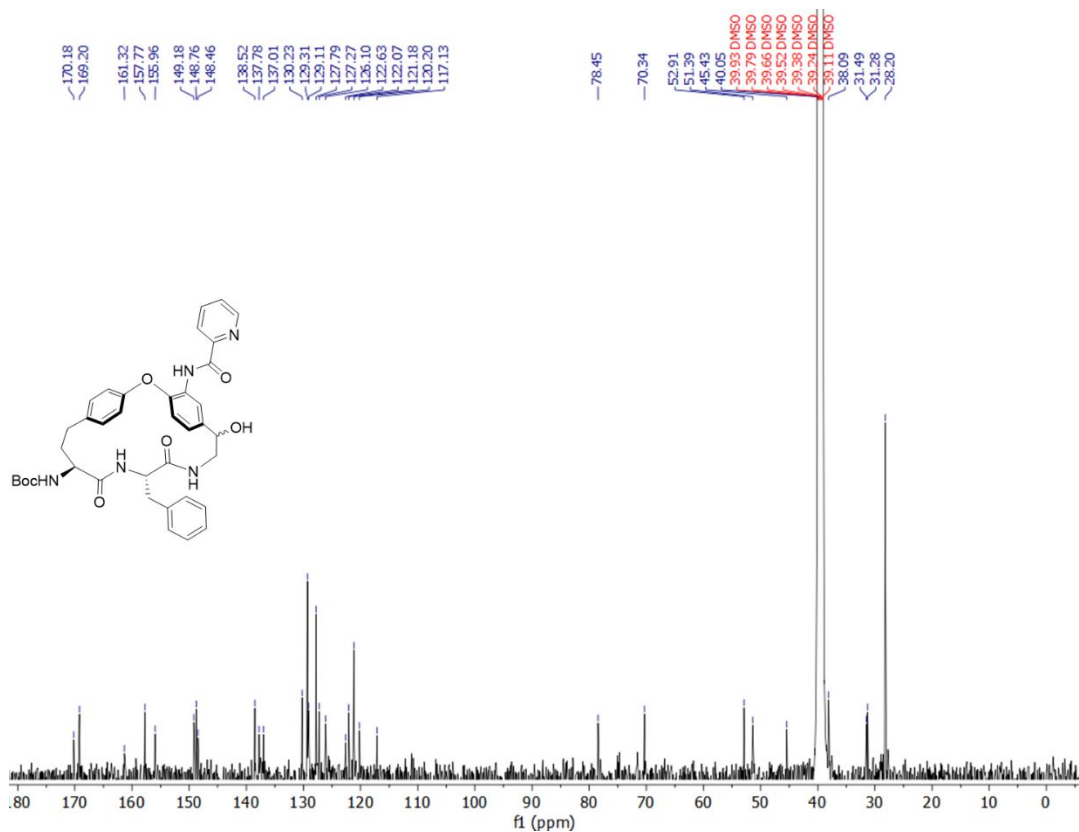

**Compound 52:  $^1\text{H}$  NMR (DMSO- $d_6$ , 400 MHz)**

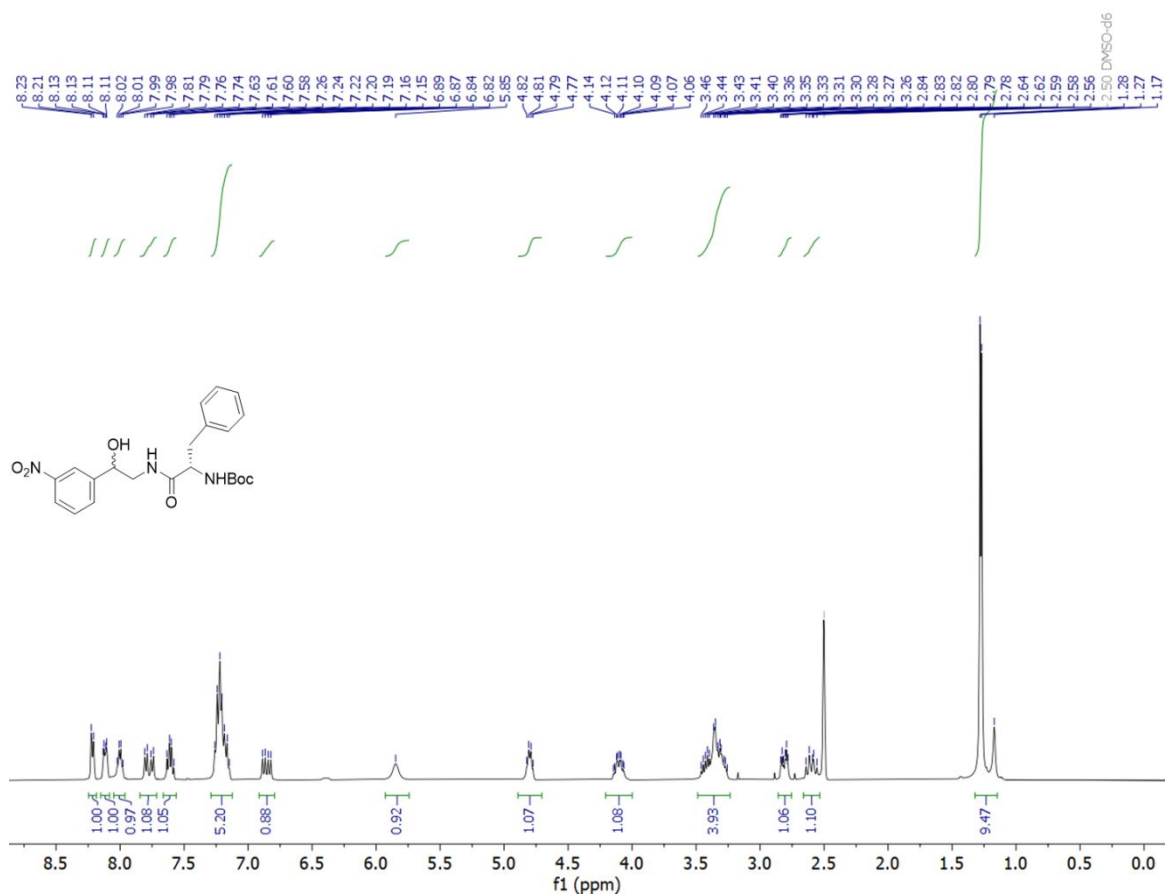



**Compound 53:  $^{13}\text{C}$  NMR ( $\text{CD}_3\text{CN}$ , 100 MHz)**

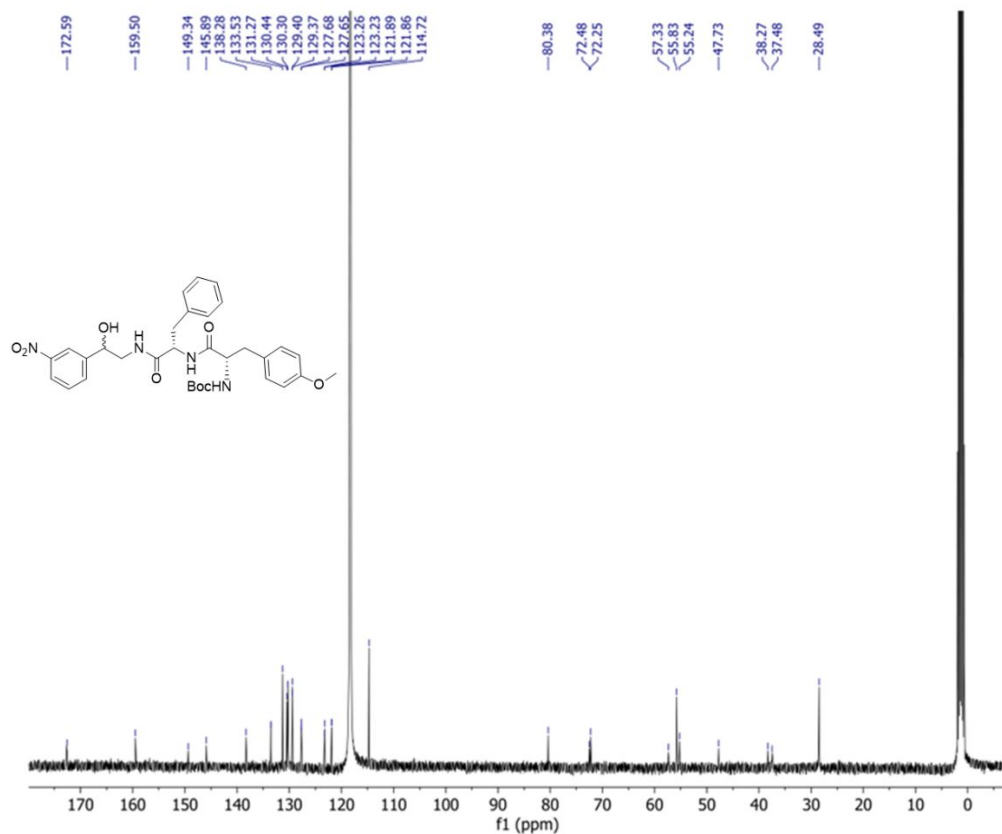

**Compound 54:  $^1\text{H}$  NMR ( $\text{CD}_3\text{CN}$ , 500 MHz)**

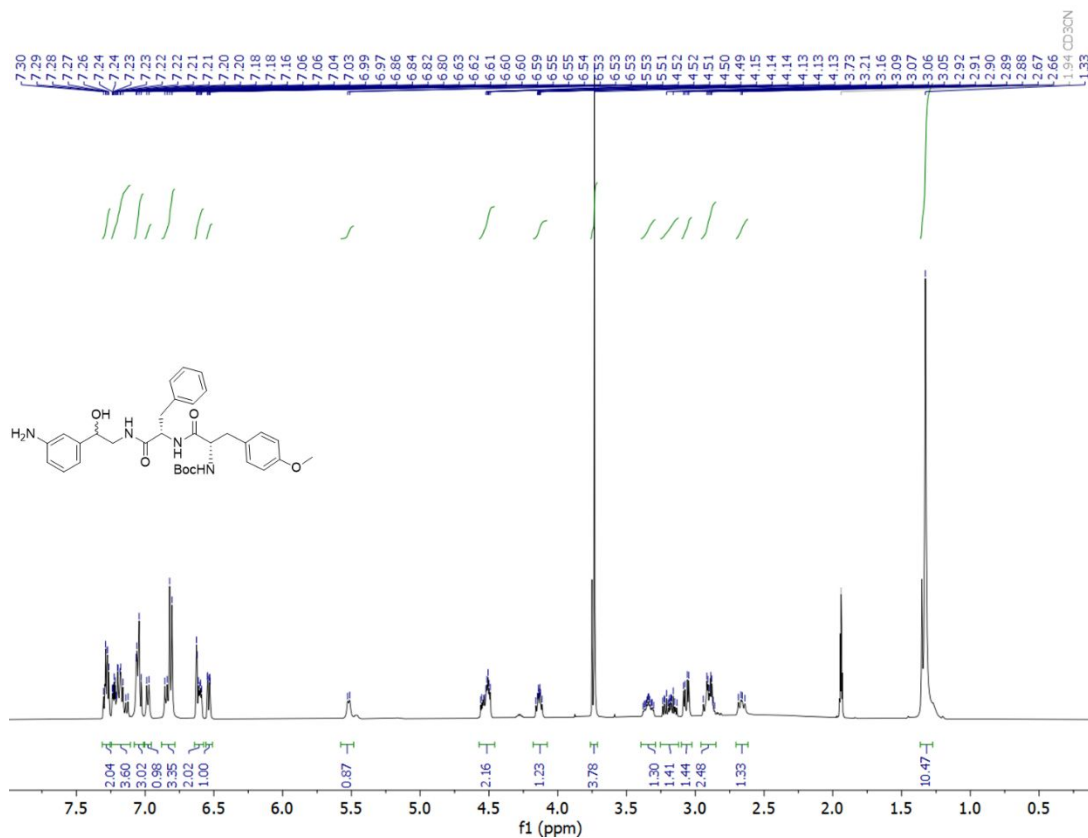

**Compound 54:  $^{13}\text{C}$  NMR ( $\text{CD}_3\text{CN}$ , 125 MHz)**

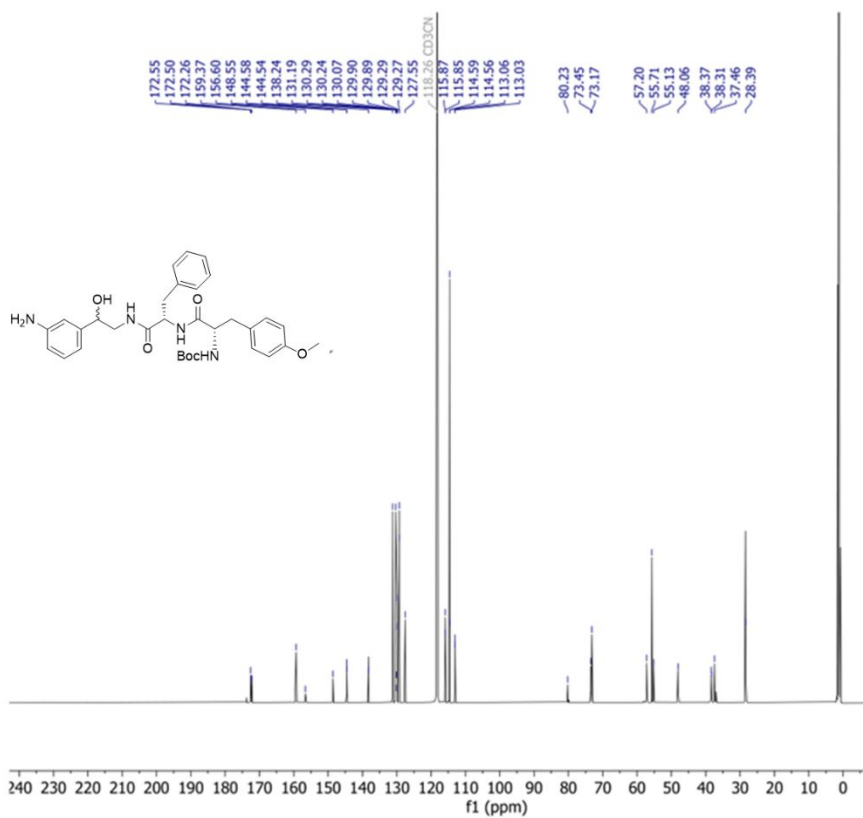

**Compound 55:  $^1\text{H}$  NMR ( $\text{CD}_3\text{CN}$ , 400 MHz)**

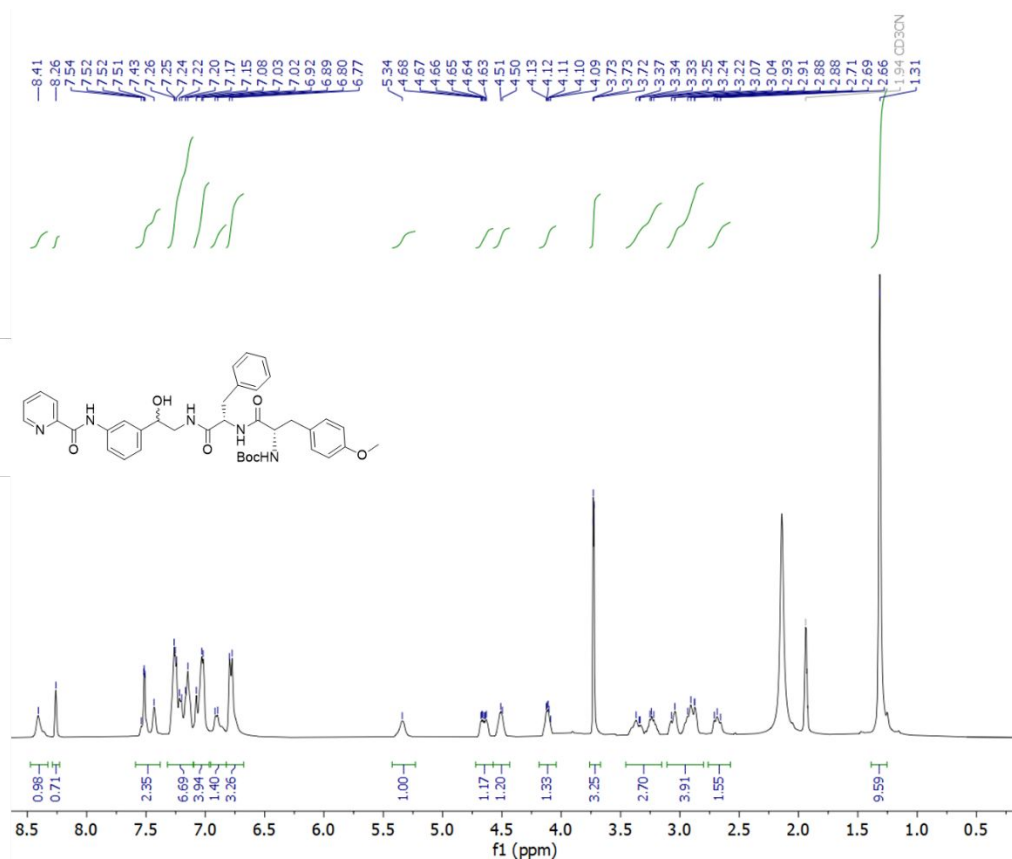

Compound 55:  $^{13}\text{C}$  NMR ( $\text{CD}_3\text{CN}$ , 100 MHz)

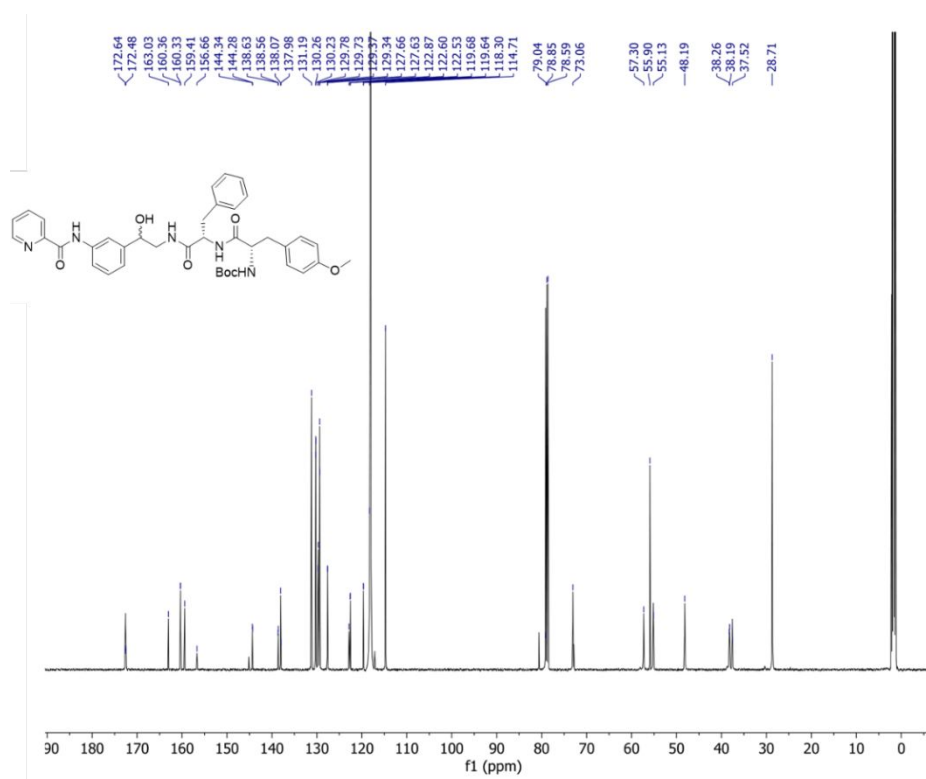

# HPLC CHROMATOGRAMS AND MASS SPECTRA

## LC-MS after purification by HPLC: Compound 1

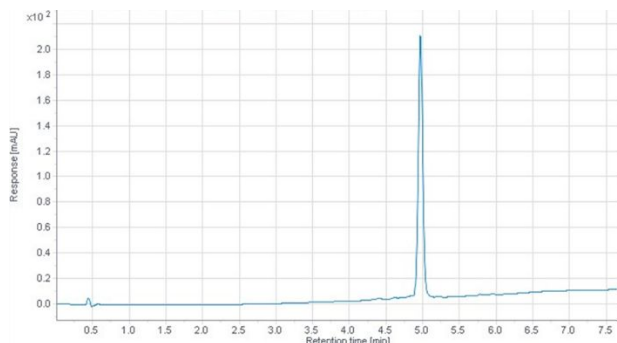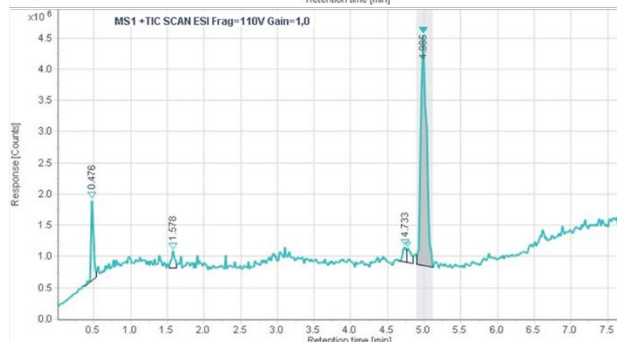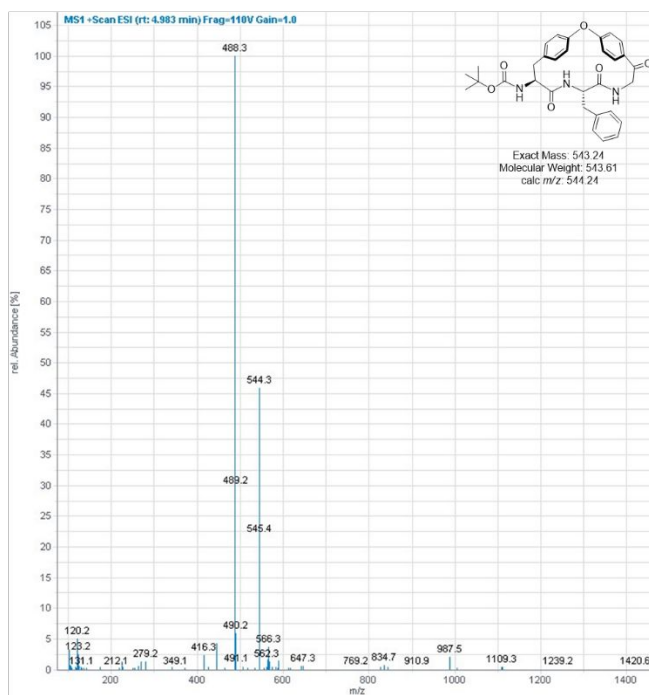

## LC-MS after purification by HPLC: Compound 2

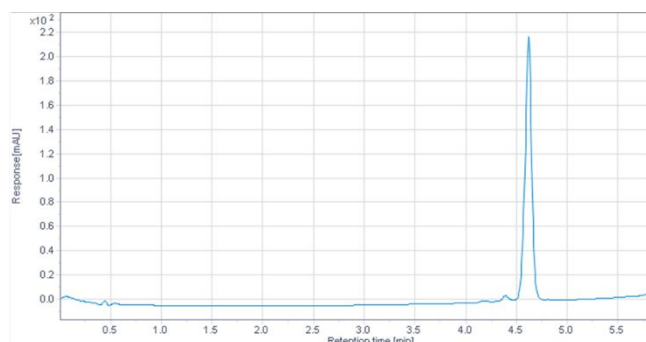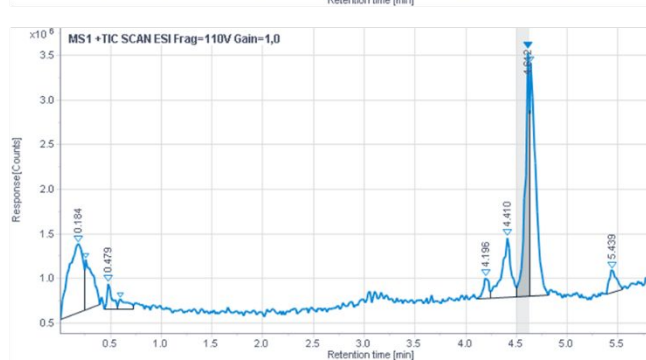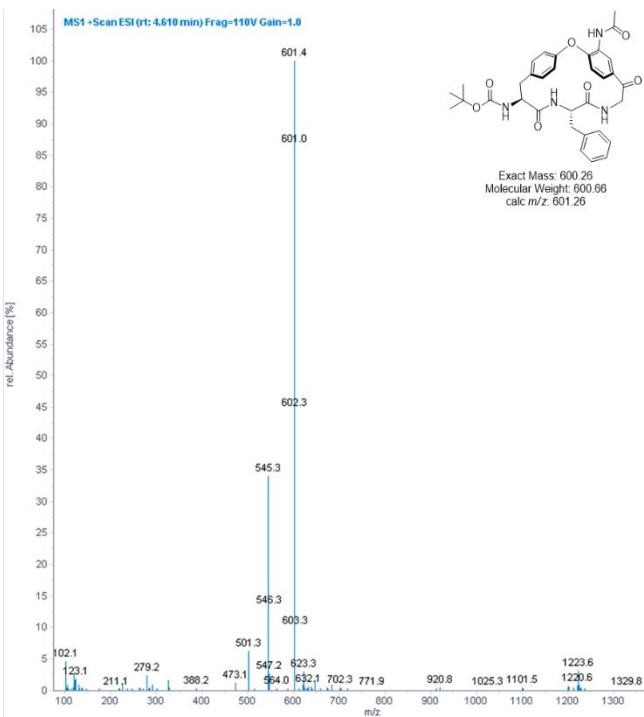



### LC-MS after purification by HPLC purification: Compound 3

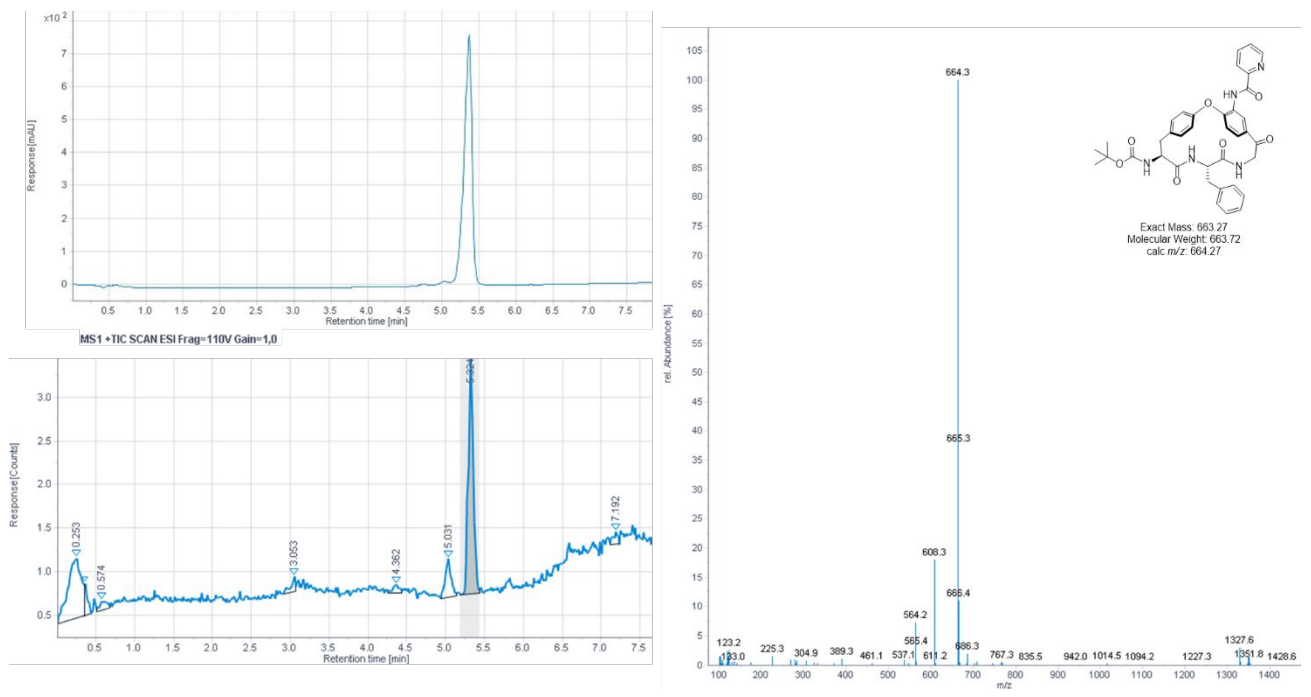

### LC-MS after purification by HPLC: Compound 4

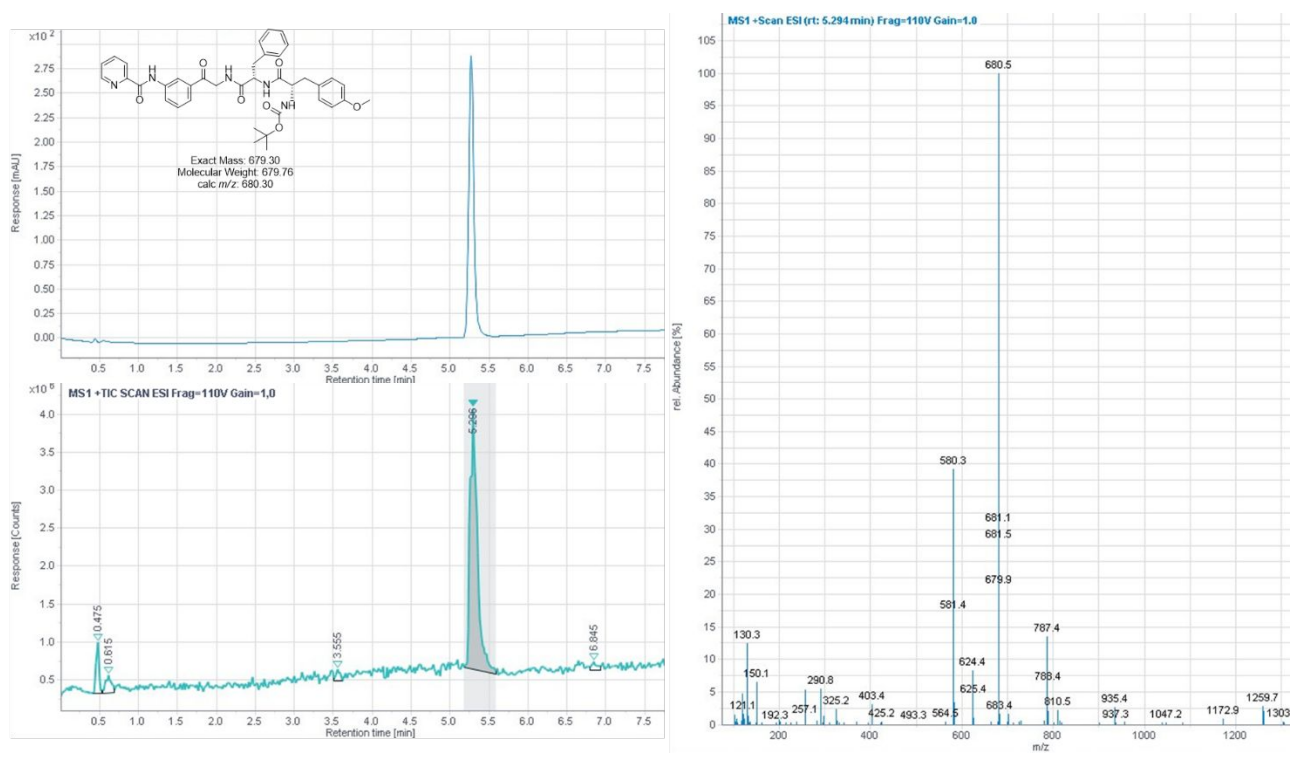

## LC-MS after purification by HPLC: Compound 5

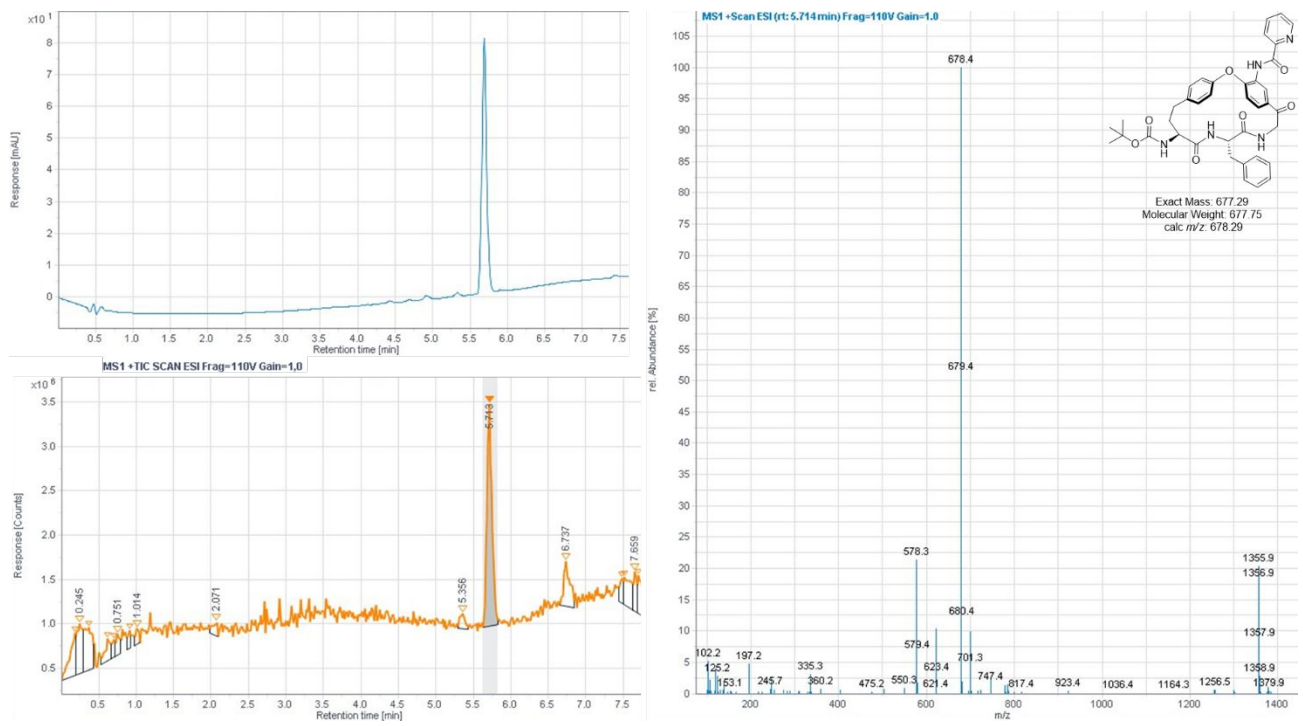

## LC-MS after purification by HPLC: Compound 6

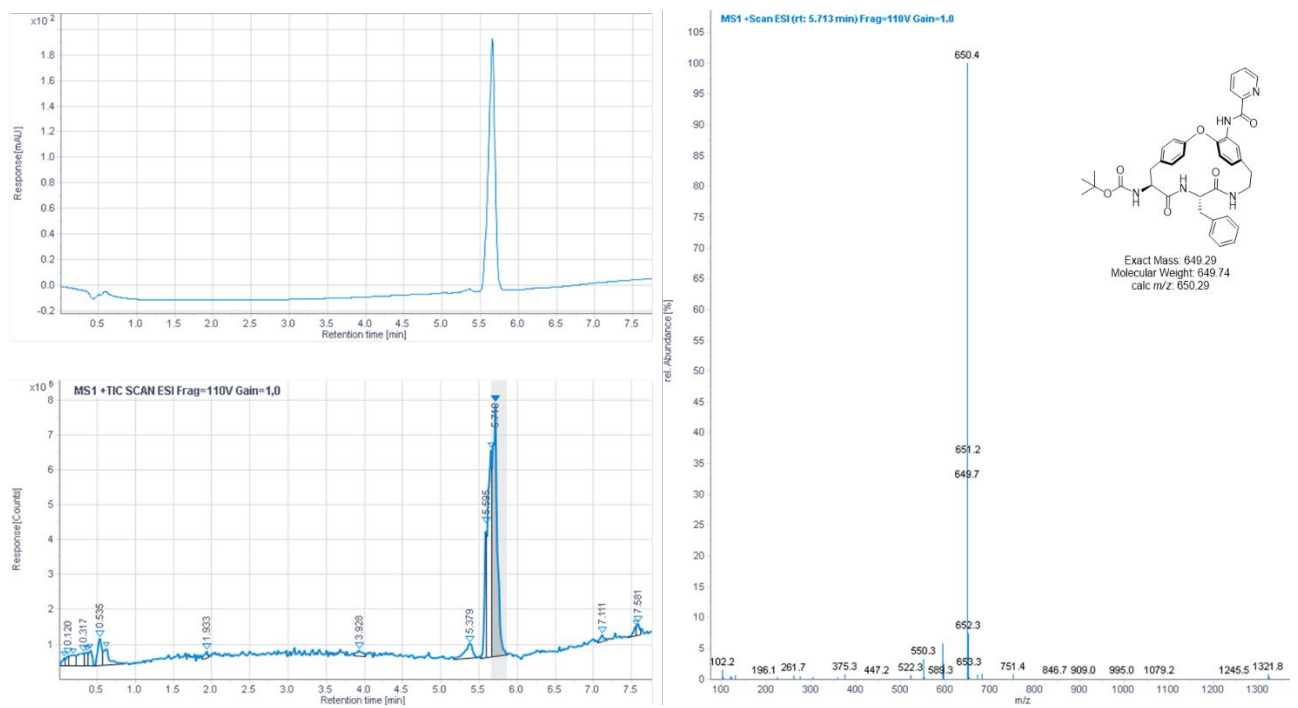

## LC-MS after purification by HPLC: Compound 7

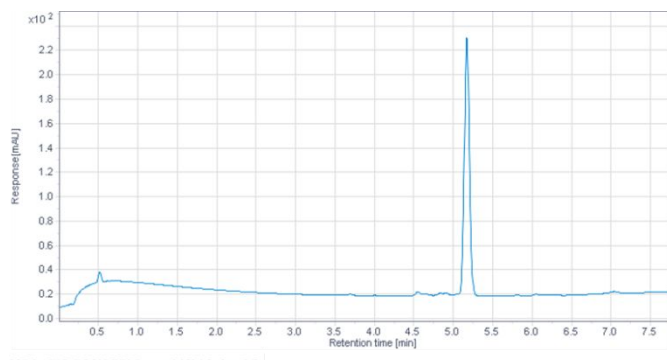

MS1 - Scan ESI (rt: 5.201 min) Frag=110V Gain=1.0

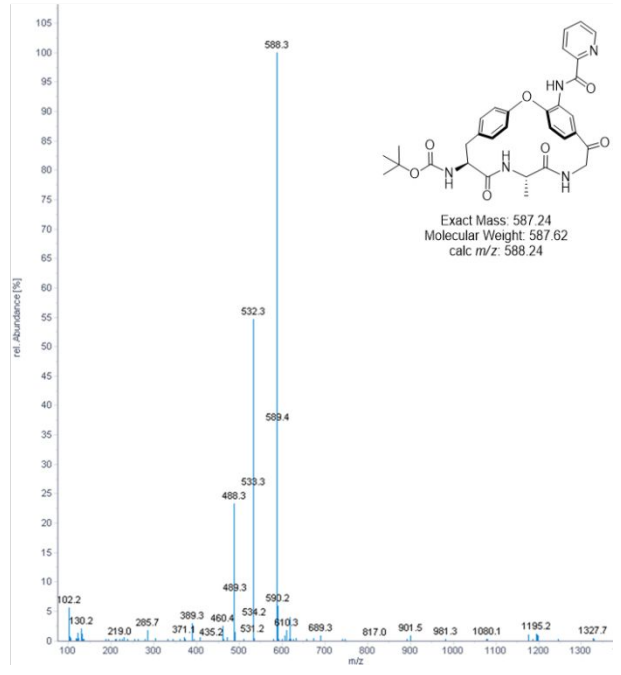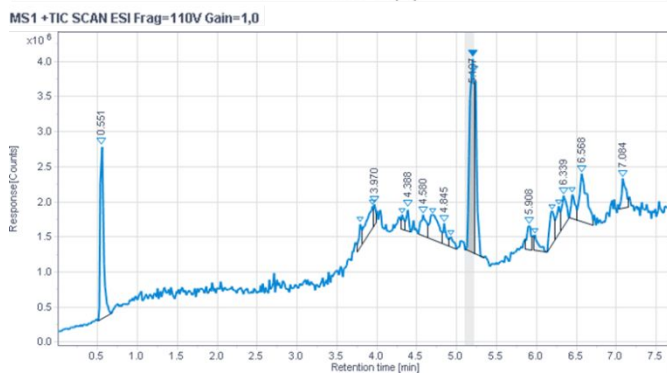

## LC-MS after purification by HPLC: Compound 8

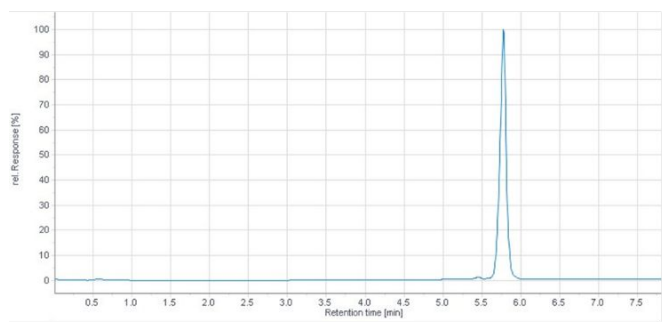

MS1 - Scan ESI (rt: 5.838 min) Frag=110V Gain=1.0

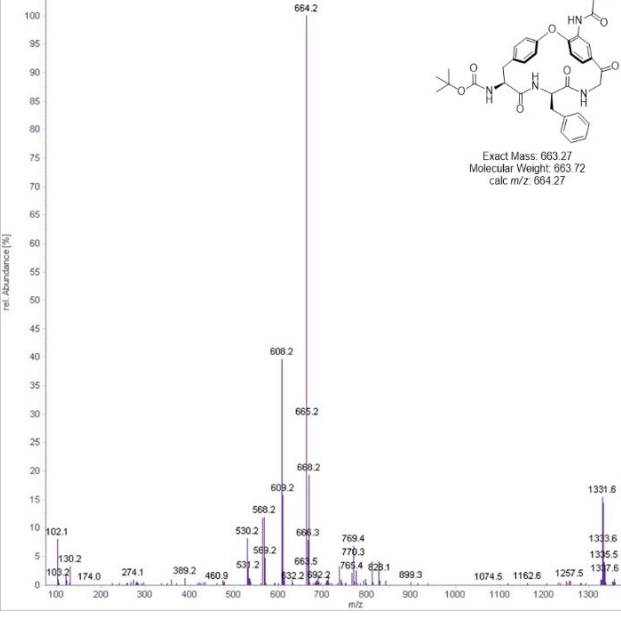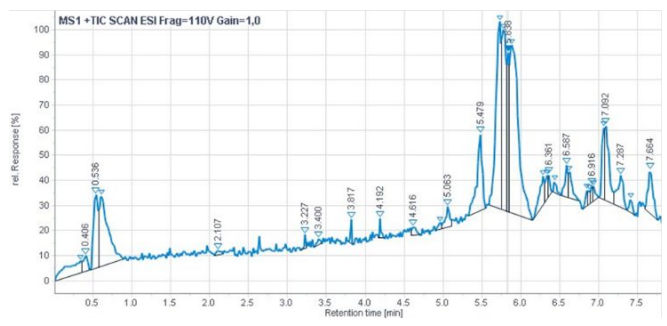

## LC-MS after purification by HPLC: Compound 9

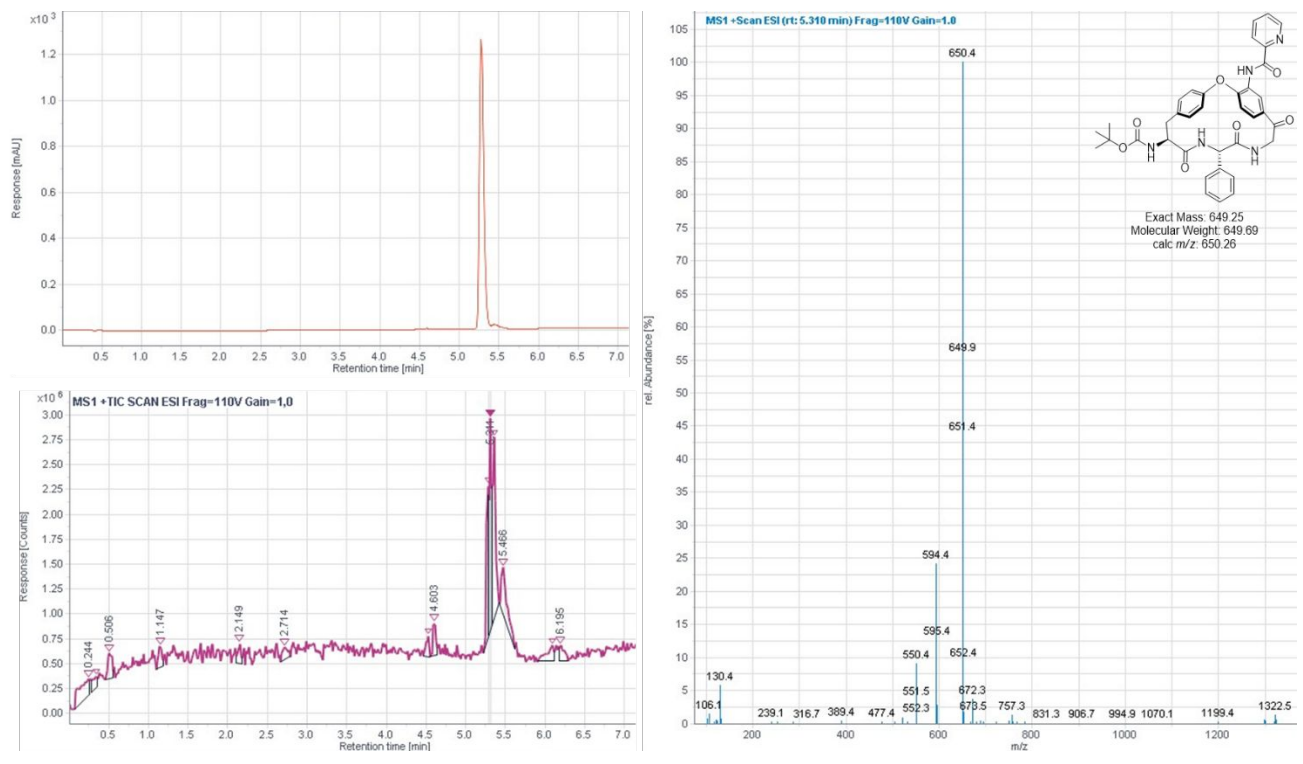

## LC-MS after purification by HPLC: Compound 10

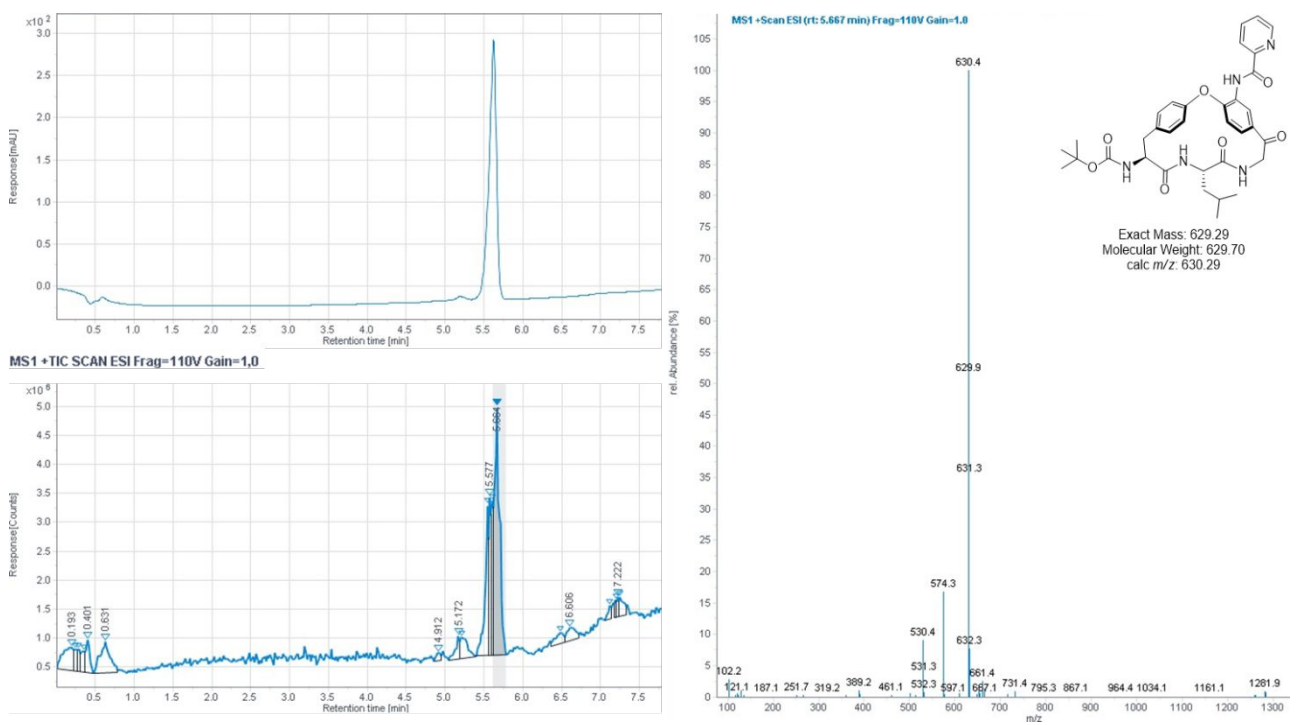

## LC-MS after purification by HPLC: Compound 11

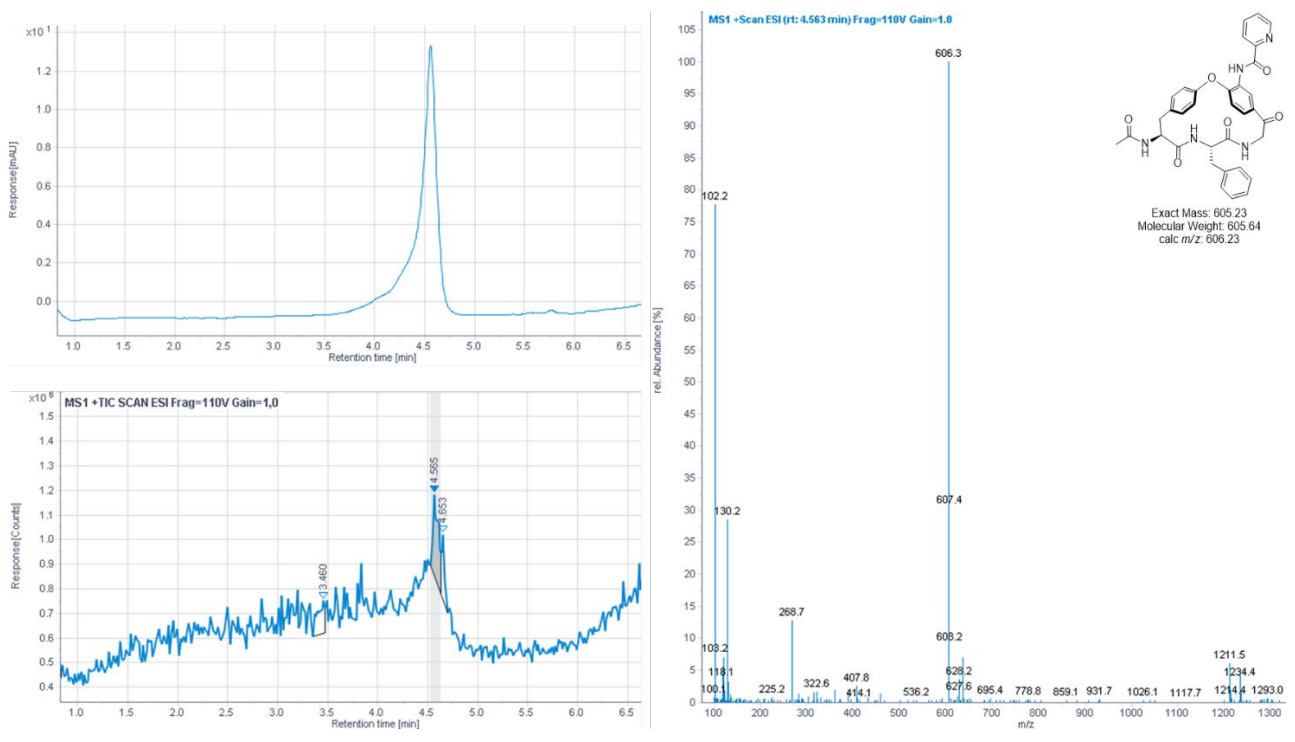

## LC-MS after purification by HPLC: Compound 12

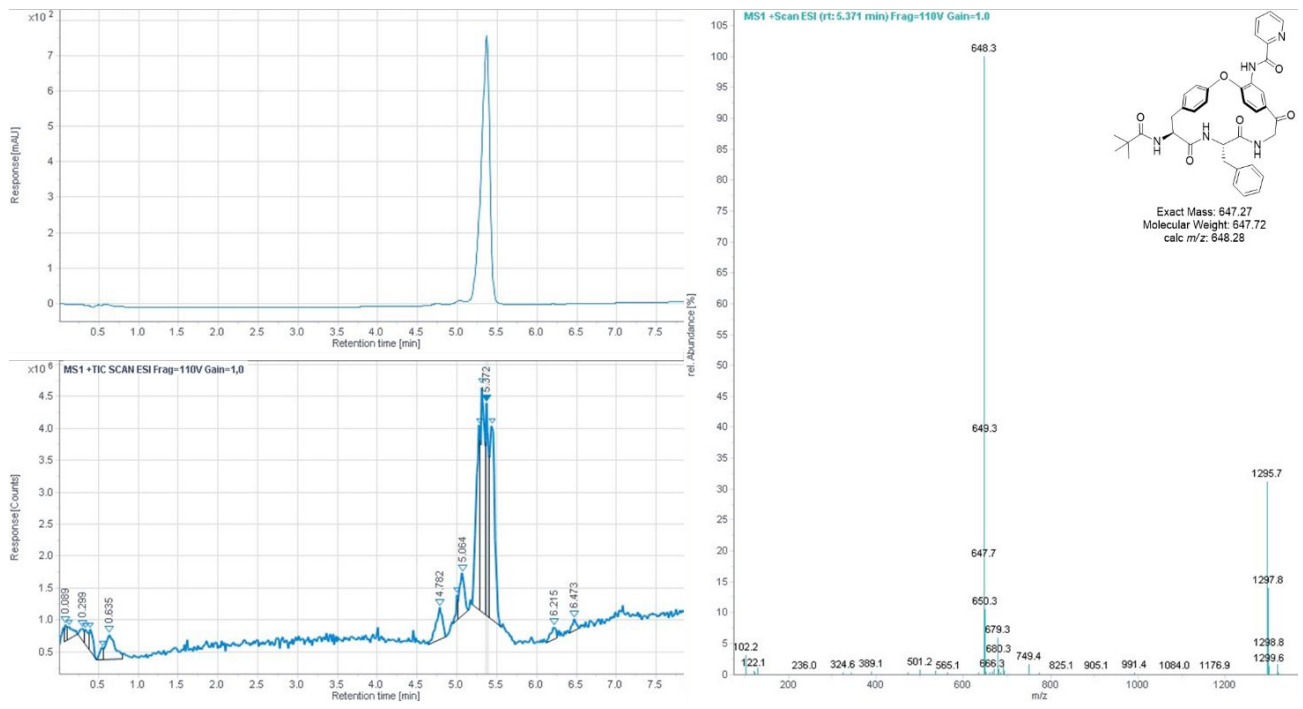

Supplement: jm4c01370_si_001.pdf [file jm4c01370_si_001.pdf]
